# Supplementary material
Source: publisher figshare collection journal article supplement (https://tandf.figshare.com/articles/dataset/_/9888425)
Supplement: Supplementary file 1 [file 2]

Archive with 7 entries (7 files):
- tbsd_a_1671231_sm6020.xlsx
- tbsd_a_1671231_sm6019.xls
- tbsd_a_1671231_sm6018.pdf
- tbsd_a_1671231_sm6017.pdf
- tbsd_a_1671231_sm6016.pdf
- tbsd_a_1671231_sm6015.tif
- tbsd_a_1671231_sm6014.tif
