# Supplementary material
Source: publisher figshare collection journal article supplement (https://tandf.figshare.com/articles/dataset/_/9888425)
Supplement: Supplementary file 1 [file 2 › tbsd_a_1671231_sm6019.xls]

## Sheet: ClueGO Results
GOID	GOTerm	Ontology Source	Term PValue	Term PValue Corrected with Benjamini-Hochberg	Group PValue	Group PValue Corrected with Benjamini-Hochberg	GOLevels	GOGroups	% Associated Genes	Nr. Genes	Cluster	Genes Cluster #1	Genes Cluster #2	Genes Cluster #3	%Genes Cluster #1	%Genes Cluster #2	%Genes Cluster #3	Associated Genes Found
KEGG:05162	Measles	KEGG_03.10.2018	0.0396924	0.132609	0.00208818	0.0104409	[-1]	Group00	15.9091	21	Specific for Cluster #1	[DDX58, FAS, IFIH1, IL2RG, IRF9, MX1, OAS1, OAS2, OAS3, STAT1, STAT2, TACR1, TLR7, TNFAIP3]	[FCGR2B, HSPA1A, IL1A, TNFSF10]	[FAS, FCGR2B, HSPA2, MSN, TLR2, TLR7, TNFSF10]	63.0556	18.0159	31.5278	[DDX58, FAS, FCGR2B, HSPA1A, HSPA2, IFIH1, IL1A, IL2RG, IRF9, MSN, MX1, OAS1, OAS2, OAS3, STAT1, STAT2, TACR1, TLR2, TLR7, TNFAIP3, TNFSF10]
KEGG:05164	Influenza A	KEGG_03.10.2018	9.52501e-05	0.00155575	0.00208818	0.0104409	[-1]	Group00	19.883	34	None Specific Cluster	[CCL2, CCL5, CXCL10, CXCL8, DDX58, FAS, HLA-DMB, HLA-DPA1, HLA-DQA1, HLA-DRA, ICAM1, IFIH1, IRF9, JUN, MX1, OAS1, OAS2, OAS3, RSAD2, STAT1, STAT2, TLR7]	[CCL2, HLA-DOB, HLA-DPA1, HLA-DPB1, HLA-DQA1, HLA-DRA, HSPA1A, IL18, IL1A, IL33, PRKCB, SOCS3, TNFSF10]	[CCL2, CCL5, CXCL10, CXCL8, FAS, HLA-DMA, HLA-DMB, HLA-DPA1, HLA-DPB1, HLA-DQA1, HLA-DRA, HSPA2, ICAM1, IL18, TLR3, TLR7, TNFSF10]	57.748	34.1238	44.6234	[CCL2, CCL5, CXCL10, CXCL8, DDX58, FAS, HLA-DMA, HLA-DMB, HLA-DOB, HLA-DPA1, HLA-DPB1, HLA-DQA1, HLA-DRA, HSPA1A, HSPA2, ICAM1, IFIH1, IL18, IL1A, IL33, IRF9, JUN, MX1, OAS1, OAS2, OAS3, PRKCB, RSAD2, SOCS3, STAT1, STAT2, TLR3, TLR7, TNFSF10]
KEGG:05168	Herpes simplex infection	KEGG_03.10.2018	0.00430426	0.0243356	0.00208818	0.0104409	[-1]	Group00	16.7568	31	Specific for Cluster #1	[C3, CCL2, CCL5, DDX58, FAS, FOS, HLA-A, HLA-DMB, HLA-DPA1, HLA-DQA1, HLA-DRA, HLA-G, IFIH1, IFIT1, IRF9, JUN, OAS1, OAS2, OAS3, STAT1, STAT2, TAP2]	[CCL2, CDC34, CDK1, FOS, HCFC1, HLA-DOB, HLA-DPA1, HLA-DPB1, HLA-DQA1, HLA-DRA, SOCS3]	[C3, CCL2, CCL5, CDK1, FAS, HLA-DMA, HLA-DMB, HLA-DPA1, HLA-DPB1, HLA-DQA1, HLA-DRA, TLR2, TLR3]	63.6524	31.8262	37.6128	[C3, CCL2, CCL5, CDC34, CDK1, DDX58, FAS, FOS, HCFC1, HLA-A, HLA-DMA, HLA-DMB, HLA-DOB, HLA-DPA1, HLA-DPB1, HLA-DQA1, HLA-DRA, HLA-G, IFIH1, IFIT1, IRF9, JUN, OAS1, OAS2, OAS3, SOCS3, STAT1, STAT2, TAP2, TLR2, TLR3]
KEGG:04010	MAPK signaling pathway	KEGG_03.10.2018	0.0382664	0.133933	0.0519207	0.0865345	[-1]	Group01	13.8983	41	None Specific Cluster	[ANGPT2, AREG, BDNF, CACNA1G, CACNG3, DUSP5, DUSP6, EFNA3, FAS, FOS, GADD45A, JUN, KDR, MET, NR4A1, PDGFRA, RASGRP1, VEGFA]	[ANGPT1, BDNF, CACNB3, CACNB4, CACNG3, DUSP4, DUSP6, FGF5, FGF9, FOS, HSPA1A, IL1A, IL1R1, JUND, KDR, LAMTOR3, MAPK8IP1, MET, NR4A1, PDGFD, PRKCB, PRKCG, VEGFA]	[ANGPT2, BDNF, CACNG4, CSF1, DUSP4, FAS, FGF1, HSPA2, IL1R1, MET, NR4A1, PDGFRA, PTPRR, RASGRP3, RRAS, VEGFA, VEGFD]	40.152	51.3053	37.9213	[ANGPT1, ANGPT2, AREG, BDNF, CACNA1G, CACNB3, CACNB4, CACNG3, CACNG4, CSF1, DUSP4, DUSP5, DUSP6, EFNA3, FAS, FGF1, FGF5, FGF9, FOS, GADD45A, HSPA1A, HSPA2, IL1A, IL1R1, JUN, JUND, KDR, LAMTOR3, MAPK8IP1, MET, NR4A1, PDGFD, PDGFRA, PRKCB, PRKCG, PTPRR, RASGRP1, RASGRP3, RRAS, VEGFA, VEGFD]
KEGG:04014	Ras signaling pathway	KEGG_03.10.2018	0.150874	0.321427	0.0519207	0.0865345	[-1]	Group01	12.931	30	None Specific Cluster	[ANGPT2, BDNF, EFNA3, GRIN2B, KDR, MET, PDGFRA, PLA1A, PLA2G2A, RASA4, RASAL1, RASGRP1, VEGFA]	[ANGPT1, BDNF, FGF5, FGF9, GRIN2A, KDR, MET, PDGFD, PLA2G10, PLA2G5, PRKCB, PRKCG, VEGFA]	[ANGPT2, BDNF, CSF1, ETS2, FGF1, GNG2, GRIN2B, MET, PDGFRA, PLA1A, PLA2G10, PLA2G2A, PLCE1, RASAL1, RASGRP3, RRAS, VEGFA, VEGFD]	38.9476	38.9476	53.9275	[ANGPT1, ANGPT2, BDNF, CSF1, EFNA3, ETS2, FGF1, FGF5, FGF9, GNG2, GRIN2A, GRIN2B, KDR, MET, PDGFD, PDGFRA, PLA1A, PLA2G10, PLA2G2A, PLA2G5, PLCE1, PRKCB, PRKCG, RASA4, RASAL1, RASGRP1, RASGRP3, RRAS, VEGFA, VEGFD]
KEGG:04015	Rap1 signaling pathway	KEGG_03.10.2018	0.0353844	0.126866	0.0519207	0.0865345	[-1]	Group01	14.5631	30	None Specific Cluster	[ANGPT2, APBB1IP, ARAP3, EFNA3, GRIN2B, KDR, MET, PDGFRA, PLCB4, THBS1, VEGFA]	[ANGPT1, FGF5, FGF9, GRIN2A, ITGB3, KDR, MET, PDGFD, PLCB1, PRKCB, PRKCG, THBS1, VEGFA]	[ANGPT2, ARAP3, CSF1, F2R, FGF1, GRIN2B, ITGB3, LPAR3, LPAR4, MET, PDGFRA, PLCE1, RASGRP3, RGS14, RRAS, VEGFA, VEGFD]	33.5824	39.6883	51.9	[ANGPT1, ANGPT2, APBB1IP, ARAP3, CSF1, EFNA3, F2R, FGF1, FGF5, FGF9, GRIN2A, GRIN2B, ITGB3, KDR, LPAR3, LPAR4, MET, PDGFD, PDGFRA, PLCB1, PLCB4, PLCE1, PRKCB, PRKCG, RASGRP3, RGS14, RRAS, THBS1, VEGFA, VEGFD]
KEGG:05410	Hypertrophic cardiomyopathy (HCM)	KEGG_03.10.2018	0.853995	0.936845	0.439523	0.488359	[-1]	Group02	10.8434	9	None Specific Cluster	[CACNG3, ITGA5, ITGB4]	[CACNB3, CACNB4, CACNG3, ITGB3, TTN]	[CACNG4, ITGA2, ITGB3, ITGB4]	29.4743	49.1238	39.299	[CACNB3, CACNB4, CACNG3, CACNG4, ITGA2, ITGA5, ITGB3, ITGB4, TTN]
KEGG:05412	Arrhythmogenic right ventricular cardiomyopathy (ARVC)	KEGG_03.10.2018	0.07475	0.203486	0.439523	0.488359	[-1]	Group02	16.6667	12	None Specific Cluster	[CACNG3, DSP, GJA1, ITGA5, ITGB4]	[CACNB3, CACNB4, CACNG3, DSP, GJA1, ITGB3]	[ACTN2, CACNG4, DSC2, DSP, GJA1, ITGA2, ITGB3, ITGB4]	35.1638	42.1966	56.2621	[ACTN2, CACNB3, CACNB4, CACNG3, CACNG4, DSC2, DSP, GJA1, ITGA2, ITGA5, ITGB3, ITGB4]
KEGG:05414	Dilated cardiomyopathy (DCM)	KEGG_03.10.2018	0.724456	0.838543	0.439523	0.488359	[-1]	Group02	11.1111	10	None Specific Cluster	[CACNG3, ITGA5, ITGB4]	[CACNB3, CACNB4, CACNG3, ITGB3, TTN]	[CACNG4, ITGA2, ITGB3, ITGB4, PLN]	26.9314	44.8856	44.8856	[CACNB3, CACNB4, CACNG3, CACNG4, ITGA2, ITGA5, ITGB3, ITGB4, PLN, TTN]
KEGG:04151	PI3K-Akt signaling pathway	KEGG_03.10.2018	0.418969	0.615885	0.338415	0.423019	[-1]	Group03	11.2994	40	None Specific Cluster	[ANGPT2, AREG, BDNF, EFNA3, GH1, IL2RG, ITGA5, ITGB4, KDR, MET, NR4A1, OSMR, PDGFRA, THBS1, TNC, VEGFA]	[ANGPT1, BDNF, FGF5, FGF9, FN1, GHR, IBSP, ITGB3, KDR, LAMA4, MET, NR4A1, OSMR, PDGFD, RELN, SPP1, THBS1, TNC, VEGFA]	[ANGPT2, BDNF, CSF1, F2R, FGF1, GNG2, ITGA2, ITGB3, ITGB4, LPAR3, LPAR4, MET, NR4A1, PCK1, PDGFRA, PRLR, SPP1, TLR2, TNC, TNR, VEGFA, VEGFD, VWF]	36.3397	43.1534	52.2383	[ANGPT1, ANGPT2, AREG, BDNF, CSF1, EFNA3, F2R, FGF1, FGF5, FGF9, FN1, GH1, GHR, GNG2, IBSP, IL2RG, ITGA2, ITGA5, ITGB3, ITGB4, KDR, LAMA4, LPAR3, LPAR4, MET, NR4A1, OSMR, PCK1, PDGFD, PDGFRA, PRLR, RELN, SPP1, THBS1, TLR2, TNC, TNR, VEGFA, VEGFD, VWF]
KEGG:04510	Focal adhesion	KEGG_03.10.2018	0.154477	0.315391	0.338415	0.423019	[-1]	Group03	13.0653	26	None Specific Cluster	[ITGA5, ITGB4, JUN, KDR, MET, MYL12A, PDGFRA, THBS1, TNC, VEGFA]	[FN1, IBSP, ITGB3, KDR, LAMA4, MET, PDGFD, PIP5K1C, PRKCB, PRKCG, RELN, SPP1, THBS1, TNC, VAV3, VEGFA]	[CAV1, ITGA2, ITGB3, ITGB4, MET, MYL12A, PDGFRA, SPP1, TNC, TNR, VEGFA, VEGFD, VWF]	34.2048	54.7277	44.4662	[CAV1, FN1, IBSP, ITGA2, ITGA5, ITGB3, ITGB4, JUN, KDR, LAMA4, MET, MYL12A, PDGFD, PDGFRA, PIP5K1C, PRKCB, PRKCG, RELN, SPP1, THBS1, TNC, TNR, VAV3, VEGFA, VEGFD, VWF]
KEGG:04512	ECM-receptor interaction	KEGG_03.10.2018	0.00130405	0.00871344	0.338415	0.423019	[-1]	Group03	21.9512	18	None Specific Cluster	[CD44, ITGA5, ITGB4, SDC4, SV2C, THBS1, TNC]	[CD44, FN1, IBSP, ITGB3, LAMA4, RELN, SPP1, SV2A, SV2C, THBS1, TNC]	[CD36, CD44, ITGA2, ITGB3, ITGB4, SPP1, TNC, TNR, VWF]	34.1046	53.593	43.8488	[CD36, CD44, FN1, IBSP, ITGA2, ITGA5, ITGB3, ITGB4, LAMA4, RELN, SDC4, SPP1, SV2A, SV2C, THBS1, TNC, TNR, VWF]
KEGG:04723	Retrograde endocannabinoid signaling	KEGG_03.10.2018	0.0716934	0.202672	0.0822851	0.11755	[-1]	Group04	14.8649	22	Specific for Cluster #2	[GABRA5, GABRE, NDUFA2, NDUFB3, PLCB4, PTGS2, SLC17A7]	[GABRA1, GABRA2, GABRA3, GABRA5, GABRE, GABRG2, GABRQ, KCNJ6, NDUFA2, NDUFB10, NDUFB3, NDUFB4, NDUFB5, PLCB1, PRKCB, PRKCG, PTGS2, SLC17A6]	[GABRA2, GABRA5, GABRG1, GABRQ, GNG2, PTGS2, SLC17A6, SLC17A7]	28.1285	72.3303	32.1468	[GABRA1, GABRA2, GABRA3, GABRA5, GABRE, GABRG1, GABRG2, GABRQ, GNG2, KCNJ6, NDUFA2, NDUFB10, NDUFB3, NDUFB4, NDUFB5, PLCB1, PLCB4, PRKCB, PRKCG, PTGS2, SLC17A6, SLC17A7]
KEGG:04727	GABAergic synapse	KEGG_03.10.2018	0.0473129	0.147979	0.0822851	0.11755	[-1]	Group04	17.0455	15	Specific for Cluster #2	[GABRA5, GABRE, SLC6A13]	[GABBR2, GABRA1, GABRA2, GABRA3, GABRA5, GABRE, GABRG2, GABRQ, KCNJ6, PRKCB, PRKCG, SLC6A13]	[GABRA2, GABRA5, GABRG1, GABRQ, GNG2, SLC38A3, SLC6A13]	17.5219	70.0877	40.8845	[GABBR2, GABRA1, GABRA2, GABRA3, GABRA5, GABRE, GABRG1, GABRG2, GABRQ, GNG2, KCNJ6, PRKCB, PRKCG, SLC38A3, SLC6A13]
KEGG:05032	Morphine addiction	KEGG_03.10.2018	0.112145	0.265892	0.0822851	0.11755	[-1]	Group04	15.3846	14	Specific for Cluster #2	[GABRA5, GABRE, PDE2A]	[GABBR2, GABRA1, GABRA2, GABRA3, GABRA5, GABRE, GABRG2, GABRQ, KCNJ6, PDE2A, PRKCB, PRKCG]	[GABRA2, GABRA5, GABRG1, GABRQ, GNG2, PDE2A]	18.5747	74.299	37.1495	[GABBR2, GABRA1, GABRA2, GABRA3, GABRA5, GABRE, GABRG1, GABRG2, GABRQ, GNG2, KCNJ6, PDE2A, PRKCB, PRKCG]
KEGG:05033	Nicotine addiction	KEGG_03.10.2018	9.39245e-05	0.00172586	0.0822851	0.11755	[-1]	Group04	32.5	13	Specific for Cluster #2	[CHRNB2, GABRA5, GABRE, GRIN2B, SLC17A7]	[CHRNB2, GABRA1, GABRA2, GABRA3, GABRA5, GABRE, GABRG2, GABRQ, GRIN2A, SLC17A6]	[GABRA2, GABRA5, GABRG1, GABRQ, GRIN2B, SLC17A6, SLC17A7]	31.9154	63.8308	44.6816	[CHRNB2, GABRA1, GABRA2, GABRA3, GABRA5, GABRE, GABRG1, GABRG2, GABRQ, GRIN2A, GRIN2B, SLC17A6, SLC17A7]
KEGG:04310	Wnt signaling pathway	KEGG_03.10.2018	0.334728	0.546722	1	1	[-1]	Group05	12.3288	18	None Specific Cluster	[BAMBI, DKK2, JUN, PLCB4, WIF1, WNT2]	[PLCB1, PORCN, PRKCB, PRKCG, SERPINF1, WIF1, WNT7B]	[CAMK2D, DAAM2, DKK1, FRAT1, SERPINF1, SFRP2, WIF1, WNT10B]	31.6456	36.9199	42.1941	[BAMBI, CAMK2D, DAAM2, DKK1, DKK2, FRAT1, JUN, PLCB1, PLCB4, PORCN, PRKCB, PRKCG, SERPINF1, SFRP2, WIF1, WNT10B, WNT2, WNT7B]
KEGG:04916	Melanogenesis	KEGG_03.10.2018	0.507458	0.672039	1	1	[-1]	Group05	11.8812	12	None Specific Cluster	[DCT, EDNRB, PLCB4, TYRP1, WNT2]	[EDN1, PLCB1, PRKCB, PRKCG, WNT7B]	[CAMK2D, WNT10B]	41.6667	41.6667	16.6667	[CAMK2D, DCT, EDN1, EDNRB, PLCB1, PLCB4, PRKCB, PRKCG, TYRP1, WNT10B, WNT2, WNT7B]
KEGG:04927	Cortisol synthesis and secretion	KEGG_03.10.2018	1	1	1	1	[-1]	Group05	9.375	6	Specific for Cluster #1	[CACNA1G, KCNK2, LDLR, NR4A1, PLCB4]	[NR4A1, PLCB1]	[NR4A1]	71.8045	28.7218	14.3609	[CACNA1G, KCNK2, LDLR, NR4A1, PLCB1, PLCB4]
KEGG:04934	Cushing syndrome	KEGG_03.10.2018	0.279027	0.488297	1	1	[-1]	Group05	7.14286	11	None Specific Cluster	[CACNA1G, KCNK2, LDLR, NR4A1, PLCB4, WNT2]	[CRHR2, NR4A1, PLCB1, WNT7B]	[CAMK2D, NR4A1, WNT10B]	50.9929	33.9953	25.4965	[CACNA1G, CAMK2D, CRHR2, KCNK2, LDLR, NR4A1, PLCB1, PLCB4, WNT10B, WNT2, WNT7B]
KEGG:00190	Oxidative phosphorylation	KEGG_03.10.2018	0.563228	0.719953	0.00481748	0.0160583	[-1]	Group06	8.27068	11	Specific for Cluster #2	[COX7B, NDUFA2, NDUFB3]	[ATP6V0D1, ATP6V1C1, ATP6V1E1, COX7B, NDUFA2, NDUFB10, NDUFB3, NDUFB4, NDUFB5]	[ATP6V0D2, COX6C]	24.7805	74.3415	16.5203	[ATP6V0D1, ATP6V0D2, ATP6V1C1, ATP6V1E1, COX6C, COX7B, NDUFA2, NDUFB10, NDUFB3, NDUFB4, NDUFB5]
KEGG:04714	Thermogenesis	KEGG_03.10.2018	0.000768419	0.00594514	0.00481748	0.0160583	[-1]	Group06	3.93013	9	None Specific Cluster	[COX7B, CPT1A, NDUFA2, NDUFB3, PRKG2]	[COX7B, NDUFA2, NDUFB10, NDUFB3, NDUFB4, NDUFB5]	[COX6C]	49.1238	58.9485	9.82476	[COX6C, COX7B, CPT1A, NDUFA2, NDUFB10, NDUFB3, NDUFB4, NDUFB5, PRKG2]
KEGG:04932	Non-alcoholic fatty liver disease (NAFLD)	KEGG_03.10.2018	0.681009	0.82056	0.00481748	0.0160583	[-1]	Group06	8.72483	13	None Specific Cluster	[BID, COX7B, CXCL8, FAS, JUN, NDUFA2, NDUFB3]	[COX7B, IL1A, NDUFA2, NDUFB10, NDUFB3, NDUFB4, NDUFB5, SOCS3]	[COX6C, CXCL8, FAS]	47.7837	54.6099	20.4787	[BID, COX6C, COX7B, CXCL8, FAS, IL1A, JUN, NDUFA2, NDUFB10, NDUFB3, NDUFB4, NDUFB5, SOCS3]
KEGG:05010	Alzheimer disease	KEGG_03.10.2018	0.520532	0.683199	0.00481748	0.0160583	[-1]	Group06	8.18713	14	None Specific Cluster	[BID, COX7B, FAS, GRIN2B, NDUFA2, NDUFB3, PLCB4]	[CDK5, COX7B, GRIN2A, NDUFA2, NDUFB10, NDUFB3, NDUFB4, NDUFB5, PLCB1]	[COX6C, FAS, GRIN2B]	44.8143	57.6183	19.2061	[BID, CDK5, COX6C, COX7B, FAS, GRIN2A, GRIN2B, NDUFA2, NDUFB10, NDUFB3, NDUFB4, NDUFB5, PLCB1, PLCB4]
KEGG:05012	Parkinson disease	KEGG_03.10.2018	0.401494	0.602241	0.00481748	0.0160583	[-1]	Group06	7.74648	11	None Specific Cluster	[COX7B, NDUFA2, NDUFB3, SLC25A4, UBE2L6]	[COX7B, GNAL, NDUFA2, NDUFB10, NDUFB3, NDUFB4, NDUFB5]	[COX6C, GPR37]	41.3008	57.8212	16.5203	[COX6C, COX7B, GNAL, GPR37, NDUFA2, NDUFB10, NDUFB3, NDUFB4, NDUFB5, SLC25A4, UBE2L6]
KEGG:05016	Huntington disease	KEGG_03.10.2018	0.46879	0.650114	0.00481748	0.0160583	[-1]	Group06	8.29016	16	None Specific Cluster	[BDNF, COX7B, DNAH8, GRIN2B, NDUFA2, NDUFB3, PLCB4, SLC25A4, SOD2]	[BDNF, COX7B, DNALI1, NDUFA2, NDUFB10, NDUFB3, NDUFB4, NDUFB5, PLCB1]	[BDNF, COX6C, DNAH7, DNALI1, GRIN2B, SOD2]	49.0735	49.0735	32.7156	[BDNF, COX6C, COX7B, DNAH7, DNAH8, DNALI1, GRIN2B, NDUFA2, NDUFB10, NDUFB3, NDUFB4, NDUFB5, PLCB1, PLCB4, SLC25A4, SOD2]
KEGG:00140	Steroid hormone biosynthesis	KEGG_03.10.2018	0.00181669	0.0111272	0.00151835	0.0151835	[-1]	Group07	23.7288	14	None Specific Cluster	[AKR1C1, AKR1C2, CYP1B1, CYP3A5, UGT2B10, UGT2B7]	[AKR1C1, AKR1C2, AKR1C3, CYP1B1, HSD17B3, HSD17B6, STS]	[AKR1C1, AKR1C2, CYP1A1, CYP1B1, CYP3A5, CYP7A1, HSD17B6, SULT1E1, UGT2B28]	36.5904	42.6888	54.8856	[AKR1C1, AKR1C2, AKR1C3, CYP1A1, CYP1B1, CYP3A5, CYP7A1, HSD17B3, HSD17B6, STS, SULT1E1, UGT2B10, UGT2B28, UGT2B7]
KEGG:00830	Retinol metabolism	KEGG_03.10.2018	0.021956	0.092215	0.00151835	0.0151835	[-1]	Group07	19.403	13	None Specific Cluster	[ADH1B, ADH7, CYP3A5, UGT2B10, UGT2B7]	[ADH1B, ALDH1A1, HSD17B6, RETSAT, RPE65, SDR16C5]	[CYP1A1, CYP3A5, HSD17B6, RDH10, RETSAT, UGT2B28]	34.8198	41.7837	41.7837	[ADH1B, ADH7, ALDH1A1, CYP1A1, CYP3A5, HSD17B6, RDH10, RETSAT, RPE65, SDR16C5, UGT2B10, UGT2B28, UGT2B7]
KEGG:00980	Metabolism of xenobiotics by cytochrome P450	KEGG_03.10.2018	0.121773	0.279698	0.00151835	0.0151835	[-1]	Group07	15.7895	12	Specific for Cluster #1	[ADH1B, ADH7, AKR1C1, CYP1B1, CYP3A5, GSTM1, GSTM5, GSTT1, UGT2B10, UGT2B7]	[ADH1B, AKR1C1, CYP1B1, GSTM1, GSTM5, GSTT1]	[AKR1C1, CYP1A1, CYP1B1, CYP3A5, GSTM1, GSTM5, GSTT1, UGT2B28]	65.158	39.0948	52.1264	[ADH1B, ADH7, AKR1C1, CYP1A1, CYP1B1, CYP3A5, GSTM1, GSTM5, GSTT1, UGT2B10, UGT2B28, UGT2B7]
KEGG:00982	Drug metabolism	KEGG_03.10.2018	0.0160374	0.0693382	0.00151835	0.0151835	[-1]	Group07	19.4444	14	Specific for Cluster #1	[ADH1B, ADH7, CYP3A5, FMO1, FMO2, GSTM1, GSTM5, GSTT1, UGT2B10, UGT2B7]	[ADH1B, FMO2, FMO3, GSTM1, GSTM5, GSTT1]	[CYP3A5, FMO4, GSTM1, GSTM5, GSTT1, MAOB, UGT2B28]	60.1194	36.0717	42.0836	[ADH1B, ADH7, CYP3A5, FMO1, FMO2, FMO3, FMO4, GSTM1, GSTM5, GSTT1, MAOB, UGT2B10, UGT2B28, UGT2B7]
KEGG:00983	Drug metabolism	KEGG_03.10.2018	0.70609	0.830362	0.00151835	0.0151835	[-1]	Group07	11.3924	9	None Specific Cluster	[GSTM1, GSTM5, GSTT1, UGT2B10, UGT2B7]	[CES1, GSTM1, GSTM5, GSTT1, HPRT1]	[GSTM1, GSTM5, GSTT1, UGT2B28, UPP1]	45.076	45.076	45.076	[CES1, GSTM1, GSTM5, GSTT1, HPRT1, UGT2B10, UGT2B28, UGT2B7, UPP1]
KEGG:05204	Chemical carcinogenesis	KEGG_03.10.2018	0.0424182	0.135554	0.00151835	0.0151835	[-1]	Group07	17.0732	14	Specific for Cluster #1	[ADH1B, ADH7, AKR1C2, CYP1B1, CYP3A5, GSTM1, GSTM5, GSTT1, PTGS2, UGT2B10, UGT2B7]	[ADH1B, AKR1C2, CYP1B1, GSTM1, GSTM5, GSTT1, PTGS2]	[AKR1C2, CYP1A1, CYP1B1, CYP3A43, CYP3A5, GSTM1, GSTM5, GSTT1, PTGS2, UGT2B28]	62.2274	39.5993	56.5704	[ADH1B, ADH7, AKR1C2, CYP1A1, CYP1B1, CYP3A43, CYP3A5, GSTM1, GSTM5, GSTT1, PTGS2, UGT2B10, UGT2B28, UGT2B7]
KEGG:04270	Vascular smooth muscle contraction	KEGG_03.10.2018	0.544478	0.708303	0.0409307	0.0818613	[-1]	Group08	11.5702	14	None Specific Cluster	[ADRA1B, EDNRA, KCNMB2, PLA2G2A, PLCB4]	[MRVI1, PLA2G10, PLA2G5, PLCB1, PRKCB, PRKCD, PRKCG]	[ACTG2, KCNMB2, MYH11, PLA2G10, PLA2G2A, PRKCD]	32.609	45.6526	39.1308	[ACTG2, ADRA1B, EDNRA, KCNMB2, MRVI1, MYH11, PLA2G10, PLA2G2A, PLA2G5, PLCB1, PLCB4, PRKCB, PRKCD, PRKCG]
KEGG:04540	Gap junction	KEGG_03.10.2018	0.152783	0.316326	0.0409307	0.0818613	[-1]	Group08	14.7727	13	None Specific Cluster	[GJA1, PDGFRA, PLCB4, PRKG2, TUBB2B]	[CDK1, GJA1, HTR2A, HTR2C, PDGFD, PLCB1, PRKCB, PRKCG]	[CDK1, GJA1, HTR2A, PDGFRA, TUBB4A]	34.1312	54.6099	34.1312	[CDK1, GJA1, HTR2A, HTR2C, PDGFD, PDGFRA, PLCB1, PLCB4, PRKCB, PRKCG, PRKG2, TUBB2B, TUBB4A]
KEGG:04713	Circadian entrainment	KEGG_03.10.2018	0.236346	0.434285	0.0409307	0.0818613	[-1]	Group08	13.5417	13	None Specific Cluster	[CACNA1G, FOS, GRIN2B, PLCB4, PRKG2, RYR1]	[FOS, GRIN2A, KCNJ6, PLCB1, PRKCB, PRKCG]	[CAMK2D, GNG2, GRIN2B]	43.7149	43.7149	21.8575	[CACNA1G, CAMK2D, FOS, GNG2, GRIN2A, GRIN2B, KCNJ6, PLCB1, PLCB4, PRKCB, PRKCG, PRKG2, RYR1]
KEGG:04724	Glutamatergic synapse	KEGG_03.10.2018	0.432812	0.629935	0.0409307	0.0818613	[-1]	Group08	12.2807	14	None Specific Cluster	[GRIK1, GRIN2B, HOMER1, PLCB4, SLC17A7]	[GRIN2A, HOMER1, PLCB1, PRKCB, PRKCG, SHANK3, SLC17A6]	[GNG2, GRIN2B, HOMER1, SHANK1, SLC17A6, SLC17A7, SLC38A3]	32.0102	44.8143	44.8143	[GNG2, GRIK1, GRIN2A, GRIN2B, HOMER1, PLCB1, PLCB4, PRKCB, PRKCG, SHANK1, SHANK3, SLC17A6, SLC17A7, SLC38A3]
KEGG:04725	Cholinergic synapse	KEGG_03.10.2018	0.874148	0.931158	0.0409307	0.0818613	[-1]	Group08	8.92857	10	Specific for Cluster #2	[CHRNB2, FOS, PLCB4]	[CHRNB2, FOS, KCNJ6, KCNQ5, PLCB1, PRKCB, PRKCG]	[CAMK2D, GNG2]	27.7989	64.864	18.5326	[CAMK2D, CHRNB2, FOS, GNG2, KCNJ6, KCNQ5, PLCB1, PLCB4, PRKCB, PRKCG]
KEGG:04726	Serotonergic synapse	KEGG_03.10.2018	0.435965	0.628302	0.0409307	0.0818613	[-1]	Group08	12.1739	14	Specific for Cluster #2	[PLCB4, PTGS2]	[HTR1A, HTR1D, HTR2A, HTR2C, HTR3B, KCNJ6, PLCB1, PRKCB, PRKCG, PTGS2]	[GNG2, HTR1F, HTR2A, MAOB, PTGS2]	13.3067	66.5337	33.2668	[GNG2, HTR1A, HTR1D, HTR1F, HTR2A, HTR2C, HTR3B, KCNJ6, MAOB, PLCB1, PLCB4, PRKCB, PRKCG, PTGS2]
KEGG:04728	Dopaminergic synapse	KEGG_03.10.2018	0.770622	0.878151	0.0409307	0.0818613	[-1]	Group08	10.687	14	None Specific Cluster	[DRD5, FOS, GRIN2B, PLCB4]	[FOS, GNAL, GRIN2A, KCNJ6, PLCB1, PRKCB, PRKCG]	[CAMK2D, GNG2, GRIN2B, MAOB, SCN1A]	27.1954	47.5919	33.9942	[CAMK2D, DRD5, FOS, GNAL, GNG2, GRIN2A, GRIN2B, KCNJ6, MAOB, PLCB1, PLCB4, PRKCB, PRKCG, SCN1A]
KEGG:04750	Inflammatory mediator regulation of TRP channels	KEGG_03.10.2018	0.867312	0.937462	0.0409307	0.0818613	[-1]	Group08	9.09091	9	Specific for Cluster #2	[PLCB4]	[HTR2A, HTR2C, IL1R1, PLCB1, PRKCB, PRKCD, PRKCG]	[CAMK2D, HTR2A, IL1R1, PRKCD]	9.82476	68.7733	39.299	[CAMK2D, HTR2A, HTR2C, IL1R1, PLCB1, PLCB4, PRKCB, PRKCD, PRKCG]
KEGG:04911	Insulin secretion	KEGG_03.10.2018	0.586452	0.736824	0.0409307	0.0818613	[-1]	Group08	11.7647	10	None Specific Cluster	[KCNMB2, PLCB4]	[ADCYAP1, ATP1A3, PLCB1, PRKCB, PRKCG, SNAP25]	[CAMK2D, KCNMB2, SLC2A1]	19.2051	57.6152	28.8076	[ADCYAP1, ATP1A3, CAMK2D, KCNMB2, PLCB1, PLCB4, PRKCB, PRKCG, SLC2A1, SNAP25]
KEGG:04918	Thyroid hormone synthesis	KEGG_03.10.2018	0.082398	0.216295	0.0409307	0.0818613	[-1]	Group08	16.2162	12	None Specific Cluster	[GPX8, PLCB4, TSHB, TTR]	[ATP1A3, PLCB1, PRKCB, PRKCG, TTR]	[GPX3, LRP2, SLC26A4, SLC5A5, TTR]	31.3863	39.2329	39.2329	[ATP1A3, GPX3, GPX8, LRP2, PLCB1, PLCB4, PRKCB, PRKCG, SLC26A4, SLC5A5, TSHB, TTR]
KEGG:04921	Oxytocin signaling pathway	KEGG_03.10.2018	0.49579	0.668634	0.0409307	0.0818613	[-1]	Group08	11.8421	18	Specific for Cluster #2	[CACNG3, CD38, FOS, JUN, PLCB4, PTGS2, RYR1]	[CACNB3, CACNB4, CACNG3, CAMK1D, CAMK1G, CD38, FOS, KCNJ6, PLCB1, PRKCB, PRKCG, PTGS2, RGS2]	[CACNG4, CAMK2D, CD38, PTGS2]	35.3686	65.6846	20.2106	[CACNB3, CACNB4, CACNG3, CACNG4, CAMK1D, CAMK1G, CAMK2D, CD38, FOS, JUN, KCNJ6, PLCB1, PLCB4, PRKCB, PRKCG, PTGS2, RGS2, RYR1]
KEGG:04925	Aldosterone synthesis and secretion	KEGG_03.10.2018	0.0858651	0.221441	0.0409307	0.0818613	[-1]	Group08	15.625	15	Specific for Cluster #2	[CACNA1G, LDLR, NR4A1, NR4A2, PDE2A, PLCB4]	[ATP1A3, ATP2B2, ATP2B3, CAMK1D, CAMK1G, NR4A1, NR4A2, PDE2A, PLCB1, PRKCB, PRKCG]	[CAMK2D, NR4A1, NR4A2, PDE2A]	35.5793	65.2287	23.7195	[ATP1A3, ATP2B2, ATP2B3, CACNA1G, CAMK1D, CAMK1G, CAMK2D, LDLR, NR4A1, NR4A2, PDE2A, PLCB1, PLCB4, PRKCB, PRKCG]
KEGG:04928	Parathyroid hormone synthesis, secretion and action	KEGG_03.10.2018	1	1	0.0409307	0.0818613	[-1]	Group08	9.43396	10	Specific for Cluster #2	[EGR1, FOS, NR4A2, PLCB4]	[FOS, JUND, KL, NR4A2, PLCB1, PRKCB, PRKCG, PTHLH]	[NR4A2]	35.9085	71.8169	8.97712	[EGR1, FOS, JUND, KL, NR4A2, PLCB1, PLCB4, PRKCB, PRKCG, PTHLH]
KEGG:04961	Endocrine and other factor-regulated calcium reabsorption	KEGG_03.10.2018	0.324869	0.536581	0.0409307	0.0818613	[-1]	Group08	14.8936	7	Specific for Cluster #2	[CALB1, PLCB4]	[ATP1A3, KL, PLCB1, PRKCB, PRKCG]	[CALB1]	26.7367	66.8418	13.3684	[ATP1A3, CALB1, KL, PLCB1, PLCB4, PRKCB, PRKCG]
KEGG:04970	Salivary secretion	KEGG_03.10.2018	0.291443	0.498164	0.0409307	0.0818613	[-1]	Group08	13.3333	12	Specific for Cluster #2	[ADRA1B, CD38, LYZ, PLCB4, PRKG2]	[ATP1A3, ATP2B2, ATP2B3, CD38, CST4, LYZ, PLCB1, PRKCB, PRKCG]	[CD38, LYZ]	37.3434	67.218	14.9373	[ADRA1B, ATP1A3, ATP2B2, ATP2B3, CD38, CST4, LYZ, PLCB1, PLCB4, PRKCB, PRKCG, PRKG2]
KEGG:04971	Gastric acid secretion	KEGG_03.10.2018	0.335113	0.541336	0.0409307	0.0818613	[-1]	Group08	13.3333	10	None Specific Cluster	[CCKBR, KCNK2, PLCB4, SST]	[ATP1A3, CCKBR, KCNJ16, PLCB1, PRKCB, PRKCG]	[CAMK2D, KCNJ16, SST]	35.9085	53.8627	26.9314	[ATP1A3, CAMK2D, CCKBR, KCNJ16, KCNK2, PLCB1, PLCB4, PRKCB, PRKCG, SST]
KEGG:04972	Pancreatic secretion	KEGG_03.10.2018	0.236346	0.434285	0.0409307	0.0818613	[-1]	Group08	13.5417	13	Specific for Cluster #2	[CD38, PLA2G2A, PLCB4, SLC4A4]	[ATP1A3, ATP2B2, ATP2B3, CD38, PLA2G10, PLA2G5, PLCB1, PRKCB, PRKCG, RAB27B]	[CD38, PLA2G10, PLA2G2A, RAB27B]	27.305	68.2624	27.305	[ATP1A3, ATP2B2, ATP2B3, CD38, PLA2G10, PLA2G2A, PLA2G5, PLCB1, PLCB4, PRKCB, PRKCG, RAB27B, SLC4A4]
KEGG:05031	Amphetamine addiction	KEGG_03.10.2018	0.221359	0.411896	0.0409307	0.0818613	[-1]	Group08	14.7059	10	None Specific Cluster	[ARC, FOS, GRIN2B, JUN, PDYN]	[FOS, GRIN2A, PDYN, PRKCB, PRKCG]	[CAMK2D, GRIN2B, MAOB, PDYN]	43.6251	43.6251	34.9001	[ARC, CAMK2D, FOS, GRIN2A, GRIN2B, JUN, MAOB, PDYN, PRKCB, PRKCG]
KEGG:04145	Phagosome	KEGG_03.10.2018	8.34269e-08	6.13188e-06	0.0080844	0.020211	[-1]	Group09	25	38	None Specific Cluster	[C3, FCGR2A, HLA-A, HLA-DMB, HLA-DPA1, HLA-DQA1, HLA-DRA, HLA-G, ITGA5, MRC1, OLR1, PLA2R1, TAP2, TFRC, THBS1, TUBB2B]	[ATP6V0D1, ATP6V1C1, ATP6V1E1, COLEC12, FCAR, FCGR2B, HLA-DOB, HLA-DPA1, HLA-DPB1, HLA-DQA1, HLA-DRA, ITGB3, MSR1, OLR1, THBS1]	[ATP6V0D2, C3, CD36, COLEC12, CORO1A, CTSL, CTSS, CYBB, FCGR2A, FCGR2B, HLA-DMA, HLA-DMB, HLA-DPA1, HLA-DPB1, HLA-DQA1, HLA-DRA, ITGA2, ITGB3, LAMP2, MRC2, MSR1, TFRC, TLR2, TUBB4A]	38.2203	35.8315	57.3305	[ATP6V0D1, ATP6V0D2, ATP6V1C1, ATP6V1E1, C3, CD36, COLEC12, CORO1A, CTSL, CTSS, CYBB, FCAR, FCGR2A, FCGR2B, HLA-A, HLA-DMA, HLA-DMB, HLA-DOB, HLA-DPA1, HLA-DPB1, HLA-DQA1, HLA-DRA, HLA-G, ITGA2, ITGA5, ITGB3, LAMP2, MRC1, MRC2, MSR1, OLR1, PLA2R1, TAP2, TFRC, THBS1, TLR2, TUBB2B, TUBB4A]
KEGG:04514	Cell adhesion molecules (CAMs)	KEGG_03.10.2018	0.0248471	0.0987169	0.0080844	0.020211	[-1]	Group09	15.9722	23	None Specific Cluster	[CLDN11, HLA-A, HLA-DMB, HLA-DPA1, HLA-DQA1, HLA-DRA, HLA-G, ICAM1, MAG, MPZ, PTPRC, SDC4, SELE, VCAM1]	[HLA-DOB, HLA-DPA1, HLA-DPB1, HLA-DQA1, HLA-DRA, LRRC4B, NLGN4Y, NRXN3, NTNG1, VCAM1]	[CLDN24, HLA-DMA, HLA-DMB, HLA-DPA1, HLA-DPB1, HLA-DQA1, HLA-DRA, ICAM1, ICAM2, MAG, SELE]	53.6814	38.3439	42.1783	[CLDN11, CLDN24, HLA-A, HLA-DMA, HLA-DMB, HLA-DOB, HLA-DPA1, HLA-DPB1, HLA-DQA1, HLA-DRA, HLA-G, ICAM1, ICAM2, LRRC4B, MAG, MPZ, NLGN4Y, NRXN3, NTNG1, PTPRC, SDC4, SELE, VCAM1]
KEGG:04612	Antigen processing and presentation	KEGG_03.10.2018	0.000785371	0.00577248	0.0080844	0.020211	[-1]	Group09	23.3766	18	None Specific Cluster	[B2M, HLA-A, HLA-DMB, HLA-DPA1, HLA-DQA1, HLA-DRA, HLA-G, KLRC1, KLRC3, TAP2]	[HLA-DOB, HLA-DPA1, HLA-DPB1, HLA-DQA1, HLA-DRA, HSPA1A, KLRC3, KLRC4]	[B2M, CTSL, CTSS, HLA-DMA, HLA-DMB, HLA-DPA1, HLA-DPB1, HLA-DQA1, HLA-DRA, HSPA2, KLRC3]	47.687	38.1496	52.4557	[B2M, CTSL, CTSS, HLA-A, HLA-DMA, HLA-DMB, HLA-DOB, HLA-DPA1, HLA-DPB1, HLA-DQA1, HLA-DRA, HLA-G, HSPA1A, HSPA2, KLRC1, KLRC3, KLRC4, TAP2]
KEGG:04640	Hematopoietic cell lineage	KEGG_03.10.2018	0.00180066	0.0115086	0.0080844	0.020211	[-1]	Group09	20.6186	20	Specific for Cluster #3	[CD38, CD44, HLA-DMB, HLA-DPA1, HLA-DQA1, HLA-DRA, ITGA5, TFRC]	[CD24, CD38, CD44, CR1, HLA-DOB, HLA-DPA1, HLA-DPB1, HLA-DQA1, HLA-DRA, IL1A, IL1R1, IL1R2, ITGB3]	[CD24, CD36, CD38, CD44, CR1, CSF1, HLA-DMA, HLA-DMB, HLA-DPA1, HLA-DPB1, HLA-DQA1, HLA-DRA, IL1R1, ITGA2, ITGB3, TFRC]	33.1853	53.9261	66.3705	[CD24, CD36, CD38, CD44, CR1, CSF1, HLA-DMA, HLA-DMB, HLA-DOB, HLA-DPA1, HLA-DPB1, HLA-DQA1, HLA-DRA, IL1A, IL1R1, IL1R2, ITGA2, ITGA5, ITGB3, TFRC]
KEGG:04658	Th1 and Th2 cell differentiation	KEGG_03.10.2018	0.381435	0.590221	0.0080844	0.020211	[-1]	Group09	13.0435	12	None Specific Cluster	[FOS, HLA-DMB, HLA-DPA1, HLA-DQA1, HLA-DRA, IL2RG, JUN, STAT1]	[FOS, HLA-DOB, HLA-DPA1, HLA-DPB1, HLA-DQA1, HLA-DRA, IL12RB2]	[HLA-DMA, HLA-DMB, HLA-DPA1, HLA-DPB1, HLA-DQA1, HLA-DRA, IL12RB2]	53.5937	46.8945	46.8945	[FOS, HLA-DMA, HLA-DMB, HLA-DOB, HLA-DPA1, HLA-DPB1, HLA-DQA1, HLA-DRA, IL12RB2, IL2RG, JUN, STAT1]
KEGG:04659	Th17 cell differentiation	KEGG_03.10.2018	0.630274	0.778574	0.0080844	0.020211	[-1]	Group09	11.215	12	None Specific Cluster	[FOS, HLA-DMB, HLA-DPA1, HLA-DQA1, HLA-DRA, IL2RG, JUN, STAT1]	[FOS, HLA-DOB, HLA-DPA1, HLA-DPB1, HLA-DQA1, HLA-DRA, IL1R1]	[HLA-DMA, HLA-DMB, HLA-DPA1, HLA-DPB1, HLA-DQA1, HLA-DRA, IL1R1]	53.5937	46.8945	46.8945	[FOS, HLA-DMA, HLA-DMB, HLA-DOB, HLA-DPA1, HLA-DPB1, HLA-DQA1, HLA-DRA, IL1R1, IL2RG, JUN, STAT1]
KEGG:04672	Intestinal immune network for IgA production	KEGG_03.10.2018	0.151198	0.317515	0.0080844	0.020211	[-1]	Group09	16.3265	8	Specific for Cluster #3	[HLA-DMB, HLA-DPA1, HLA-DQA1, HLA-DRA]	[CXCR4, HLA-DOB, HLA-DPA1, HLA-DPB1, HLA-DQA1, HLA-DRA]	[CXCR4, HLA-DMA, HLA-DMB, HLA-DPA1, HLA-DPB1, HLA-DQA1, HLA-DRA]	36.6976	55.0464	64.2208	[CXCR4, HLA-DMA, HLA-DMB, HLA-DOB, HLA-DPA1, HLA-DPB1, HLA-DQA1, HLA-DRA]
KEGG:04940	Type I diabetes mellitus	KEGG_03.10.2018	0.000214256	0.00242274	0.0080844	0.020211	[-1]	Group09	30.2326	13	None Specific Cluster	[FAS, GZMB, HLA-A, HLA-DMB, HLA-DPA1, HLA-DQA1, HLA-DRA, HLA-G]	[HLA-DOB, HLA-DPA1, HLA-DPB1, HLA-DQA1, HLA-DRA, IL1A, PTPRN]	[FAS, HLA-DMA, HLA-DMB, HLA-DPA1, HLA-DPB1, HLA-DQA1, HLA-DRA]	51.0647	44.6816	44.6816	[FAS, GZMB, HLA-A, HLA-DMA, HLA-DMB, HLA-DOB, HLA-DPA1, HLA-DPB1, HLA-DQA1, HLA-DRA, HLA-G, IL1A, PTPRN]
KEGG:05140	Leishmaniasis	KEGG_03.10.2018	9.83743e-05	0.00131464	0.0080844	0.020211	[-1]	Group09	25.6757	19	None Specific Cluster	[C3, FCGR2A, FOS, HLA-DMB, HLA-DPA1, HLA-DQA1, HLA-DRA, JUN, PTGS2, STAT1]	[CR1, FOS, HLA-DOB, HLA-DPA1, HLA-DPB1, HLA-DQA1, HLA-DRA, IL1A, PRKCB, PTGS2]	[C3, CR1, CYBB, FCGR2A, HLA-DMA, HLA-DMB, HLA-DPA1, HLA-DPB1, HLA-DQA1, HLA-DRA, NOS2, PTGS2, TLR2]	44.3215	44.3215	57.618	[C3, CR1, CYBB, FCGR2A, FOS, HLA-DMA, HLA-DMB, HLA-DOB, HLA-DPA1, HLA-DPB1, HLA-DQA1, HLA-DRA, IL1A, JUN, NOS2, PRKCB, PTGS2, STAT1, TLR2]
KEGG:05145	Toxoplasmosis	KEGG_03.10.2018	0.269343	0.477029	0.0080844	0.020211	[-1]	Group09	13.2743	15	None Specific Cluster	[HLA-DMB, HLA-DPA1, HLA-DQA1, HLA-DRA, LDLR, STAT1]	[HLA-DOB, HLA-DPA1, HLA-DPB1, HLA-DQA1, HLA-DRA, HSPA1A, LAMA4, LY96]	[HLA-DMA, HLA-DMB, HLA-DPA1, HLA-DPB1, HLA-DQA1, HLA-DRA, HSPA2, NOS2, TLR2]	34.547	46.0627	51.8205	[HLA-DMA, HLA-DMB, HLA-DOB, HLA-DPA1, HLA-DPB1, HLA-DQA1, HLA-DRA, HSPA1A, HSPA2, LAMA4, LDLR, LY96, NOS2, STAT1, TLR2]
KEGG:05150	Staphylococcus aureus infection	KEGG_03.10.2018	8.77332e-05	0.0018424	0.0080844	0.020211	[-1]	Group09	28.5714	16	Specific for Cluster #3	[C1S, C3, FCGR2A, HLA-DMB, HLA-DPA1, HLA-DQA1, HLA-DRA, ICAM1]	[CFH, FCAR, FCGR2B, HLA-DOB, HLA-DPA1, HLA-DPB1, HLA-DQA1, HLA-DRA, MASP1]	[C1S, C3, CFH, CFI, FCGR2A, FCGR2B, HLA-DMA, HLA-DMB, HLA-DPA1, HLA-DPB1, HLA-DQA1, HLA-DRA, ICAM1]	40.759	45.8539	66.2334	[C1S, C3, CFH, CFI, FCAR, FCGR2A, FCGR2B, HLA-DMA, HLA-DMB, HLA-DOB, HLA-DPA1, HLA-DPB1, HLA-DQA1, HLA-DRA, ICAM1, MASP1]
KEGG:05152	Tuberculosis	KEGG_03.10.2018	0.0323622	0.118931	0.0080844	0.020211	[-1]	Group09	15.0838	27	Specific for Cluster #3	[BID, C3, FCGR2A, HLA-DMB, HLA-DPA1, HLA-DQA1, HLA-DRA, MRC1, PLA2R1, STAT1]	[ATP6V0D1, CR1, FCGR2B, HLA-DOB, HLA-DPA1, HLA-DPB1, HLA-DQA1, HLA-DRA, IL18, IL1A]	[ATP6V0D2, C3, CAMK2D, CLEC4E, CORO1A, CR1, CTSS, FCGR2A, FCGR2B, HLA-DMA, HLA-DMB, HLA-DPA1, HLA-DPB1, HLA-DQA1, HLA-DRA, IL18, LAMP2, MRC2, NOS2, TLR2]	33.0908	33.0908	66.1816	[ATP6V0D1, ATP6V0D2, BID, C3, CAMK2D, CLEC4E, CORO1A, CR1, CTSS, FCGR2A, FCGR2B, HLA-DMA, HLA-DMB, HLA-DOB, HLA-DPA1, HLA-DPB1, HLA-DQA1, HLA-DRA, IL18, IL1A, LAMP2, MRC1, MRC2, NOS2, PLA2R1, STAT1, TLR2]
KEGG:05166	Human T-cell leukemia virus 1 infection	KEGG_03.10.2018	0.461652	0.652528	0.0080844	0.020211	[-1]	Group09	11.3725	29	None Specific Cluster	[CCNB2, EGR1, EGR2, FOS, HLA-A, HLA-DMB, HLA-DPA1, HLA-DQA1, HLA-DRA, HLA-G, ICAM1, IL2RG, JUN, PDGFRA, PTTG2, SLC25A4, VCAM1, WNT2, ZFP36]	[FOS, HLA-DOB, HLA-DPA1, HLA-DPB1, HLA-DQA1, HLA-DRA, IL1R1, IL1R2, VCAM1, WNT7B, ZFP36]	[EGR2, ETS2, HLA-DMA, HLA-DMB, HLA-DPA1, HLA-DPB1, HLA-DQA1, HLA-DRA, ICAM1, IL1R1, PDGFRA, RRAS, SLC2A1, WNT10B]	58.2994	33.7523	42.9574	[CCNB2, EGR1, EGR2, ETS2, FOS, HLA-A, HLA-DMA, HLA-DMB, HLA-DOB, HLA-DPA1, HLA-DPB1, HLA-DQA1, HLA-DRA, HLA-G, ICAM1, IL1R1, IL1R2, IL2RG, JUN, PDGFRA, PTTG2, RRAS, SLC25A4, SLC2A1, VCAM1, WNT10B, WNT2, WNT7B, ZFP36]
KEGG:05310	Asthma	KEGG_03.10.2018	0.0318704	0.120127	0.0080844	0.020211	[-1]	Group09	22.5806	7	Specific for Cluster #3	[HLA-DMB, HLA-DPA1, HLA-DQA1, HLA-DRA]	[HLA-DOB, HLA-DPA1, HLA-DPB1, HLA-DQA1, HLA-DRA]	[HLA-DMA, HLA-DMB, HLA-DPA1, HLA-DPB1, HLA-DQA1, HLA-DRA]	41.0609	51.3261	61.5913	[HLA-DMA, HLA-DMB, HLA-DOB, HLA-DPA1, HLA-DPB1, HLA-DQA1, HLA-DRA]
KEGG:05320	Autoimmune thyroid disease	KEGG_03.10.2018	0.0091243	0.0419148	0.0080844	0.020211	[-1]	Group09	22.6415	12	Specific for Cluster #1	[FAS, GZMB, HLA-A, HLA-DMB, HLA-DPA1, HLA-DQA1, HLA-DRA, HLA-G, TSHB]	[HLA-DOB, HLA-DPA1, HLA-DPB1, HLA-DQA1, HLA-DRA]	[FAS, HLA-DMA, HLA-DMB, HLA-DPA1, HLA-DPB1, HLA-DQA1, HLA-DRA]	61.2142	34.0079	47.611	[FAS, GZMB, HLA-A, HLA-DMA, HLA-DMB, HLA-DOB, HLA-DPA1, HLA-DPB1, HLA-DQA1, HLA-DRA, HLA-G, TSHB]
KEGG:05321	Inflammatory bowel disease (IBD)	KEGG_03.10.2018	0.000572108	0.00467222	0.0080844	0.020211	[-1]	Group09	24.6154	16	None Specific Cluster	[HLA-DMB, HLA-DPA1, HLA-DQA1, HLA-DRA, IL2RG, JUN, STAT1]	[HLA-DOB, HLA-DPA1, HLA-DPB1, HLA-DQA1, HLA-DRA, IL12RB2, IL18, IL18RAP, IL1A, TLR5]	[HLA-DMA, HLA-DMB, HLA-DPA1, HLA-DPB1, HLA-DQA1, HLA-DRA, IL12RB2, IL18, IL18RAP, TLR2, TLR5]	36.4026	52.0036	57.204	[HLA-DMA, HLA-DMB, HLA-DOB, HLA-DPA1, HLA-DPB1, HLA-DQA1, HLA-DRA, IL12RB2, IL18, IL18RAP, IL1A, IL2RG, JUN, STAT1, TLR2, TLR5]
KEGG:05323	Rheumatoid arthritis	KEGG_03.10.2018	4.7339e-07	2.31961e-05	0.0080844	0.020211	[-1]	Group09	28.8889	26	None Specific Cluster	[CCL2, CCL20, CCL5, CXCL8, FOS, HLA-DMB, HLA-DPA1, HLA-DQA1, HLA-DRA, ICAM1, JUN, MMP3, VEGFA]	[ANGPT1, ATP6V0D1, ATP6V1C1, ATP6V1E1, CCL2, FOS, HLA-DOB, HLA-DPA1, HLA-DPB1, HLA-DQA1, HLA-DRA, IL18, IL1A, MMP3, VEGFA]	[ATP6V0D2, CCL2, CCL5, CSF1, CTSL, CXCL8, HLA-DMA, HLA-DMB, HLA-DPA1, HLA-DPB1, HLA-DQA1, HLA-DRA, ICAM1, IL18, MMP3, TLR2, VEGFA]	42.7947	49.3785	55.9622	[ANGPT1, ATP6V0D1, ATP6V0D2, ATP6V1C1, ATP6V1E1, CCL2, CCL20, CCL5, CSF1, CTSL, CXCL8, FOS, HLA-DMA, HLA-DMB, HLA-DOB, HLA-DPA1, HLA-DPB1, HLA-DQA1, HLA-DRA, ICAM1, IL18, IL1A, JUN, MMP3, TLR2, VEGFA]
KEGG:05330	Allograft rejection	KEGG_03.10.2018	0.00097722	0.00684054	0.0080844	0.020211	[-1]	Group09	28.9474	11	None Specific Cluster	[FAS, GZMB, HLA-A, HLA-DMB, HLA-DPA1, HLA-DQA1, HLA-DRA, HLA-G]	[HLA-DOB, HLA-DPA1, HLA-DPB1, HLA-DQA1, HLA-DRA]	[FAS, HLA-DMA, HLA-DMB, HLA-DPA1, HLA-DPB1, HLA-DQA1, HLA-DRA]	58.2136	36.3835	50.9369	[FAS, GZMB, HLA-A, HLA-DMA, HLA-DMB, HLA-DOB, HLA-DPA1, HLA-DPB1, HLA-DQA1, HLA-DRA, HLA-G]
KEGG:05332	Graft-versus-host disease	KEGG_03.10.2018	0.000124974	0.00153093	0.0080844	0.020211	[-1]	Group09	31.7073	13	None Specific Cluster	[FAS, GZMB, HLA-A, HLA-DMB, HLA-DPA1, HLA-DQA1, HLA-DRA, HLA-G, KLRC1]	[HLA-DOB, HLA-DPA1, HLA-DPB1, HLA-DQA1, HLA-DRA, IL1A]	[FAS, HLA-DMA, HLA-DMB, HLA-DPA1, HLA-DPB1, HLA-DQA1, HLA-DRA]	57.4477	38.2985	44.6816	[FAS, GZMB, HLA-A, HLA-DMA, HLA-DMB, HLA-DOB, HLA-DPA1, HLA-DPB1, HLA-DQA1, HLA-DRA, HLA-G, IL1A, KLRC1]
KEGG:05416	Viral myocarditis	KEGG_03.10.2018	0.0153582	0.0684139	0.0080844	0.020211	[-1]	Group09	20.339	12	None Specific Cluster	[BID, HLA-A, HLA-DMB, HLA-DPA1, HLA-DQA1, HLA-DRA, HLA-G, ICAM1]	[HLA-DOB, HLA-DPA1, HLA-DPB1, HLA-DQA1, HLA-DRA]	[CAV1, HLA-DMA, HLA-DMB, HLA-DPA1, HLA-DPB1, HLA-DQA1, HLA-DRA, ICAM1]	54.4126	34.0079	54.4126	[BID, CAV1, HLA-A, HLA-DMA, HLA-DMB, HLA-DOB, HLA-DPA1, HLA-DPB1, HLA-DQA1, HLA-DRA, HLA-G, ICAM1]
KEGG:00260	Glycine, serine and threonine metabolism	KEGG_03.10.2018	0.289711	0.50103	nan	nan	[-1]	None	15	6	Specific for Cluster #3	[CHDH]	[CHDH, PSPH]	[CHDH, CTH, MAOB, PHGDH, PIPOX]	14.3609	28.7218	71.8045	[CHDH, CTH, MAOB, PHGDH, PIPOX, PSPH]
KEGG:00480	Glutathione metabolism	KEGG_03.10.2018	0.504485	0.674176	nan	nan	[-1]	None	12.5	7	Specific for Cluster #1	[GPX8, GSTM1, GSTM5, GSTT1, LAP3, ODC1]	[GSTM1, GSTM5, GSTT1, ODC1]	[GPX3, GSTM1, GSTM5, GSTT1]	63.2015	42.1343	42.1343	[GPX3, GPX8, GSTM1, GSTM5, GSTT1, LAP3, ODC1]
KEGG:00562	Inositol phosphate metabolism	KEGG_03.10.2018	0.082398	0.216295	nan	nan	[-1]	None	16.2162	12	None Specific Cluster	[FIG4, INPP5A, ITPKB, PIP5K1B, PLCB4]	[PIP5K1C, PLCB1, PLCD4, TPI1]	[ITPKB, PLCD4, PLCE1, PLCH1, SYNJ2]	39.2329	31.3863	39.2329	[FIG4, INPP5A, ITPKB, PIP5K1B, PIP5K1C, PLCB1, PLCB4, PLCD4, PLCE1, PLCH1, SYNJ2, TPI1]
KEGG:00565	Ether lipid metabolism	KEGG_03.10.2018	0.138265	0.307953	nan	nan	[-1]	None	17.0213	8	None Specific Cluster	[LPCAT2, PLA2G2A, UGT8]	[PLA2G10, PLA2G5, PLD3]	[ENPP2, ENPP6, PLA2G10, PLA2G2A, UGT8]	32.5198	32.5198	54.1997	[ENPP2, ENPP6, LPCAT2, PLA2G10, PLA2G2A, PLA2G5, PLD3, UGT8]
KEGG:00860	Porphyrin and chlorophyll metabolism	KEGG_03.10.2018	0.311525	0.52637	nan	nan	[-1]	None	14.2857	6	Specific for Cluster #1	[CP, HCCS, HMOX1, UGT2B10, UGT2B7]	[CP]	[CP, UGT2B28]	71.8045	14.3609	28.7218	[CP, HCCS, HMOX1, UGT2B10, UGT2B28, UGT2B7]
KEGG:03320	PPAR signaling pathway	KEGG_03.10.2018	0.0489402	0.14682	nan	nan	[-1]	None	17.5676	13	Specific for Cluster #1	[ACADL, ANGPTL4, CPT1A, FABP3, FABP4, OLR1, PLIN2, PLTP, SLC27A2]	[ANGPTL4, FABP3, OLR1, PLIN2]	[ANGPTL4, CD36, CYP7A1, FABP3, FABP7, PCK1]	60.3081	26.8036	40.2054	[ACADL, ANGPTL4, CD36, CPT1A, CYP7A1, FABP3, FABP4, FABP7, OLR1, PCK1, PLIN2, PLTP, SLC27A2]
KEGG:04020	Calcium signaling pathway	KEGG_03.10.2018	1.59933e-05	0.000470204	nan	nan	[-1]	None	20.765	38	None Specific Cluster	[ADRA1B, CACNA1G, CCKBR, CD38, DRD5, EDNRA, EDNRB, GNA14, ITPKB, ORAI2, P2RX7, PDGFRA, PLCB4, RYR1, SLC25A4, TACR1]	[ATP2B2, ATP2B3, CCKBR, CD38, CXCR4, GNAL, GRIN2A, HTR2A, HTR2C, NTSR1, ORAI2, PLCB1, PLCD4, PRKCB, PRKCG, TACR3]	[CAMK2D, CD38, CXCR4, F2R, HTR2A, ITPKB, NOS2, ORAI2, P2RX2, PDGFRA, PHKA1, PLCD4, PLCE1, PLN, PTGER3, PTGFR]	39.5643	39.5643	39.5643	[ADRA1B, ATP2B2, ATP2B3, CACNA1G, CAMK2D, CCKBR, CD38, CXCR4, DRD5, EDNRA, EDNRB, F2R, GNA14, GNAL, GRIN2A, HTR2A, HTR2C, ITPKB, NOS2, NTSR1, ORAI2, P2RX2, P2RX7, PDGFRA, PHKA1, PLCB1, PLCB4, PLCD4, PLCE1, PLN, PRKCB, PRKCG, PTGER3, PTGFR, RYR1, SLC25A4, TACR1, TACR3]
KEGG:04022	cGMP-PKG signaling pathway	KEGG_03.10.2018	0.895378	0.926906	nan	nan	[-1]	None	10.4294	17	None Specific Cluster	[ADRA1B, EDNRA, EDNRB, KCNMB2, PDE2A, PLCB4, PRKG2, SLC25A4]	[ADORA3, ATP1A3, ATP2B2, ATP2B3, MRVI1, PDE2A, PDE5A, PLCB1, RGS2]	[KCNMB2, PDE2A, PLN]	44.5059	50.0691	16.6897	[ADORA3, ADRA1B, ATP1A3, ATP2B2, ATP2B3, EDNRA, EDNRB, KCNMB2, MRVI1, PDE2A, PDE5A, PLCB1, PLCB4, PLN, PRKG2, RGS2, SLC25A4]
KEGG:04024	cAMP signaling pathway	KEGG_03.10.2018	0.0721213	0.200035	nan	nan	[-1]	None	14.1414	28	None Specific Cluster	[ARAP3, BDNF, DRD5, EDNRA, FOS, FSHB, FSHR, GRIN2B, JUN, SSTR1]	[ATP1A3, ATP2B2, ATP2B3, BDNF, FOS, FSHR, GABBR2, GRIN2A, HCN2, HTR1A, HTR1D, NPY, VAV3]	[ARAP3, BDNF, CAMK2D, F2R, FSHR, GRIN2B, HTR1F, PLCE1, PLN, PTGER3, RRAS, VIPR2]	33.4728	43.5146	40.1673	[ARAP3, ATP1A3, ATP2B2, ATP2B3, BDNF, CAMK2D, DRD5, EDNRA, F2R, FOS, FSHB, FSHR, GABBR2, GRIN2A, GRIN2B, HCN2, HTR1A, HTR1D, HTR1F, JUN, NPY, PLCE1, PLN, PTGER3, RRAS, SSTR1, VAV3, VIPR2]
KEGG:04060	Cytokine-cytokine receptor interaction	KEGG_03.10.2018	0.04859	0.148807	nan	nan	[-1]	None	13.6054	40	None Specific Cluster	[ACVR1C, BMP3, BMP5, BMP6, CCL2, CCL20, CCL5, CX3CR1, CXCL10, CXCL11, CXCL8, CXCL9, FAS, GH1, IL13RA1, IL13RA2, IL2RG, IL34, INHBA, OSMR]	[BMP6, CCL19, CCL2, CX3CL1, CXCL11, CXCL2, CXCL9, CXCR4, GHR, IL12RB2, IL17RB, IL18, IL18RAP, IL1A, IL1R1, IL1R2, IL1RL1, IL33, INHBA, OSMR, TNFSF10]	[CCL19, CCL2, CCL5, CSF1, CXCL10, CXCL11, CXCL16, CXCL8, CXCL9, CXCR4, FAS, IL12RB2, IL13RA1, IL13RA2, IL18, IL18RAP, IL1R1, IL34, INHBA, PRLR, TNFRSF11B, TNFSF10, XCL2]	44.3494	46.5669	51.0018	[ACVR1C, BMP3, BMP5, BMP6, CCL19, CCL2, CCL20, CCL5, CSF1, CX3CL1, CX3CR1, CXCL10, CXCL11, CXCL16, CXCL2, CXCL8, CXCL9, CXCR4, FAS, GH1, GHR, IL12RB2, IL13RA1, IL13RA2, IL17RB, IL18, IL18RAP, IL1A, IL1R1, IL1R2, IL1RL1, IL2RG, IL33, IL34, INHBA, OSMR, PRLR, TNFRSF11B, TNFSF10, XCL2]
KEGG:04062	Chemokine signaling pathway	KEGG_03.10.2018	0.463947	0.649526	nan	nan	[-1]	None	11.6402	22	None Specific Cluster	[CCL2, CCL20, CCL5, CX3CR1, CXCL10, CXCL11, CXCL8, CXCL9, PLCB4, STAT1, STAT2]	[CCL19, CCL2, CX3CL1, CXCL11, CXCL2, CXCL9, CXCR4, PLCB1, PRKCB, PRKCD, VAV3]	[CCL19, CCL2, CCL5, CXCL10, CXCL11, CXCL16, CXCL8, CXCL9, CXCR4, GNG2, PRKCD, XCL2]	43.8277	43.8277	47.812	[CCL19, CCL2, CCL20, CCL5, CX3CL1, CX3CR1, CXCL10, CXCL11, CXCL16, CXCL2, CXCL8, CXCL9, CXCR4, GNG2, PLCB1, PLCB4, PRKCB, PRKCD, STAT1, STAT2, VAV3, XCL2]
KEGG:04064	NF-kappa B signaling pathway	KEGG_03.10.2018	0.391609	0.59347	nan	nan	[-1]	None	12.6316	12	None Specific Cluster	[CXCL8, DDX58, ICAM1, PTGS2, RIPK1, TNFAIP3, VCAM1]	[CCL19, CXCL2, IL1R1, LY96, PRKCB, PTGS2, VCAM1]	[CCL19, CXCL8, ICAM1, IL1R1, PTGS2]	49.2294	49.2294	35.1638	[CCL19, CXCL2, CXCL8, DDX58, ICAM1, IL1R1, LY96, PRKCB, PTGS2, RIPK1, TNFAIP3, VCAM1]
KEGG:04066	HIF-1 signaling pathway	KEGG_03.10.2018	0.0288601	0.111643	nan	nan	[-1]	None	17	17	None Specific Cluster	[ANGPT2, HMOX1, LDHA, TF, TFRC, TIMP1, VEGFA]	[ANGPT1, EDN1, ELOB, LDHA, PFKFB3, PRKCB, PRKCG, VEGFA]	[ANGPT2, CAMK2D, CYBB, NOS2, SLC2A1, TF, TFRC, VEGFA]	37.2068	42.5221	42.5221	[ANGPT1, ANGPT2, CAMK2D, CYBB, EDN1, ELOB, HMOX1, LDHA, NOS2, PFKFB3, PRKCB, PRKCG, SLC2A1, TF, TFRC, TIMP1, VEGFA]
KEGG:04070	Phosphatidylinositol signaling system	KEGG_03.10.2018	0.736301	0.845596	nan	nan	[-1]	None	11.1111	11	None Specific Cluster	[INPP5A, ITPKB, PIP5K1B, PLCB4]	[PIP5K1C, PLCB1, PLCD4, PRKCB, PRKCG]	[ITPKB, PLCD4, PLCE1, SYNJ2]	33.9953	42.4941	33.9953	[INPP5A, ITPKB, PIP5K1B, PIP5K1C, PLCB1, PLCB4, PLCD4, PLCE1, PRKCB, PRKCG, SYNJ2]
KEGG:04071	Sphingolipid signaling pathway	KEGG_03.10.2018	0.443116	0.632408	nan	nan	[-1]	None	7.62712	9	Specific for Cluster #2	[BID, CERS3, PLCB4]	[ADORA3, PLCB1, PRKCB, PRKCG, SGPP2, SPTLC3]	[CERS3, SPTLC3]	30.5438	61.0876	20.3625	[ADORA3, BID, CERS3, PLCB1, PLCB4, PRKCB, PRKCG, SGPP2, SPTLC3]
KEGG:04072	Phospholipase D signaling pathway	KEGG_03.10.2018	0.578497	0.733095	nan	nan	[-1]	None	8.21918	12	None Specific Cluster	[CXCL8, PDGFRA, PIP5K1B, PLCB4]	[PDGFD, PIP5K1C, PLCB1]	[CXCL8, F2R, LPAR3, LPAR4, PDGFRA, PTGFR, RRAS]	31.3863	23.5397	54.926	[CXCL8, F2R, LPAR3, LPAR4, PDGFD, PDGFRA, PIP5K1B, PIP5K1C, PLCB1, PLCB4, PTGFR, RRAS]
KEGG:04080	Neuroactive ligand-receptor interaction	KEGG_03.10.2018	2.90924e-09	4.27659e-07	nan	nan	[-1]	None	22.0217	61	None Specific Cluster	[ADRA1B, APLNR, CCKBR, CHRNB2, DRD5, EDNRA, EDNRB, FSHB, FSHR, GABRA5, GABRE, GH1, GLP2R, GLRA1, GLRA2, GPR83, GRIK1, GRIN2B, MAS1, MCHR1, NPY4R, P2RX7, P2RY13, P2RY14, RXFP1, RXFP2, SSTR1, TACR1, TSHB]	[ADORA3, APLNR, CCKBR, CHRNA1, CHRNB2, CHRNB3, CRHR2, FSHR, GABBR2, GABRA1, GABRA2, GABRA3, GABRA5, GABRE, GABRG2, GABRQ, GHR, GLP2R, GRIN2A, HTR1A, HTR1D, HTR2A, HTR2C, MAS1, NPY5R, NTSR1, OPRK1, RXFP2, TACR3]	[APLNR, F2R, FSHR, GABRA2, GABRA5, GABRG1, GABRQ, GLP2R, GLRA2, GLRA3, GRIN2B, HTR1F, HTR2A, LPAR3, LPAR4, NMUR2, NPY5R, P2RX2, P2RY14, PRLR, PTGER3, PTGFR, RXFP2, VIPR2]	44.3493	44.3493	36.7029	[ADORA3, ADRA1B, APLNR, CCKBR, CHRNA1, CHRNB2, CHRNB3, CRHR2, DRD5, EDNRA, EDNRB, F2R, FSHB, FSHR, GABBR2, GABRA1, GABRA2, GABRA3, GABRA5, GABRE, GABRG1, GABRG2, GABRQ, GH1, GHR, GLP2R, GLRA1, GLRA2, GLRA3, GPR83, GRIK1, GRIN2A, GRIN2B, HTR1A, HTR1D, HTR1F, HTR2A, HTR2C, LPAR3, LPAR4, MAS1, MCHR1, NMUR2, NPY4R, NPY5R, NTSR1, OPRK1, P2RX2, P2RX7, P2RY13, P2RY14, PRLR, PTGER3, PTGFR, RXFP1, RXFP2, …
KEGG:04115	p53 signaling pathway	KEGG_03.10.2018	0.696056	0.825163	nan	nan	[-1]	None	11.1111	8	Specific for Cluster #1	[BID, CCNB2, FAS, GADD45A, RPRM, THBS1]	[CDK1, THBS1]	[CDK1, FAS, PMAIP1, RPRM]	62.7622	20.9207	41.8414	[BID, CCNB2, CDK1, FAS, GADD45A, PMAIP1, RPRM, THBS1]
KEGG:04141	Protein processing in endoplasmic reticulum	KEGG_03.10.2018	0.0086227	0.0422512	nan	nan	[-1]	None	4.24242	7	Specific for Cluster #3	[ERO1A, MAN1A1]	[HSPA1A, MAN1A1]	[CRYAB, DNAJC5G, HSPA2, MAN1A1, RNF185]	25.3035	25.3035	63.2587	[CRYAB, DNAJC5G, ERO1A, HSPA1A, HSPA2, MAN1A1, RNF185]
KEGG:04142	Lysosome	KEGG_03.10.2018	0.366445	0.573058	nan	nan	[-1]	None	7.31707	9	Specific for Cluster #3	[AP1S1, CTSH, GBA]	[AP1S1, ATP6V0D1, GBA]	[AP1S1, ATP6V0D2, CTSH, CTSL, CTSS, LAMP2, NPC2]	28.5545	28.5545	66.6271	[AP1S1, ATP6V0D1, ATP6V0D2, CTSH, CTSL, CTSS, GBA, LAMP2, NPC2]
KEGG:04144	Endocytosis	KEGG_03.10.2018	0.162277	0.318063	nan	nan	[-1]	None	7.37705	18	None Specific Cluster	[ARAP3, EHD3, HLA-A, HLA-G, IL2RG, LDLR, PDGFRA, PIP5K1B, RAB11FIP2, SNX2, TFRC]	[CXCR4, EHD3, HSPA1A, PIP5K1C, WIPF3]	[ARAP3, CAV1, CXCR4, DAB2, HSPA2, PDGFRA, TFRC]	56.3336	25.6062	35.8487	[ARAP3, CAV1, CXCR4, DAB2, EHD3, HLA-A, HLA-G, HSPA1A, HSPA2, IL2RG, LDLR, PDGFRA, PIP5K1B, PIP5K1C, RAB11FIP2, SNX2, TFRC, WIPF3]
KEGG:04150	mTOR signaling pathway	KEGG_03.10.2018	0.0549077	0.161429	nan	nan	[-1]	None	5.29801	8	Specific for Cluster #2	[WNT2]	[ATP6V1C1, ATP6V1E1, LAMTOR3, PRKCB, PRKCG, WNT7B]	[WNT10B]	12.5	75	12.5	[ATP6V1C1, ATP6V1E1, LAMTOR3, PRKCB, PRKCG, WNT10B, WNT2, WNT7B]
KEGG:04210	Apoptosis	KEGG_03.10.2018	0.773711	0.874888	nan	nan	[-1]	None	8.82353	12	None Specific Cluster	[BID, CTSH, FAS, FOS, GADD45A, GZMB, JUN, RIPK1]	[FOS, TNFSF10]	[CTSH, CTSL, CTSS, FAS, PMAIP1, TNFSF10]	59.7494	14.9373	44.812	[BID, CTSH, CTSL, CTSS, FAS, FOS, GADD45A, GZMB, JUN, PMAIP1, RIPK1, TNFSF10]
KEGG:04217	Necroptosis	KEGG_03.10.2018	0.692203	0.827266	nan	nan	[-1]	None	11.1111	18	None Specific Cluster	[BID, FAS, IRF9, PYGM, RIPK1, SLC25A4, STAT1, STAT2, TNFAIP3]	[IL1A, IL33, TNFSF10]	[CAMK2D, CYBB, FAS, HIST1H2AE, HIST1H2AI, HIST1H2AM, TLR3, TNFSF10]	48.2415	16.0805	42.8813	[BID, CAMK2D, CYBB, FAS, HIST1H2AE, HIST1H2AI, HIST1H2AM, IL1A, IL33, IRF9, PYGM, RIPK1, SLC25A4, STAT1, STAT2, TLR3, TNFAIP3, TNFSF10]
KEGG:04218	Cellular senescence	KEGG_03.10.2018	0.352496	0.563227	nan	nan	[-1]	None	7.5	12	None Specific Cluster	[CCNA2, CCNB2, CXCL8, GADD45A, HLA-A, HLA-G, SLC25A4]	[CDK1, IL1A, ZFP36L1, ZFP36L2]	[CDK1, CXCL8, RRAS]	54.926	31.3863	23.5397	[CCNA2, CCNB2, CDK1, CXCL8, GADD45A, HLA-A, HLA-G, IL1A, RRAS, SLC25A4, ZFP36L1, ZFP36L2]
KEGG:04260	Cardiac muscle contraction	KEGG_03.10.2018	1	1	nan	nan	[-1]	None	8.97436	7	Specific for Cluster #2	[CACNG3, COX7B]	[ATP1A3, CACNB3, CACNB4, CACNG3, COX7B]	[CACNG4, COX6C]	25.3035	63.2587	25.3035	[ATP1A3, CACNB3, CACNB4, CACNG3, CACNG4, COX6C, COX7B]
KEGG:04261	Adrenergic signaling in cardiomyocytes	KEGG_03.10.2018	1	1	nan	nan	[-1]	None	9.72222	14	None Specific Cluster	[ADRA1B, CACNG3, PLCB4]	[ATP1A3, ATP2B2, ATP2B3, CACNB3, CACNB4, CACNG3, PLCB1]	[CACNG4, CAMK2D, PLN, PPP1R1A, SCN4B]	20.8826	48.7262	34.8044	[ADRA1B, ATP1A3, ATP2B2, ATP2B3, CACNB3, CACNB4, CACNG3, CACNG4, CAMK2D, PLCB1, PLCB4, PLN, PPP1R1A, SCN4B]
KEGG:04350	TGF-beta signaling pathway	KEGG_03.10.2018	0.854939	0.930934	nan	nan	[-1]	None	10.7143	9	None Specific Cluster	[ACVR1C, BAMBI, BMP5, BMP6, INHBA, THBS1]	[BMP6, DCN, ID3, INHBA, THBS1]	[ID3, INHBA, TGIF1]	55.5053	46.2544	27.7526	[ACVR1C, BAMBI, BMP5, BMP6, DCN, ID3, INHBA, TGIF1, THBS1]
KEGG:04360	Axon guidance	KEGG_03.10.2018	0.255657	0.458311	nan	nan	[-1]	None	12.5714	22	Specific for Cluster #2	[EFNA3, EFNB3, LIMK2, MET, PLXNA4, SEMA3A, SEMA3D, SEMA3E]	[CDK5, CXCR4, EFNB3, EPHA4, EPHA6, EPHB6, LIMK2, MET, NTNG1, PLXNA4, RND1, SEMA3C, SEMA3D, SEMA4A, SLIT3]	[CAMK2D, CXCR4, DCC, EFNB3, MET, PLXNB1, RND1, RRAS, SEMA3A]	32.4322	60.8104	36.4863	[CAMK2D, CDK5, CXCR4, DCC, EFNA3, EFNB3, EPHA4, EPHA6, EPHB6, LIMK2, MET, NTNG1, PLXNA4, PLXNB1, RND1, RRAS, SEMA3A, SEMA3C, SEMA3D, SEMA3E, SEMA4A, SLIT3]
KEGG:04370	VEGF signaling pathway	KEGG_03.10.2018	0.830004	0.931379	nan	nan	[-1]	None	8.47458	5	Specific for Cluster #2	[KDR, PTGS2, VEGFA]	[KDR, PRKCB, PRKCG, PTGS2, VEGFA]	[PTGS2, VEGFA]	41.9382	69.897	27.9588	[KDR, PRKCB, PRKCG, PTGS2, VEGFA]
KEGG:04371	Apelin signaling pathway	KEGG_03.10.2018	0.318483	0.532012	nan	nan	[-1]	None	7.29927	10	None Specific Cluster	[APLNR, CTGF, EGR1, PLCB4, RYR1]	[APLNR, PLCB1, SPP1]	[APLNR, GNG2, NOS2, RRAS, SPP1]	44.8856	26.9314	44.8856	[APLNR, CTGF, EGR1, GNG2, NOS2, PLCB1, PLCB4, RRAS, RYR1, SPP1]
KEGG:04380	Osteoclast differentiation	KEGG_03.10.2018	0.138774	0.299996	nan	nan	[-1]	None	14.0625	18	None Specific Cluster	[FCGR2A, FOS, IRF9, JUN, STAT1, STAT2]	[FCGR2B, FOS, IL1A, IL1R1, ITGB3, JUNB, JUND, SIRPB1, SOCS3]	[CSF1, FCGR2A, FCGR2B, IL1R1, ITGB3, JUNB, LILRA1, LILRA2, SIRPB1, TNFRSF11B]	29.9315	44.8972	49.8858	[CSF1, FCGR2A, FCGR2B, FOS, IL1A, IL1R1, IRF9, ITGB3, JUN, JUNB, JUND, LILRA1, LILRA2, SIRPB1, SOCS3, STAT1, STAT2, TNFRSF11B]
KEGG:04390	Hippo signaling pathway	KEGG_03.10.2018	0.0795511	0.212618	nan	nan	[-1]	None	5.84416	9	None Specific Cluster	[AREG, BMP5, BMP6, CTGF, WNT2]	[BMP6, WNT7B]	[FGF1, SNAI2, WNT10B]	53.0135	21.2054	31.8081	[AREG, BMP5, BMP6, CTGF, FGF1, SNAI2, WNT10B, WNT2, WNT7B]
KEGG:04530	Tight junction	KEGG_03.10.2018	0.0384924	0.13159	nan	nan	[-1]	None	5.29412	9	None Specific Cluster	[CLDN11, JUN, MYL12A, TJP2]	[TJP2, YBX3]	[CLDN24, MSN, MYH11, MYH8, MYL12A, TJP2]	39.299	19.6495	58.9485	[CLDN11, CLDN24, JUN, MSN, MYH11, MYH8, MYL12A, TJP2, YBX3]
KEGG:04610	Complement and coagulation cascades	KEGG_03.10.2018	0.00708645	0.035921	nan	nan	[-1]	None	20.2532	16	Specific for Cluster #3	[C1S, C3, F13A1, F3]	[C6, C7, CFH, CR1, F13A1, F5, MASP1, SERPIND1]	[A2M, C1S, C3, C7, CFH, CFI, CR1, F13A1, F2R, SERPINA5, SERPIND1, VWF]	21.8104	43.6209	65.4313	[A2M, C1S, C3, C6, C7, CFH, CFI, CR1, F13A1, F2R, F3, F5, MASP1, SERPINA5, SERPIND1, VWF]
KEGG:04611	Platelet activation	KEGG_03.10.2018	1	1	nan	nan	[-1]	None	9.7561	12	None Specific Cluster	[APBB1IP, FCGR2A, MYL12A, P2RY12, PLCB4, PRKG2, RASGRP1]	[ITGB3, PLCB1]	[F2R, FCGR2A, ITGA2, ITGB3, MYL12A, P2RY12, VWF]	52.2807	14.9373	52.2807	[APBB1IP, F2R, FCGR2A, ITGA2, ITGB3, MYL12A, P2RY12, PLCB1, PLCB4, PRKG2, RASGRP1, VWF]
KEGG:04620	Toll-like receptor signaling pathway	KEGG_03.10.2018	0.0984742	0.241262	nan	nan	[-1]	None	15.3846	16	None Specific Cluster	[CCL5, CXCL10, CXCL11, CXCL8, CXCL9, FOS, JUN, RIPK1, STAT1, TLR7]	[CXCL11, CXCL9, FOS, LY96, SPP1, TLR5, TLR8]	[CCL5, CXCL10, CXCL11, CXCL8, CXCL9, SPP1, TLR2, TLR3, TLR5, TLR7]	52.5775	36.8042	52.5775	[CCL5, CXCL10, CXCL11, CXCL8, CXCL9, FOS, JUN, LY96, RIPK1, SPP1, STAT1, TLR2, TLR3, TLR5, TLR7, TLR8]
KEGG:04621	NOD-like receptor signaling pathway	KEGG_03.10.2018	0.000392162	0.00339105	nan	nan	[-1]	None	19.0476	32	Specific for Cluster #1	[AIM2, BRCC3, CARD17, CASP4, CCL2, CCL5, CXCL8, GBP2, GBP4, GBP5, IFI16, IRF9, JUN, NAMPT, OAS1, OAS2, OAS3, P2RX7, PLCB4, RIPK1, STAT1, STAT2, TNFAIP3]	[CCL2, CXCL2, GBP2, GBP3, IFI16, IL18, PLCB1, PRKCD, PYDC1, TXNIP]	[CCL2, CCL5, CXCL8, CYBB, GBP2, GBP3, GBP4, GBP5, IFI16, IL18, NAIP, PRKCD, TXNIP]	65.0622	28.2879	36.7743	[AIM2, BRCC3, CARD17, CASP4, CCL2, CCL5, CXCL2, CXCL8, CYBB, GBP2, GBP3, GBP4, GBP5, IFI16, IL18, IRF9, JUN, NAIP, NAMPT, OAS1, OAS2, OAS3, P2RX7, PLCB1, PLCB4, PRKCD, PYDC1, RIPK1, STAT1, STAT2, TNFAIP3, TXNIP]
KEGG:04622	RIG-I-like receptor signaling pathway	KEGG_03.10.2018	1	1	nan	nan	[-1]	None	10	7	Specific for Cluster #1	[CXCL10, CXCL8, DDX58, DHX58, IFIH1, RIPK1]	[PIN1]	[CXCL10, CXCL8]	75.9104	12.6517	25.3035	[CXCL10, CXCL8, DDX58, DHX58, IFIH1, PIN1, RIPK1]
KEGG:04623	Cytosolic DNA-sensing pathway	KEGG_03.10.2018	0.678785	0.824639	nan	nan	[-1]	None	11.1111	7	Specific for Cluster #1	[AIM2, CCL5, CXCL10, DDX58, RIPK1]	[IL18, IL33]	[CCL5, CXCL10, IL18]	60.3641	24.1457	36.2185	[AIM2, CCL5, CXCL10, DDX58, IL18, IL33, RIPK1]
KEGG:04625	C-type lectin receptor signaling pathway	KEGG_03.10.2018	0.869512	0.93298	nan	nan	[-1]	None	10.5769	11	Specific for Cluster #1	[EGR2, EGR3, IRF1, IRF9, JUN, PTGS2, STAT1, STAT2]	[EGR3, PRKCD, PTGS2]	[CLEC4E, EGR2, EGR3, PRKCD, PTGS2, RRAS]	61.5529	23.0823	46.1646	[CLEC4E, EGR2, EGR3, IRF1, IRF9, JUN, PRKCD, PTGS2, RRAS, STAT1, STAT2]
KEGG:04630	JAK-STAT signaling pathway	KEGG_03.10.2018	0.600507	0.748089	nan	nan	[-1]	None	8.64198	14	Specific for Cluster #1	[GFAP, GH1, IL13RA1, IL13RA2, IL2RG, IRF9, OSMR, PDGFRA, STAT1, STAT2]	[GHR, IL12RB2, OSMR, SOCS3]	[GFAP, IL12RB2, IL13RA1, IL13RA2, PDGFRA, PRLR]	62.9242	25.1697	37.7545	[GFAP, GH1, GHR, IL12RB2, IL13RA1, IL13RA2, IL2RG, IRF9, OSMR, PDGFRA, PRLR, SOCS3, STAT1, STAT2]
KEGG:04650	Natural killer cell mediated cytotoxicity	KEGG_03.10.2018	0.560087	0.722217	nan	nan	[-1]	None	11.4504	15	None Specific Cluster	[BID, FAS, GZMB, HLA-A, HLA-G, ICAM1, KLRC1, KLRC3, KLRC4-KLRK1]	[KLRC3, KLRC4-KLRK1, PRKCB, PRKCG, TNFSF10, VAV3]	[FAS, ICAM1, ICAM2, KLRC3, KLRC4-KLRK1, RAET1L, TNFSF10]	52.5658	35.0438	40.8845	[BID, FAS, GZMB, HLA-A, HLA-G, ICAM1, ICAM2, KLRC1, KLRC3, KLRC4-KLRK1, PRKCB, PRKCG, RAET1L, TNFSF10, VAV3]
KEGG:04657	IL-17 signaling pathway	KEGG_03.10.2018	0.118149	0.275681	nan	nan	[-1]	None	15.0538	14	None Specific Cluster	[CCL2, CCL20, CXCL10, CXCL8, FOS, JUN, MMP3, PTGS2, TNFAIP3]	[CCL2, CXCL2, FOS, IL17RB, JUND, MAPK4, MMP3, PTGS2, S100A8]	[CCL2, CXCL10, CXCL8, MMP3, PTGS2, S100A8]	53.3829	53.3829	35.5886	[CCL2, CCL20, CXCL10, CXCL2, CXCL8, FOS, IL17RB, JUN, JUND, MAPK4, MMP3, PTGS2, S100A8, TNFAIP3]
KEGG:04666	Fc gamma R-mediated phagocytosis	KEGG_03.10.2018	0.485189	0.660396	nan	nan	[-1]	None	12.0879	11	Specific for Cluster #2	[FCGR2A, LIMK2, PIP5K1B, PTPRC, SCIN]	[FCGR2B, LIMK2, PIP5K1C, PRKCB, PRKCD, PRKCG, SCIN, VAV3]	[FCGR2A, FCGR2B, PRKCD, SCIN]	38.4705	61.5529	30.7764	[FCGR2A, FCGR2B, LIMK2, PIP5K1B, PIP5K1C, PRKCB, PRKCD, PRKCG, PTPRC, SCIN, VAV3]
KEGG:04668	TNF signaling pathway	KEGG_03.10.2018	0.00368126	0.0216458	nan	nan	[-1]	None	19.0909	21	Specific for Cluster #1	[CCL2, CCL20, CCL5, CXCL10, FAS, FOS, ICAM1, IRF1, JUN, MMP3, PTGS2, RIPK1, SELE, TNFAIP3, VCAM1]	[CCL2, CX3CL1, CXCL2, EDN1, FOS, JUNB, MMP3, PTGS2, SOCS3, VCAM1]	[CCL2, CCL5, CSF1, CXCL10, FAS, ICAM1, JUNB, MMP3, PTGS2, SELE]	61.1659	40.7772	40.7772	[CCL2, CCL20, CCL5, CSF1, CX3CL1, CXCL10, CXCL2, EDN1, FAS, FOS, ICAM1, IRF1, JUN, JUNB, MMP3, PTGS2, RIPK1, SELE, SOCS3, TNFAIP3, VCAM1]
KEGG:04670	Leukocyte transendothelial migration	KEGG_03.10.2018	1	1	nan	nan	[-1]	None	9.82143	11	None Specific Cluster	[CLDN11, ICAM1, MYL12A, VCAM1]	[CXCR4, PRKCB, PRKCG, VAV3, VCAM1]	[CLDN24, CXCR4, CYBB, ICAM1, MSN, MYL12A]	32.1989	40.2486	48.2983	[CLDN11, CLDN24, CXCR4, CYBB, ICAM1, MSN, MYL12A, PRKCB, PRKCG, VAV3, VCAM1]
KEGG:04721	Synaptic vesicle cycle	KEGG_03.10.2018	0.138503	0.303879	nan	nan	[-1]	None	15.873	10	Specific for Cluster #2	[SLC17A7]	[ATP6V0D1, ATP6V1C1, ATP6V1E1, CPLX1, NAPA, SLC17A6, SNAP25, UNC13C]	[ATP6V0D2, SLC17A6, SLC17A7]	9.26628	74.1303	27.7989	[ATP6V0D1, ATP6V0D2, ATP6V1C1, ATP6V1E1, CPLX1, NAPA, SLC17A6, SLC17A7, SNAP25, UNC13C]
KEGG:04740	Olfactory transduction	KEGG_03.10.2018	0.0906981	0.229873	nan	nan	[-1]	None	12.5	56	Specific for Cluster #1	[OR13C2, OR13D1, OR14I1, OR1C1, OR1E2, OR1J2, OR1J4, OR1L1, OR1L3, OR1Q1, OR1S1, OR2A25, OR2AK2, OR2J3, OR2L13, OR2L2, OR2L8, OR2M2, OR2M3, OR2M5, OR4C12, OR4K15, OR4K2, OR4P4, OR51A7, OR52N4, OR5D14, OR5V1, OR6C3, OR7A10, OR8A1, OR8G1, OR8H1, OR8H3, OR8I2, PDE2A, PRKG2]	[GNAL, NCALD, OR14I1, OR1L1, OR2AK2, OR2L8, OR2T6, OR4K2, OR4S2, OR51A4, OR52K1, OR56B1, OR5V1, OR6C3, OR6N1, OR7A5, PDE2A, RGS2]	[CAMK2D, OR13C4, OR14I1, OR1D5, OR2T6, OR4C6, OR4K5, OR51A4, OR52E2, OR5AK2, OR5T2, OR5V1, OR7A5, OR8K1, PDE2A]	62.6012	30.4546	25.3788	[CAMK2D, GNAL, NCALD, OR13C2, OR13C4, OR13D1, OR14I1, OR1C1, OR1D5, OR1E2, OR1J2, OR1J4, OR1L1, OR1L3, OR1Q1, OR1S1, OR2A25, OR2AK2, OR2J3, OR2L13, OR2L2, OR2L8, OR2M2, OR2M3, OR2M5, OR2T6, OR4C12, OR4C6, OR4K15, OR4K2, OR4K5, OR4P4, OR4S2, OR51A4, OR51A7, OR52E2, OR52K1, OR52N4, OR56B1, OR5AK2, OR5D14, OR5T2, OR5V1, OR6C3, OR6N1, OR7A10, OR7A5, OR8A1, OR8G1, OR8H1, OR8H3, OR8I2, OR8K1, PDE2A, PR…
KEGG:04742	Taste transduction	KEGG_03.10.2018	5.43145e-05	0.0013307	nan	nan	[-1]	None	25.3012	21	Specific for Cluster #2	[GABRA5, TAS2R19, TAS2R31, TAS2R43, TAS2R8]	[GABBR2, GABRA1, GABRA2, GABRA3, GABRA5, HTR1A, HTR1D, HTR3B, TAS2R19, TAS2R20, TAS2R31, TAS2R4, TAS2R43, TAS2R5, TAS2R50]	[GABRA2, GABRA5, HTR1F, P2RX2, SCN9A, TAS2R16, TAS2R43, TAS2R46, TAS2R50]	21.5273	64.5818	38.7491	[GABBR2, GABRA1, GABRA2, GABRA3, GABRA5, HTR1A, HTR1D, HTR1F, HTR3B, P2RX2, SCN9A, TAS2R16, TAS2R19, TAS2R20, TAS2R31, TAS2R4, TAS2R43, TAS2R46, TAS2R5, TAS2R50, TAS2R8]
KEGG:04810	Regulation of actin cytoskeleton	KEGG_03.10.2018	0.908243	0.92077	nan	nan	[-1]	None	10.3286	22	None Specific Cluster	[ITGA5, ITGB4, LIMK2, MYL12A, PDGFRA, PIP5K1B, SCIN]	[CXCR4, DIAPH2, FGF5, FGF9, FN1, ITGB3, LIMK2, PDGFD, PIP5K1C, SCIN, VAV3]	[CXCR4, DIAPH2, F2R, FGF1, ITGA2, ITGB3, ITGB4, LPAR4, MSN, MYL12A, PDGFRA, RRAS, SCIN]	28.6406	45.0066	53.1896	[CXCR4, DIAPH2, F2R, FGF1, FGF5, FGF9, FN1, ITGA2, ITGA5, ITGB3, ITGB4, LIMK2, LPAR4, MSN, MYL12A, PDGFD, PDGFRA, PIP5K1B, PIP5K1C, RRAS, SCIN, VAV3]
KEGG:04913	Ovarian steroidogenesis	KEGG_03.10.2018	0.151198	0.317515	nan	nan	[-1]	None	16.3265	8	None Specific Cluster	[BMP6, CYP1B1, FSHB, FSHR, LDLR, PTGS2]	[AKR1C3, BMP6, CYP1B1, FSHR, PTGS2]	[CYP1A1, CYP1B1, FSHR, PTGS2]	57.5906	47.9921	38.3937	[AKR1C3, BMP6, CYP1A1, CYP1B1, FSHB, FSHR, LDLR, PTGS2]
KEGG:04915	Estrogen signaling pathway	KEGG_03.10.2018	0.198053	0.3781	nan	nan	[-1]	None	6.56934	9	Specific for Cluster #2	[FOS, JUN, PLCB4]	[FOS, GABBR2, HSPA1A, KCNJ6, PLCB1, PRKCD]	[HSPA2, PRKCD]	30.5438	61.0876	20.3625	[FOS, GABBR2, HSPA1A, HSPA2, JUN, KCNJ6, PLCB1, PLCB4, PRKCD]
KEGG:04919	Thyroid hormone signaling pathway	KEGG_03.10.2018	0.211785	0.399133	nan	nan	[-1]	None	13.7931	16	None Specific Cluster	[DIO2, MED27, PFKFB2, PLCB4, STAT1]	[ATP1A3, DIO2, ITGB3, PFKP, PLCB1, PLCD4, PRKCB, PRKCG]	[DIO2, ITGB3, PLCD4, PLCE1, PLN, SLC2A1, SLCO1C1]	28.9223	46.2756	40.4912	[ATP1A3, DIO2, ITGB3, MED27, PFKFB2, PFKP, PLCB1, PLCB4, PLCD4, PLCE1, PLN, PRKCB, PRKCG, SLC2A1, SLCO1C1, STAT1]
KEGG:04922	Glucagon signaling pathway	KEGG_03.10.2018	1	1	nan	nan	[-1]	None	9.70874	10	None Specific Cluster	[CPT1A, LDHA, PLCB4, PYGM]	[LDHA, PLCB1]	[CAMK2D, PCK1, PHKA1, SIK1, SLC2A1]	38.4101	19.2051	48.0126	[CAMK2D, CPT1A, LDHA, PCK1, PHKA1, PLCB1, PLCB4, PYGM, SIK1, SLC2A1]
KEGG:04924	Renin secretion	KEGG_03.10.2018	0.835564	0.923518	nan	nan	[-1]	None	10.7692	7	Specific for Cluster #1	[AGT, AQP1, EDNRA, PLCB4, PRKG2]	[ADCYAP1, AQP1, PLCB1]	[AGT, AQP1]	60.3641	36.2185	24.1457	[ADCYAP1, AGT, AQP1, EDNRA, PLCB1, PLCB4, PRKG2]
KEGG:04926	Relaxin signaling pathway	KEGG_03.10.2018	0.883356	0.927524	nan	nan	[-1]	None	9.23077	12	None Specific Cluster	[EDNRB, FOS, JUN, PLCB4, RXFP1, RXFP2, VEGFA]	[EDN1, FOS, PLCB1, RXFP2, VEGFA]	[GNG2, NOS2, RXFP2, VEGFA, VEGFD]	51.162	36.5443	36.5443	[EDN1, EDNRB, FOS, GNG2, JUN, NOS2, PLCB1, PLCB4, RXFP1, RXFP2, VEGFA, VEGFD]
KEGG:04933	AGE-RAGE signaling pathway in diabetic complications	KEGG_03.10.2018	0.000308951	0.00302772	nan	nan	[-1]	None	22.2222	22	None Specific Cluster	[CCL2, CXCL8, EGR1, F3, ICAM1, JUN, NOX4, PLCB4, SELE, STAT1, VCAM1, VEGFA]	[CCL2, EDN1, FN1, IL1A, PLCB1, PLCD4, PRKCB, PRKCD, VCAM1, VEGFA]	[CCL2, CXCL8, CYBB, ICAM1, PLCD4, PLCE1, PRKCD, SELE, VEGFA, VEGFD]	48.6483	40.5403	40.5403	[CCL2, CXCL8, CYBB, EDN1, EGR1, F3, FN1, ICAM1, IL1A, JUN, NOX4, PLCB1, PLCB4, PLCD4, PLCE1, PRKCB, PRKCD, SELE, STAT1, VCAM1, VEGFA, VEGFD]
KEGG:04976	Bile secretion	KEGG_03.10.2018	0.161283	0.320387	nan	nan	[-1]	None	15.493	11	None Specific Cluster	[ABCG2, AQP1, AQP9, LDLR, SLC4A4, SLC4A5]	[ABCG2, AQP1, ATP1A3]	[ABCG2, AQP1, AQP4, AQP9, CYP7A1, SLC2A1, SLCO1A2]	47.1741	23.587	55.0364	[ABCG2, AQP1, AQP4, AQP9, ATP1A3, CYP7A1, LDLR, SLC2A1, SLC4A4, SLC4A5, SLCO1A2]
KEGG:04978	Mineral absorption	KEGG_03.10.2018	0.000379386	0.00348561	nan	nan	[-1]	None	27.451	14	Specific for Cluster #1	[HMOX1, MT1A, MT1B, MT1E, MT1F, MT1G, MT1H, MT1HL1, MT1M, MT1X, MT2A, TF]	[ATP1A3, CYBRD1, MT1E, MT1F, MT1G, MT1H, MT1M, MT1X]	[CYBRD1, MT1E, MT1F, MT1G, MT1H, TF]	69.4285	46.2857	34.7143	[ATP1A3, CYBRD1, HMOX1, MT1A, MT1B, MT1E, MT1F, MT1G, MT1H, MT1HL1, MT1M, MT1X, MT2A, TF]
KEGG:04979	Cholesterol metabolism	KEGG_03.10.2018	0.09238	0.230167	nan	nan	[-1]	None	18	9	Specific for Cluster #3	[ANGPTL4, APOC1, LDLR, PLTP]	[ANGPTL4]	[ANGPTL4, APOC1, CD36, CYP7A1, LIPG, LRP2, NPC2]	39.299	9.82476	68.7733	[ANGPTL4, APOC1, CD36, CYP7A1, LDLR, LIPG, LRP2, NPC2, PLTP]
KEGG:05034	Alcoholism	KEGG_03.10.2018	0.102709	0.247511	nan	nan	[-1]	None	13.8889	25	None Specific Cluster	[BDNF, GRIN2B, HDAC8, HIST1H2BF, HIST1H3I, HIST1H4B, HIST1H4C, HIST1H4D, HIST2H2BE, PDYN]	[BDNF, GRIN2A, H3F3B, HIST1H2BK, HIST1H2BM, HIST1H3B, HIST1H3F, HIST1H4B, HIST1H4C, HIST1H4D, NPY, PDYN]	[BDNF, GNG2, GRIN2B, H3F3B, HIST1H2AE, HIST1H2AI, HIST1H2AM, HIST1H2BA, HIST1H2BF, HIST1H2BG, HIST1H3E, HIST2H2BE, MAOB, PDYN]	35.9298	43.1157	50.3017	[BDNF, GNG2, GRIN2A, GRIN2B, H3F3B, HDAC8, HIST1H2AE, HIST1H2AI, HIST1H2AM, HIST1H2BA, HIST1H2BF, HIST1H2BG, HIST1H2BK, HIST1H2BM, HIST1H3B, HIST1H3E, HIST1H3F, HIST1H3I, HIST1H4B, HIST1H4C, HIST1H4D, HIST2H2BE, MAOB, NPY, PDYN]
KEGG:05132	Salmonella infection	KEGG_03.10.2018	1	1	nan	nan	[-1]	None	9.30233	8	None Specific Cluster	[CXCL8, FOS, JUN]	[CXCL2, FOS, IL18, IL1A, TLR5]	[CXCL8, IL18, NOS2, TLR5]	31.3811	52.3018	41.8414	[CXCL2, CXCL8, FOS, IL18, IL1A, JUN, NOS2, TLR5]
KEGG:05133	Pertussis	KEGG_03.10.2018	0.246947	0.448163	nan	nan	[-1]	None	14.4737	11	None Specific Cluster	[C1S, C3, CXCL8, FOS, IRF1, ITGA5, JUN]	[FOS, IL1A, LY96]	[C1S, C3, CXCL8, IRF8, NOS2]	56.348	24.1492	40.2486	[C1S, C3, CXCL8, FOS, IL1A, IRF1, IRF8, ITGA5, JUN, LY96, NOS2]
KEGG:05134	Legionellosis	KEGG_03.10.2018	0.0227141	0.0927492	nan	nan	[-1]	None	20	11	Specific for Cluster #3	[C3, CXCL8]	[CLK1, CR1, CXCL2, HSPA1A, IL18, TLR5]	[C3, CR1, CXCL8, HSPA2, IL18, NAIP, TLR2, TLR5]	15.7247	47.1741	62.8988	[C3, CLK1, CR1, CXCL2, CXCL8, HSPA1A, HSPA2, IL18, NAIP, TLR2, TLR5]
KEGG:05142	Chagas disease (American trypanosomiasis)	KEGG_03.10.2018	0.405957	0.602784	nan	nan	[-1]	None	12.7451	13	None Specific Cluster	[C3, CCL2, CCL5, CXCL8, FAS, FOS, GNA14, JUN, PLCB4]	[CCL2, FOS, GNAL, PLCB1]	[C3, CCL2, CCL5, CXCL8, FAS, NOS2, TLR2]	59.2755	26.3447	46.1031	[C3, CCL2, CCL5, CXCL8, FAS, FOS, GNA14, GNAL, JUN, NOS2, PLCB1, PLCB4, TLR2]
KEGG:05143	African trypanosomiasis	KEGG_03.10.2018	9.70919e-05	0.00142725	nan	nan	[-1]	None	34.2857	12	None Specific Cluster	[FAS, HBB, ICAM1, PLCB4, SELE, VCAM1]	[HBB, HPR, IL18, LAMA4, PLCB1, PRKCB, PRKCG, VCAM1]	[FAS, HBB, HPR, ICAM1, IL18, SELE]	41.4741	55.2988	41.4741	[FAS, HBB, HPR, ICAM1, IL18, LAMA4, PLCB1, PLCB4, PRKCB, PRKCG, SELE, VCAM1]
KEGG:05144	Malaria	KEGG_03.10.2018	0.000240075	0.00252079	nan	nan	[-1]	None	28.5714	14	Specific for Cluster #3	[ACKR1, CCL2, CXCL8, HBB, ICAM1, KLRC4-KLRK1, MET, SELE, THBS1, VCAM1]	[ACKR1, CCL2, CR1, HBB, IL18, KLRC4-KLRK1, MET, THBS1, VCAM1]	[ACKR1, CCL2, CD36, CR1, CXCL8, HBB, ICAM1, IL18, KLRC4-KLRK1, MET, SELE, TLR2]	54.8937	49.4043	65.8724	[ACKR1, CCL2, CD36, CR1, CXCL8, HBB, ICAM1, IL18, KLRC4-KLRK1, MET, SELE, THBS1, TLR2, VCAM1]
KEGG:05146	Amoebiasis	KEGG_03.10.2018	0.169501	0.32785	nan	nan	[-1]	None	14.5833	14	None Specific Cluster	[CXCL8, GNA14, PLCB4, SERPINB3]	[FN1, GNAL, IL1R1, IL1R2, LAMA4, PLCB1, PRKCB, PRKCG]	[CXCL8, IL1R1, NOS2, TLR2]	27.1954	54.3908	27.1954	[CXCL8, FN1, GNA14, GNAL, IL1R1, IL1R2, LAMA4, NOS2, PLCB1, PLCB4, PRKCB, PRKCG, SERPINB3, TLR2]
KEGG:05160	Hepatitis C	KEGG_03.10.2018	0.382741	0.586073	nan	nan	[-1]	None	12.2137	16	Specific for Cluster #1	[CLDN11, CXCL8, DDX58, IFIT1, IRF1, IRF9, LDLR, OAS1, OAS2, OAS3, RIPK1, STAT1, STAT2]	[SOCS3]	[CLDN24, CXCL8, TLR3]	79.5114	6.11626	18.3488	[CLDN11, CLDN24, CXCL8, DDX58, IFIT1, IRF1, IRF9, LDLR, OAS1, OAS2, OAS3, RIPK1, SOCS3, STAT1, STAT2, TLR3]
KEGG:05161	Hepatitis B	KEGG_03.10.2018	0.888895	0.926721	nan	nan	[-1]	None	10.4167	15	Specific for Cluster #1	[CCNA2, CXCL8, DDX58, EGR2, EGR3, FAS, FOS, IFIH1, JUN, STAT1, STAT2]	[EGR3, FOS, PRKCB, PRKCG]	[CXCL8, EGR2, EGR3, FAS, TLR2, TLR3]	65.2287	23.7195	35.5793	[CCNA2, CXCL8, DDX58, EGR2, EGR3, FAS, FOS, IFIH1, JUN, PRKCB, PRKCG, STAT1, STAT2, TLR2, TLR3]
KEGG:05163	Human cytomegalovirus infection	KEGG_03.10.2018	0.910897	0.917136	nan	nan	[-1]	None	10.2222	23	None Specific Cluster	[B2M, BID, CCL2, CCL5, CXCL8, FAS, HLA-A, HLA-G, PDGFRA, PLCB4, PTGS2, RIPK1, TAP2, VEGFA]	[CCL2, CX3CL1, CXCR4, IL1R1, ITGB3, PLCB1, PRKCB, PRKCG, PTGS2, VEGFA]	[B2M, CCL2, CCL5, CXCL8, CXCR4, FAS, GNG2, IL1R1, ITGB3, PDGFRA, PTGER3, PTGS2, VEGFA]	52.8553	37.7538	49.0799	[B2M, BID, CCL2, CCL5, CX3CL1, CXCL8, CXCR4, FAS, GNG2, HLA-A, HLA-G, IL1R1, ITGB3, PDGFRA, PLCB1, PLCB4, PRKCB, PRKCG, PTGER3, PTGS2, RIPK1, TAP2, VEGFA]
KEGG:05165	Human papillomavirus infection	KEGG_03.10.2018	1	1	nan	nan	[-1]	None	10.0295	34	None Specific Cluster	[CCNA2, FAS, HDAC8, HLA-A, HLA-G, IRF1, IRF9, ITGA5, ITGB4, MX1, PTGS2, STAT1, STAT2, THBS1, TNC, VEGFA, WNT2]	[ATP6V0D1, ATP6V1C1, ATP6V1E1, FN1, IBSP, ITGB3, LAMA4, PTGS2, RELN, SPP1, THBS1, TNC, VEGFA, WNT7B]	[ATP6V0D2, FAS, ITGA2, ITGB3, ITGB4, LFNG, PTGS2, SPP1, TLR3, TNC, TNR, VEGFA, VWF, WNT10B]	46.3183	38.1445	38.1445	[ATP6V0D1, ATP6V0D2, ATP6V1C1, ATP6V1E1, CCNA2, FAS, FN1, HDAC8, HLA-A, HLA-G, IBSP, IRF1, IRF9, ITGA2, ITGA5, ITGB3, ITGB4, LAMA4, LFNG, MX1, PTGS2, RELN, SPP1, STAT1, STAT2, THBS1, TLR3, TNC, TNR, VEGFA, VWF, WNT10B, WNT2, WNT7B]
KEGG:05167	Kaposi sarcoma-associated herpesvirus infection	KEGG_03.10.2018	0.713051	0.831893	nan	nan	[-1]	None	10.7527	20	Specific for Cluster #1	[ANGPT2, BID, C3, CXCL8, FAS, FOS, HLA-A, HLA-G, ICAM1, IRF9, JUN, PTGS2, STAT1, STAT2, VEGFA, ZFP36]	[CXCL2, FOS, PTGS2, VEGFA, ZFP36]	[ANGPT2, C3, CLEC2B, CXCL8, FAS, GNG2, ICAM1, PTGS2, TLR3, VEGFA]	69.7902	21.8094	43.6189	[ANGPT2, BID, C3, CLEC2B, CXCL2, CXCL8, FAS, FOS, GNG2, HLA-A, HLA-G, ICAM1, IRF9, JUN, PTGS2, STAT1, STAT2, TLR3, VEGFA, ZFP36]
KEGG:05169	Epstein-Barr virus infection	KEGG_03.10.2018	0.905572	0.924438	nan	nan	[-1]	None	9.45274	19	None Specific Cluster	[CCNA2, CD38, CD44, DDX58, HLA-A, HLA-DPA1, HLA-DQA1, HLA-DRA, HLA-G, ICAM1, JUN, RIPK1, TNFAIP3]	[CD38, CD44, CDK1, HLA-DPA1, HLA-DPB1, HLA-DQA1, HLA-DRA, HSPA1A, PSMD8, SEM1]	[CD38, CD44, CDK1, HLA-DPA1, HLA-DPB1, HLA-DQA1, HLA-DRA, HSPA2, ICAM1, SEM1]	57.618	44.3215	44.3215	[CCNA2, CD38, CD44, CDK1, DDX58, HLA-A, HLA-DPA1, HLA-DPB1, HLA-DQA1, HLA-DRA, HLA-G, HSPA1A, HSPA2, ICAM1, JUN, PSMD8, RIPK1, SEM1, TNFAIP3]
KEGG:05170	Human immunodeficiency virus 1 infection	KEGG_03.10.2018	0.645435	0.790658	nan	nan	[-1]	None	8.96226	19	None Specific Cluster	[AP1S1, B2M, BID, CCNB2, FAS, FOS, HLA-A, HLA-G, JUN, LIMK2, RIPK1, TAP2]	[AP1S1, CDK1, CXCR4, ELOB, FOS, LIMK2, PRKCB, PRKCG]	[AP1S1, B2M, CDK1, CXCR4, FAS, GNG2, TLR2]	56.4241	37.6161	32.914	[AP1S1, B2M, BID, CCNB2, CDK1, CXCR4, ELOB, FAS, FOS, GNG2, HLA-A, HLA-G, JUN, LIMK2, PRKCB, PRKCG, RIPK1, TAP2, TLR2]
KEGG:05200	Pathways in cancer	KEGG_03.10.2018	0.881428	0.932157	nan	nan	[-1]	None	10.2662	54	None Specific Cluster	[BID, CKS2, CXCL8, EDNRA, EDNRB, FAS, FOS, GADD45A, GSTM1, GSTM5, GSTT1, HMOX1, IL13RA1, IL2RG, JUN, MET, PDGFRA, PLCB4, PTCH2, PTGS2, RASGRP1, STAT1, STAT2, TERC, VEGFA, WNT2]	[CXCR4, ELOB, FGF5, FGF9, FN1, FOS, GSTM1, GSTM5, GSTT1, IL12RB2, LAMA4, MET, PLCB1, PRKCB, PRKCG, PTGS2, RET, VEGFA, WNT7B]	[CAMK2D, CXCL8, CXCR4, DCC, F2R, FAS, FGF1, FRAT1, GNG2, GSTM1, GSTM5, GSTT1, IL12RB2, IL13RA1, ITGA2, LPAR3, LPAR4, MET, NOS2, PDGFRA, PMAIP1, PTGER3, PTGS2, RASGRP3, SLC2A1, VEGFA, VEGFD, WNT10B]	44.7649	32.7128	48.2084	[BID, CAMK2D, CKS2, CXCL8, CXCR4, DCC, EDNRA, EDNRB, ELOB, F2R, FAS, FGF1, FGF5, FGF9, FN1, FOS, FRAT1, GADD45A, GNG2, GSTM1, GSTM5, GSTT1, HMOX1, IL12RB2, IL13RA1, IL2RG, ITGA2, JUN, LAMA4, LPAR3, LPAR4, MET, NOS2, PDGFRA, PLCB1, PLCB4, PMAIP1, PRKCB, PRKCG, PTCH2, PTGER3, PTGS2, RASGRP1, RASGRP3, RET, SLC2A1, STAT1, STAT2, TERC, VEGFA, VEGFD, WNT10B, WNT2, WNT7B]
KEGG:05202	Transcriptional misregulation in cancer	KEGG_03.10.2018	0.902408	0.92765	nan	nan	[-1]	None	10.2151	19	Specific for Cluster #2	[CXCL8, DUSP6, ETV6, GADD45A, GZMB, HIST1H3I, MET, MMP3, NUPR1, PROM1]	[BCL6, DUSP6, ETV5, H3F3B, HIST1H3B, HIST1H3F, IL1R2, MET, MMP3, NR4A3, NUPR1, PROM1, TSPAN7]	[CXCL8, H3F3B, HIST1H3E, MET, MMP3]	46.5069	60.459	23.2534	[BCL6, CXCL8, DUSP6, ETV5, ETV6, GADD45A, GZMB, H3F3B, HIST1H3B, HIST1H3E, HIST1H3F, HIST1H3I, IL1R2, MET, MMP3, NR4A3, NUPR1, PROM1, TSPAN7]
KEGG:05203	Viral carcinogenesis	KEGG_03.10.2018	0.479339	0.658531	nan	nan	[-1]	None	11.4428	23	None Specific Cluster	[C3, CCNA2, EGR2, EGR3, HDAC8, HIST1H2BF, HIST1H4B, HIST1H4C, HIST1H4D, HIST2H2BE, HLA-A, HLA-G, IRF9, JUN, SCIN]	[ATP6V0D1, CDK1, EGR3, HIST1H2BK, HIST1H2BM, HIST1H4B, HIST1H4C, HIST1H4D, SCIN]	[ATP6V0D2, C3, CDK1, EGR2, EGR3, HIST1H2BA, HIST1H2BF, HIST1H2BG, HIST2H2BE, PMAIP1, SCIN]	57.5158	34.5095	42.1783	[ATP6V0D1, ATP6V0D2, C3, CCNA2, CDK1, EGR2, EGR3, HDAC8, HIST1H2BA, HIST1H2BF, HIST1H2BG, HIST1H2BK, HIST1H2BM, HIST1H4B, HIST1H4C, HIST1H4D, HIST2H2BE, HLA-A, HLA-G, IRF9, JUN, PMAIP1, SCIN]
KEGG:05205	Proteoglycans in cancer	KEGG_03.10.2018	0.122709	0.27751	nan	nan	[-1]	None	13.4328	27	None Specific Cluster	[CD44, FAS, ITGA5, KDR, MET, SDC4, THBS1, VEGFA, WNT2]	[CD44, DCN, FN1, ITGB3, KDR, LUM, MET, MIR21, PRKCB, PRKCG, THBS1, VEGFA, WNT7B]	[CAMK2D, CAV1, CD44, CTSL, FAS, HPSE2, ITGA2, ITGB3, MET, MSN, PLCE1, RRAS, TLR2, VEGFA, WNT10B]	30.4247	43.9468	50.7079	[CAMK2D, CAV1, CD44, CTSL, DCN, FAS, FN1, HPSE2, ITGA2, ITGA5, ITGB3, KDR, LUM, MET, MIR21, MSN, PLCE1, PRKCB, PRKCG, RRAS, SDC4, THBS1, TLR2, VEGFA, WNT10B, WNT2, WNT7B]
KEGG:05206	MicroRNAs in cancer	KEGG_03.10.2018	0.0400633	0.130874	nan	nan	[-1]	None	13.7124	41	None Specific Cluster	[CD44, CYP1B1, EFNA3, HMOX1, ITGA5, MET, MIR133A1, MIR141, MIR183, MIR29B2, MIR494, MIR9-1, MIRLET7A2, MIRLET7F1, PDGFRA, PTGS2, THBS1, TNC, VEGFA]	[CD44, CYP1B1, FSCN1, ITGB3, MET, MIR107, MIR183, MIR200C, MIR21, MIR221, MIR23A, MIR26B, MIR29B2, MIR30C1, MIR30E, MIR326, MIR331, MIR34A, MIRLET7I, PRKCB, PRKCG, PTGS2, THBS1, TNC, VEGFA]	[CD44, CYP1B1, ITGB3, MET, MIR101-2, MIR181A2, MIR29B1, MIR31, MIR34A, MIR494, MIR99A, MIRLET7F1, PDGFRA, PTGS2, TNC, TNR, VEGFA]	41.8627	55.0825	37.4561	[CD44, CYP1B1, EFNA3, FSCN1, HMOX1, ITGA5, ITGB3, MET, MIR101-2, MIR107, MIR133A1, MIR141, MIR181A2, MIR183, MIR200C, MIR21, MIR221, MIR23A, MIR26B, MIR29B1, MIR29B2, MIR30C1, MIR30E, MIR31, MIR326, MIR331, MIR34A, MIR494, MIR9-1, MIR99A, MIRLET7A2, MIRLET7F1, MIRLET7I, PDGFRA, PRKCB, PRKCG, PTGS2, THBS1, TNC, TNR, VEGFA]
KEGG:05225	Hepatocellular carcinoma	KEGG_03.10.2018	0.365421	0.577601	nan	nan	[-1]	None	7.7381	13	None Specific Cluster	[GADD45A, GSTM1, GSTM5, GSTT1, HMOX1, MET, TERC, WNT2]	[GSTM1, GSTM5, GSTT1, MET, PRKCB, PRKCG, WNT7B]	[FRAT1, GSTM1, GSTM5, GSTT1, MET, WNT10B]	51.8449	45.3643	38.8837	[FRAT1, GADD45A, GSTM1, GSTM5, GSTT1, HMOX1, MET, PRKCB, PRKCG, TERC, WNT10B, WNT2, WNT7B]
KEGG:05230	Central carbon metabolism in cancer	KEGG_03.10.2018	0.835564	0.923518	nan	nan	[-1]	None	10.7692	7	None Specific Cluster	[LDHA, MET, PDGFRA]	[LDHA, MET, PFKP, RET, TIGAR]	[MET, PDGFRA, SLC2A1]	34.7789	57.9648	34.7789	[LDHA, MET, PDGFRA, PFKP, RET, SLC2A1, TIGAR]
KEGG:05231	Choline metabolism in cancer	KEGG_03.10.2018	0.736301	0.845596	nan	nan	[-1]	None	11.1111	11	None Specific Cluster	[FOS, GPCPD1, JUN, PDGFRA, PIP5K1B, SLC22A2]	[FOS, GPCPD1, PDGFD, PIP5K1C, PRKCB, PRKCG, SLC22A2]	[PDGFRA, SLC44A2]	48.2983	56.348	16.0994	[FOS, GPCPD1, JUN, PDGFD, PDGFRA, PIP5K1B, PIP5K1C, PRKCB, PRKCG, SLC22A2, SLC44A2]
KEGG:05322	Systemic lupus erythematosus	KEGG_03.10.2018	6.93596e-06	0.000254897	nan	nan	[-1]	None	23.3083	31	None Specific Cluster	[C1S, C3, FCGR2A, GRIN2B, HIST1H2BF, HIST1H3I, HIST1H4B, HIST1H4C, HIST1H4D, HIST2H2BE, HLA-DMB, HLA-DPA1, HLA-DQA1, HLA-DRA]	[C6, C7, GRIN2A, H3F3B, HIST1H2BK, HIST1H2BM, HIST1H3B, HIST1H3F, HIST1H4B, HIST1H4C, HIST1H4D, HLA-DOB, HLA-DPA1, HLA-DPB1, HLA-DQA1, HLA-DRA]	[C1S, C3, C7, FCGR2A, GRIN2B, H3F3B, HIST1H2AE, HIST1H2AI, HIST1H2AM, HIST1H2BA, HIST1H2BF, HIST1H2BG, HIST1H3E, HIST2H2BE, HLA-DMA, HLA-DMB, HLA-DPA1, HLA-DPB1, HLA-DQA1, HLA-DRA]	39.6427	45.306	56.6325	[C1S, C3, C6, C7, FCGR2A, GRIN2A, GRIN2B, H3F3B, HIST1H2AE, HIST1H2AI, HIST1H2AM, HIST1H2BA, HIST1H2BF, HIST1H2BG, HIST1H2BK, HIST1H2BM, HIST1H3B, HIST1H3E, HIST1H3F, HIST1H3I, HIST1H4B, HIST1H4C, HIST1H4D, HIST2H2BE, HLA-DMA, HLA-DMB, HLA-DOB, HLA-DPA1, HLA-DPB1, HLA-DQA1, HLA-DRA]
KEGG:05418	Fluid shear stress and atherosclerosis	KEGG_03.10.2018	0.0631388	0.181988	nan	nan	[-1]	None	15.1079	21	None Specific Cluster	[CCL2, FOS, GSTM1, GSTM5, GSTT1, HMOX1, ICAM1, JUN, KDR, SDC4, SELE, VCAM1, VEGFA]	[ASS1, CCL2, EDN1, FOS, GSTM1, GSTM5, GSTT1, IL1A, IL1R1, IL1R2, ITGB3, KDR, VCAM1, VEGFA]	[CAV1, CCL2, CTSL, GSTM1, GSTM5, GSTT1, ICAM1, IL1R1, ITGB3, SELE, VEGFA]	51.812	55.7975	43.8409	[ASS1, CAV1, CCL2, CTSL, EDN1, FOS, GSTM1, GSTM5, GSTT1, HMOX1, ICAM1, IL1A, IL1R1, IL1R2, ITGB3, JUN, KDR, SDC4, SELE, VCAM1, VEGFA]
ds:H00255	Hypogonadotropic hypogonadism	KEGG-HUMAN-DISEASE_03.10.2018	0.00604171	0.031719	nan	nan	[-1]	None	30.4348	7	Specific for Cluster #2	[ANOS1, DUSP6, SEMA3A]	[DUSP6, FLRT3, NSMF, SPRY4, TACR3]	[SEMA3A]	37.9552	63.2587	12.6517	[ANOS1, DUSP6, FLRT3, NSMF, SEMA3A, SPRY4, TACR3]
ds:H00264	Charcot-Marie-Tooth disease; Hereditary motor and sensory neuropathy; Peroneal muscular atrophy	KEGG-HUMAN-DISEASE_03.10.2018	0.324869	0.536581	nan	nan	[-1]	None	14.8936	7	Specific for Cluster #1	[EGR2, FIG4, MPZ, PDK3, SURF1]	[HSPB8]	[EGR2, HSPB8, SH3TC2]	63.2587	12.6517	37.9552	[EGR2, FIG4, HSPB8, MPZ, PDK3, SH3TC2, SURF1]
ds:H00294	Dilated cardiomyopathy	KEGG-HUMAN-DISEASE_03.10.2018	0.159915	0.322021	nan	nan	[-1]	None	17.1429	6	Specific for Cluster #3	[HLA-DPA1, HLA-DQA1]	[HLA-DPA1, HLA-DPB1, HLA-DQA1, TTN]	[ACTN2, HLA-DPA1, HLA-DPB1, HLA-DQA1, PLN]	24.9074	49.8148	62.2685	[ACTN2, HLA-DPA1, HLA-DPB1, HLA-DQA1, PLN, TTN]
ds:H00527	Retinitis pigmentosa	KEGG-HUMAN-DISEASE_03.10.2018	0.830708	0.925107	nan	nan	[-1]	None	8.19672	5	Specific for Cluster #2	[PROM1, RGR, SLC7A14]	[PROM1, RGR, RPE65, SEMA4A, SLC7A14]	[RGR, SLC7A14]	41.9382	69.897	27.9588	[PROM1, RGR, RPE65, SEMA4A, SLC7A14]
ds:H01360	Allergic rhinitis	KEGG-HUMAN-DISEASE_03.10.2018	0.00895671	0.0424721	nan	nan	[-1]	None	31.5789	6	Specific for Cluster #3	[CCL5, CXCL10, CXCL11, CXCL9, FCGR2A]	[CXCL11, CXCL9, IL18]	[CCL5, CXCL10, CXCL11, CXCL9, FCGR2A, IL18]	56.5783	33.947	67.8939	[CCL5, CXCL10, CXCL11, CXCL9, FCGR2A, IL18]
ds:H01492	Systemic sclerosis; Systemic scleroderma	KEGG-HUMAN-DISEASE_03.10.2018	0.00486972	0.0265129	nan	nan	[-1]	None	35.2941	6	Specific for Cluster #2	[HLA-DPA1, HLA-DQA1, TNFAIP3]	[HLA-DPA1, HLA-DPB1, HLA-DQA1, IL1A, IL1R1]	[HLA-DPA1, HLA-DPB1, HLA-DQA1, IL1R1]	36.0529	60.0881	48.0705	[HLA-DPA1, HLA-DPB1, HLA-DQA1, IL1A, IL1R1, TNFAIP3]
