# Supplementary material
Source: publisher figshare collection journal article supplement (https://tandf.figshare.com/articles/dataset/_/9888425)
Supplement: Supplementary file 1 [file 2 › tbsd_a_1671231_sm6020.xlsx]

## Sheet: Sheet1
GOID	GOTerm	Term PValue Corrected with Benjamini-Hochberg	List of genes from Frontal Cortex	List of genes from Hippocampus	List of genes from Temporal cortex	%Genes from Frontal Cortex	%Genes from Hippocampus	%Genes from Temporal cortex
GO:0007165	signal transduction	2.07105e-17	[ACKR1, ACVR1C, ADGRA3, ADH7, ADRA1B, AGT, AIM2, AKAP5, AKR1C1, AKR1C2, ANGPT2, ANOS1, ANXA2, APBB1IP, APLNR, AQP1, ARAP3, ARC, AREG, ARF4, ASPA, ATRX, B2M, BAG3, BAMBI, BDH2, BDNF, BGN, BID, BLOC1S2, BMP3, BMP5, BMP6, BRCC3, BTBD11, BTN3A1, C3, CACNG3, CAMLG, CARTPT, CASP4, CCDC3, CCKBR, CCL2, CCL20, CCL5, CCNA2, CD109, CD177, CD38, CD44, CDKL2, CEP55, CHI3L1, CHML, CHN2, CHRNB2, CLEC5A, CRHBP, …	[ABR, ACKR1, ADAMTS1, ADAP1, ADCYAP1, ADGRA3, ADGRE1, ADORA3, AKAP5, AKR1C1, AKR1C2, AKR1C3, ANGPT1, ANO6, ANXA1, ANXA6, APCDD1, APLNR, AQP1, ARHGAP36, ARHGAP6, ARRDC3, ASB17, ASPA, ATP2B2, ATP6V0D1, ATP6V1C1, ATP6V1E1, BAIAP2L1, BCL11A, BCL6, BDNF, BGN, BLOC1S2, BMP6, BRINP1, BSN, BTG2, CA1, CACNB3, CACNG3, CALB2, CAMK1D, CAMK1G, CCDC3, CCKBR, CCL19, CCL2, CD109, CD24, CD38, CD44, CD53, CDC34, C…	[A2M, ACKR1, ACTN2, ADGRA3, ADGRE1, ADGRE2, AGT, AHCYL1, AKAP5, AKR1C1, AKR1C2, ANGPT2, ANXA1, ANXA2, ANXA4, APCDD1, APLNR, AQP1, ARAP3, ARHGAP15, ARHGAP18, ARHGAP6, ARRDC3, ASB17, ASPA, ATP6V0D2, AVPI1, B2M, BDNF, BMP1, C3, CACNG4, CAMK2D, CAV1, CCL19, CCL2, CCL5, CCRL2, CD109, CD24, CD36, CD38, CD44, CDH13, CDK1, CHGB, CHI3L1, CITED2, CLEC4E, CLEC5A, CMTM5, CNIH2, COLEC12, CORO1A, CPAMD8, CR1, …	45.7673	45.0108	41.2284
GO:0070887	cellular response to chemical stimulus	6.83321e-17	[ACKR1, AGT, AIM2, AKR1C1, AKR1C2, ANGPT2, ANOS1, ANXA2, AQP1, AQP9, ARC, AREG, AS3MT, ASPA, ATRX, B2M, BAMBI, BCHE, BDNF, BGN, BMP3, BMP5, BMP6, BRINP3, BRIP1, C3, CALB1, CARD17, CASP4, CCDC3, CCL2, CCL20, CCL5, CCNA2, CD109, CD44, CH25H, CHI3L1, CHRNB2, CPT1A, CRHBP, CRYZ, CTGF, CTSH, CUZD1, CX3CR1, CXCL10, CXCL11, CXCL8, CXCL9, CYP1B1, CYP3A5, CYR61, DDX58, DOK5, DRD5, DUSP6, EDNRB, EGR1, EGR2…	[AACS, ACKR1, ADAM23, ADCYAP1, AKR1C1, AKR1C2, AKR1C3, ANGPT1, ANO6, ANXA1, AQP1, ASPA, ASS1, ATP1A3, ATP2B2, ATP6V0D1, ATP6V1C1, ATP6V1E1, BAIAP2L1, BCL6, BDNF, BGN, BMP6, BRINP1, BRINP3, BTG2, CA1, CACNB3, CALB2, CAMK1D, CCDC3, CCL19, CCL2, CD109, CD24, CD44, CDC34, CDK1, CDK5, CES1, CHRDL1, CHRNB2, CIB2, COLEC12, CRHR2, CRIP2, CX3CL1, CXCL11, CXCL2, CXCL9, CXCR4, CYP1B1, DCN, DUSP6, EDN1, EGR3…	[ACKR1, ACTN2, ADGRE2, AGT, AHCYL1, AKR1C1, AKR1C2, ALPL, ANGPT2, ANXA1, ANXA2, AQP1, AQP4, AQP9, AS3MT, ASPA, ATP6V0D2, B2M, B3GNT2, BDNF, BMP1, BRIP1, C3, CALB1, CAMK2D, CAV1, CCL19, CCL2, CCL5, CCRL2, CD109, CD24, CD36, CD44, CDK1, CHI3L1, CITED2, COLEC12, CORO1A, CRHBP, CROT, CSF1, CSPG4, CSRP1, CTH, CTSH, CTSL, CTSS, CXCL10, CXCL11, CXCL16, CXCL8, CXCL9, CXCR4, CYBB, CYP1A1, CYP1B1, CYP3A5, …	47.1255	45.3052	43.0803
GO:0010033	response to organic substance	1.62478e-15	[ACKR1, ACVR1C, ADH7, AGT, AIM2, AKR1C1, AKR1C2, ANGPT2, ANOS1, ANXA2, AQP1, AQP9, ARC, AREG, ASPA, ATRX, B2M, BAMBI, BCHE, BDNF, BGN, BMP3, BMP5, BMP6, BRINP3, BRIP1, C3, CALB1, CARD17, CASP4, CCDC3, CCL2, CCL20, CCL5, CCNA2, CD109, CD38, CD44, CHI3L1, CHRNB2, CPT1A, CRHBP, CTGF, CTSH, CUZD1, CX3CR1, CXCL10, CXCL11, CXCL8, CXCL9, CYP1B1, CYR61, DDX58, DNAJB4, DNAJB5, DOK5, DRD5, DUSP6, EDNRB, EG…	[AACS, ABR, ACKR1, ADAM23, ADCYAP1, AKR1C1, AKR1C2, AKR1C3, ANGPT1, ANXA1, AQP1, ASPA, ASS1, ATP1A3, ATP2B2, ATP6V0D1, ATP6V1C1, ATP6V1E1, BAIAP2L1, BCL6, BDNF, BGN, BMP6, BRINP1, BRINP3, BTG2, CA1, CALB2, CCDC3, CCL19, CCL2, CD109, CD24, CD38, CD44, CDC34, CDK1, CDK5, CES1, CHRDL1, CHRNB2, CIB2, COLEC12, CRHR2, CRIP2, CX3CL1, CXCL11, CXCL2, CXCL9, CXCR4, CYP1B1, DCN, DHCR24, DNAJB5, DUSP6, EDN1,…	[ACKR1, ACTN2, AGT, AHCYL1, AKR1C1, AKR1C2, ALPL, ANGPT2, ANXA1, ANXA2, AQP1, AQP4, AQP9, ASPA, ATP6V0D2, B2M, B3GNT2, BDNF, BMP1, BRIP1, C3, CA3, CACNG4, CALB1, CAMK2D, CAV1, CCL19, CCL2, CCL5, CCRL2, CD109, CD24, CD36, CD38, CD44, CDH13, CDK1, CHI3L1, CITED2, COLEC12, CORO1A, CRHBP, CROT, CRYAB, CSF1, CSPG4, CSRP1, CTH, CTSH, CTSL, CTSS, CXCL10, CXCL11, CXCL16, CXCL8, CXCL9, CXCR4, CYBB, CYP1A1…	46.3365	44.7107	42.4752
GO:0071310	cellular response to organic substance	3.65002e-13	[ACKR1, AGT, AIM2, AKR1C1, AKR1C2, ANGPT2, ANOS1, ANXA2, AQP1, AQP9, ARC, AREG, ASPA, B2M, BAMBI, BDNF, BGN, BMP3, BMP5, BMP6, BRINP3, BRIP1, C3, CALB1, CARD17, CASP4, CCDC3, CCL2, CCL20, CCL5, CCNA2, CD109, CD44, CHI3L1, CHRNB2, CPT1A, CRHBP, CTGF, CTSH, CX3CR1, CXCL10, CXCL11, CXCL8, CXCL9, CYP1B1, CYR61, DDX58, DOK5, DRD5, DUSP6, EDNRB, EGR1, EGR2, EGR3, ERO1A, F13A1, F3, FABP4, FAS, FCGR2A, F…	[AACS, ACKR1, ADAM23, ADCYAP1, AKR1C1, AKR1C2, AKR1C3, ANGPT1, ANXA1, AQP1, ASPA, ASS1, ATP1A3, ATP2B2, ATP6V0D1, ATP6V1C1, ATP6V1E1, BAIAP2L1, BCL6, BDNF, BGN, BMP6, BRINP1, BRINP3, CA1, CALB2, CCDC3, CCL19, CCL2, CD109, CD24, CD44, CDC34, CDK5, CES1, CHRDL1, CHRNB2, CIB2, COLEC12, CRHR2, CX3CL1, CXCL11, CXCL2, CXCL9, CXCR4, CYP1B1, DCN, DUSP6, EDN1, EGR3, EPHA4, F13A1, FAM89B, FCGR2B, FGF5, FGF…	[ACKR1, ACTN2, AGT, AHCYL1, AKR1C1, AKR1C2, ALPL, ANGPT2, ANXA1, ANXA2, AQP1, AQP4, AQP9, ASPA, ATP6V0D2, B2M, B3GNT2, BDNF, BMP1, BRIP1, C3, CALB1, CAMK2D, CAV1, CCL19, CCL2, CCL5, CCRL2, CD109, CD24, CD36, CD44, CHI3L1, CITED2, COLEC12, CORO1A, CRHBP, CROT, CSF1, CSPG4, CTH, CTSH, CTSL, CTSS, CXCL10, CXCL11, CXCL8, CXCL9, CXCR4, CYBB, CYP1A1, CYP1B1, CYP7A1, DAB2, DKK1, EGR2, EGR3, F13A1, FAS, …	47.579	44.9088	41.753
GO:0032879	regulation of localization	8.28246e-13	[ACKR1, ACVR1C, AGT, AHNAK, AIM2, AKAP5, ANGPT2, ANXA2, APLNR, APOC1, AQP1, ARAP3, ARC, AREG, ARV1, ASPA, B2M, BAG3, BDNF, BID, BMP5, BMP6, C3, CACNA1G, CACNG3, CARD17, CARTPT, CATSPER2, CCL2, CCL20, CCL5, CCNA2, CD177, CD38, CHRNB2, CLEC5A, CLIC6, CPT1A, CRHBP, CTSH, CUZD1, CX3CR1, CXCL10, CXCL11, CXCL8, CXCL9, CYP1B1, CYR61, DDX58, DSP, EDNRA, EDNRB, EHD3, ENSA, ERO1A, F3, FAS, FCGR2A, FERMT1, …	[AACS, ABR, ACKR1, ADAMTS1, ADAMTS9, ADCYAP1, ADORA3, AHNAK, AKAP5, ANGPT1, ANO6, ANXA1, APLNR, AQP1, ASPA, ATP1A3, ATP2B2, BCL6, BDNF, BMP6, BSN, CACNB3, CACNB4, CACNG3, CAMK1D, CCL19, CCL2, CD38, CDK1, CDK5, CFH, CHRNB2, CHRNB3, CLEC5A, CLEC9A, CNIH2, CPLX1, CX3CL1, CXCL11, CXCL2, CXCL9, CYP1B1, DCLK1, DCN, DPP4, DSP, EDN1, EHD3, ENC1, EXPH5, FAM89B, FCGR2B, FEZF2, FGF9, FN1, FRZB, FXYD7, GABRE…	[ACKR1, ACTN2, ADGRE2, AGT, AHCYL1, AHNAK, AKAP5, ANGPT2, ANXA1, ANXA2, ANXA4, APLNR, APOC1, AQP1, ARAP3, ARHGAP18, ASPA, B2M, B4GALT1, BDNF, BMP1, C3, CACNG4, CAMK2D, CAV1, CCDC39, CCL19, CCL2, CCL5, CD36, CD38, CD84, CDH13, CDK1, CEMIP, CFH, CITED2, CLEC4E, CLEC5A, CNIH2, CORO1A, CPAMD8, CRHBP, CRYAB, CSF1, CSRP1, CTSH, CTSS, CXCL10, CXCL11, CXCL16, CXCL8, CXCL9, CYBB, CYP1B1, DAB2, DEPP1, DKK1…	42.2458	44.6738	45.4021
GO:0007186	G-protein coupled receptor signaling pathway	1.44759e-12	[ACKR1, ADGRA3, ADRA1B, AGT, AKAP5, AKR1C1, AKR1C2, APLNR, AREG, C3, CARTPT, CCKBR, CCL2, CCL20, CCL5, CHML, CX3CR1, CXCL10, CXCL11, CXCL8, CXCL9, DRD5, EDNRA, EDNRB, FSHB, FSHR, GABRA5, GLP2R, GLRA1, GLRA2, GNA14, GPR183, GPR26, GPR65, GPR83, GUCA1C, HOMER1, INHBA, KCNK2, LGR5, MAS1, MCHR1, MET, NET1, NPY4R, NR4A1, OPN5, OR13C2, OR13D1, OR14I1, OR1C1, OR1E2, OR1J2, OR1J4, OR1L1, OR1L3, OR1Q1, OR…	[ABR, ACKR1, ADCYAP1, ADGRA3, ADGRE1, ADORA3, AKAP5, AKR1C1, AKR1C2, AKR1C3, ANXA1, APLNR, ARRDC3, ATP2B2, CCKBR, CCL19, CCL2, CHML, CRHR2, CX3CL1, CXCL11, CXCL2, CXCL9, CXCR4, EDN1, ENC1, FRZB, FSHR, GABBR2, GABRA1, GABRA2, GABRA3, GABRA5, GABRG2, GLP2R, GNAL, GPNMB, GPR146, GPR183, GPR26, GPR34, GUCA1C, HOMER1, HTR1A, HTR1D, HTR2A, HTR2C, INHBA, MAS1, MET, NPY, NPY5R, NR4A1, NTSR1, OPRK1, OR14I…	[ACKR1, ACTN2, ADGRA3, ADGRE1, ADGRE2, AGT, AHCYL1, AKAP5, AKR1C1, AKR1C2, ANXA1, APLNR, ARRDC3, C3, CAV1, CCL19, CCL2, CCL5, CCRL2, CPAMD8, CXCL10, CXCL11, CXCL16, CXCL8, CXCL9, CXCR4, ENC1, F2R, FABP7, FSHR, GABRA2, GABRA5, GABRG1, GLP2R, GLRA2, GLRA3, GNG2, GPR146, GPR17, GPR174, GPR183, GPR26, GPR32, GPR34, GPR37, GPR65, GPR82, HOMER1, HTR1F, HTR2A, INHBA, KLK6, LPAR3, LPAR4, MET, NECAB2, NMU…	47.9022	41.9674	44.9348
GO:0034097	response to cytokine	2.54484e-12	[ACKR1, AIM2, ANXA2, ARC, B2M, BGN, CASP4, CCDC3, CCL2, CCL20, CCL5, CD38, CD44, CHI3L1, CRHBP, CX3CR1, CXCL10, CXCL11, CXCL8, CXCL9, DDX58, EGR1, F13A1, F3, FABP4, FAS, FOS, GBA, GBP2, GBP4, GBP5, GREM2, HIST1H3I, HLA-A, HLA-DPA1, HLA-DQA1, HLA-DRA, HLA-G, HMOX1, ICAM1, IFI35, IFI6, IFIH1, IFIT1, IFIT2, IFIT3, IFITM3, IL13RA1, IL13RA2, IL1RAPL2, IL2RG, IL34, INHBA, IRF1, IRF9, JUN, KLF4, KLF5, L…	[ACKR1, ADAM23, ANGPT1, ANXA1, ASS1, BCL6, BGN, CA1, CCDC3, CCL19, CCL2, CD24, CD38, CD44, CDC34, CES1, CX3CL1, CXCL11, CXCL2, CXCL9, CXCR4, DCN, EDN1, F13A1, FLRT3, FN1, FOS, FSCN1, GBA, GBP2, GBP3, GFPT2, GHR, GREM2, HAMP, HIST1H3B, HIST1H3F, HLA-DPA1, HLA-DPB1, HLA-DQA1, HLA-DRA, HSPA1A, IFI6, IL12RB2, IL17RB, IL18, IL18RAP, IL1A, IL1R1, IL1R2, IL1RL1, IL33, INA, INHBA, IRAK3, JUNB, JUND, LRRC…	[ACKR1, ANXA1, ANXA2, AQP4, B2M, B3GNT2, CAMK2D, CAV1, CCL19, CCL2, CCL5, CCRL2, CD24, CD36, CD38, CD44, CHI3L1, CORO1A, CRHBP, CROT, CSF1, CTH, CXCL10, CXCL11, CXCL16, CXCL8, CXCL9, CXCR4, F13A1, FAS, FKBP1A, GBP2, GBP3, GBP4, GBP5, GPR17, HIST1H3E, HLA-DPA1, HLA-DPB1, HLA-DQA1, HLA-DRA, ICAM1, IFITM3, IL12RB2, IL13RA1, IL13RA2, IL18, IL18RAP, IL1R1, IL34, INHBA, INSL6, IRF8, JUNB, MMP3, MSN, NM…	47.8096	45.9882	39.6136
GO:0051240	positive regulation of multicellular organismal process	2.00106e-11	[ACADL, ADRA1B, AGT, AIM2, ANGPT2, ANGPTL4, ANXA2, APLNR, AQP1, AREG, ASPA, B2M, BAMBI, BDNF, BMP5, BMP6, BRINP3, C3, CARTPT, CCL20, CCNA2, CD38, CHI3L1, CLEC5A, CPT1A, CTGF, CTSH, CX3CR1, CXCL8, CYP1B1, CYR61, DCT, DDX58, DDX60, DHX58, DIO2, EDNRB, EGR1, EGR3, EVI2B, F3, FABP4, FERMT1, FIG4, FOS, FOXP2, FSHB, GBA, GBP5, GFAP, GH1, GJA1, HLA-A, HLA-DPA1, HLA-G, HMOX1, ICAM1, IFI16, IFIH1, IGSF9B,…	[ADCYAP1, ANGPT1, ANGPTL4, ANO6, ANXA1, APLNR, AQP1, ASPA, ATP1A3, BCL6, BDNF, BMP6, BRINP1, BRINP3, C6, CACNB3, CAMK1D, CCL19, CD24, CD38, CDK1, CFH, CLEC5A, CLEC9A, CPNE9, CX3CL1, CXCR4, CYP1B1, DIO2, EDN1, EGR3, ENAM, ENC1, EPHA4, EPHB6, ETV5, EVI2B, FEZF2, FGF9, FLRT3, FN1, FOS, GBA, GHR, GJA1, GREM1, HAMP, HLA-DPA1, HLA-DPB1, HSPA1A, HTR2A, IBSP, IFI16, IGSF9B, IL12RB2, IL17RB, IL18, IL1A, I…	[AGT, ANGPT2, ANGPTL4, ANXA1, ANXA2, APLNR, AQP1, ASPA, B2M, B4GALT1, BDNF, BMP1, C21orf91, C3, CAMK2D, CAV1, CCL19, CD24, CD36, CD38, CDK1, CFH, CHI3L1, CITED2, CLEC4E, CLEC5A, CRABP2, CSF1, CTH, CTSH, CXCL8, CXCR4, CYBB, CYP1B1, DAB2, DIO2, DKK1, EGR3, ENC1, ENPP2, F2R, FEZF2, FGF1, FLG, GBP5, GDPD2, GFAP, GJA1, HILPDA, HLA-DPA1, HLA-DPB1, HMGB2, HSPB6, HTR2A, ICAM1, IFI16, IGSF9B, IL12RB2, IL1…	43.5651	43.5651	44.6024
GO:0006811	ion transport	2.51155e-11	[AGT, AHNAK, AKR1C1, APLNR, APOC1, AQP1, AQP9, ARC, ASPA, B2M, C3, CA12, CACNA1G, CACNG3, CATSPER2, CCL2, CCL5, CHRNB2, CLIC6, COX7B, CP, CPT1A, CRHBP, CTGF, CUZD1, CXCL10, CXCL11, CXCL9, EHD3, ERO1A, F3, FABP3, FABP4, GABRA5, GABRE, GADL1, GJA1, GLRA1, GLRA2, GRIK1, GRIN2B, HBB, HOMER1, HPCA, ICAM1, KCNA3, KCNIP3, KCNK1, KCNK2, KCNMB2, KCNS2, LDLR, MCHR1, MT1B, NET1, NKAIN1, ODC1, ORAI2, P2RX7, …	[ADCYAP1, AHNAK, AKR1C1, ANO6, ANXA1, ANXA6, APLNR, AQP1, ASPA, ATP1A3, ATP2B2, ATP2B3, ATP6V0D1, ATP6V1C1, ATP6V1E1, CA1, CA12, CACNB3, CACNB4, CACNG3, CCL19, CCL2, CDH23, CDK5, CFH, CHRNA1, CHRNB2, CHRNB3, CNIH2, COX7B, CP, CX3CL1, CXCL11, CXCL9, EDN1, EHD3, FABP3, FXYD7, GABRA1, GABRA2, GABRA3, GABRA5, GABRE, GABRG2, GABRQ, GEM, GJA1, GOT2, GRIN2A, HAMP, HBB, HCN1, HCN2, HOMER1, HPCA, HTR1A, H…	[ACTN2, AGT, AHCYL1, AHNAK, AKR1C1, ANXA1, APLNR, APOC1, AQP1, AQP4, AQP9, ASPA, ATP6V0D2, ATP8B4, B2M, C3, CA12, CA3, CACNG4, CALHM5, CAMK2D, CAV1, CCL19, CCL2, CCL5, CD36, CD84, CEMIP, CFH, CNIH2, CORO1A, COX6C, CP, CRHBP, CROT, CTSS, CXCL10, CXCL11, CXCL9, CYBB, DEPP1, DKK1, F2R, FABP3, FKBP1A, FLG, GABRA2, GABRA5, GABRG1, GABRQ, GJA1, GLRA2, GLRA3, GRIN2B, HBB, HOMER1, HPCA, HSPA2, HTR2A, ICA…	41.7361	46.5376	49.4923
GO:0051239	regulation of multicellular organismal process	4.60622e-11	[ACADL, ACKR1, ACVR1C, ADRA1B, AGT, AIM2, ANGPT2, ANGPTL4, ANXA2, APLNR, APOC1, AQP1, ARC, AREG, ASPA, B2M, BAMBI, BDNF, BMP5, BMP6, BRINP3, C3, CACNA1G, CARD17, CARTPT, CCL20, CCNA2, CD109, CD38, CHI3L1, CHRNB2, CLEC5A, CPT1A, CRHBP, CTGF, CTSH, CUZD1, CX3CR1, CXCL10, CXCL8, CYP1B1, CYR61, DCT, DDX58, DDX60, DHX58, DIO2, DSP, DUSP6, EDNRB, EFEMP1, EFNA3, EFNB3, EGR1, EGR2, EGR3, EHD3, EVI2B, F3,…	[ABR, ACKR1, ADAMTS9, ADCYAP1, ADORA3, ALDH1A1, ANGPT1, ANGPTL4, ANO6, ANXA1, ANXA6, APLNR, APOLD1, AQP1, ARRDC3, ASPA, ATP1A3, ATP2B2, ATP2B3, BCL6, BDNF, BMP6, BRINP1, BRINP3, C6, CACNB3, CAMK1D, CCL19, CD109, CD24, CD38, CDK1, CDK5, CFH, CHRNB2, CLEC5A, CLEC9A, CNIH2, CPNE9, CR1, CX3CL1, CXCR4, CYP1B1, DCN, DIO2, DSP, DUSP6, EAF2, EDN1, EFNB3, EGR3, EHD3, ENAM, ENC1, EPHA4, EPHB6, ETV5, EVI2B,…	[ACKR1, AGT, AHCYL1, ALDOC, ANGPT2, ANGPTL4, ANXA1, ANXA2, ANXA4, APLNR, APOC1, APOLD1, AQP1, ARRDC3, ASPA, B2M, B4GALT1, BDNF, BMP1, C21orf91, C3, CACNG4, CAMK2D, CAV1, CCL19, CD109, CD24, CD36, CD38, CD84, CDK1, CFH, CHI3L1, CITED2, CLEC4E, CLEC5A, CNIH2, CR1, CRABP2, CRHBP, CSF1, CSRP1, CTH, CTSH, CTSL, CXCL10, CXCL8, CXCR4, CYBB, CYP1B1, DAAM2, DAB2, DCC, DIO2, DKK1, DSC2, DSC3, DSP, EFEMP1, …	43.4976	46.2304	44.4085
GO:0048731	system development	1.04559e-10	[ACKR1, AEBP1, AGT, AKR1C1, ANGPT2, ANGPTL4, ANOS1, ANXA2, APLNR, AQP1, ARC, AREG, ARF4, ASPA, ATRX, B2M, BAG3, BAMBI, BCHE, BDNF, BLOC1S2, BMP3, BMP5, BMP6, BRINP3, BRIP1, C3, CA10, CALB1, CARTPT, CCKBR, CCL2, CCNA2, CCNB2, CD109, CD38, CD44, CEP55, CERS3, CHI3L1, CHRNB2, CLEC5A, COX7B, CTGF, CTSH, CX3CR1, CXCL10, CXCL8, CYP1B1, CYR61, DCT, DOK5, DSP, DUSP6, EDNRA, EDNRB, EFEMP1, EFNA3, EFNB3, E…	[AACS, ABR, ACKR1, ADAM23, ADAMTS1, ADAMTS9, ADCYAP1, AEBP1, AKR1C1, AKR1C3, ANGPT1, ANGPTL4, ANO6, ANXA1, APCDD1, APLNR, APOLD1, AQP1, ARRDC3, ASPA, ASS1, ATP2B2, ATP6V0D1, ATP6V1C1, BCAN, BCL11A, BCL6, BDNF, BLOC1S1, BLOC1S2, BMP6, BRINP1, BRINP3, BSN, BTG2, C6, CAMK1D, CCKBR, CCL19, CCL2, CD109, CD24, CD38, CD44, CDH23, CDHR1, CDK1, CDK5, CES1, CFH, CHRDL1, CHRNA1, CHRNB2, CLEC5A, CNTN5, COLEC…	[ACKR1, ACTG2, ACTN2, AEBP1, AGT, AKR1C1, ALPL, ANGPT2, ANGPTL4, ANLN, ANXA1, ANXA2, APCDD1, APLNR, APOLD1, AQP1, ARRDC3, ASPA, B2M, B3GNT2, B4GALT1, BCAN, BDNF, BHLHE22, BMP1, BRIP1, BTG4, C21orf91, C3, CA10, CALB1, CAMK2D, CAV1, CCDC39, CCL19, CCL2, CD109, CD24, CD36, CD38, CD44, CDH13, CDH9, CDK1, CDX4, CERS3, CFH, CHI3L1, CITED2, CLEC4E, CLEC5A, CNTN5, COLEC12, CPAMD8, CR1, CRABP2, CRYAB, CSF…	39.4263	47.9902	44.1122
GO:0023051	regulation of signaling	1.83819e-10	[ACKR1, ACVR1C, ADH7, ADRA1B, AGT, AKAP5, AKR1C1, AKR1C2, ANXA2, APLNR, ARAP3, ARC, AREG, BAMBI, BCHE, BDH2, BDNF, BGN, BID, BMP3, BMP5, BMP6, C3, CACNG3, CALB1, CAMLG, CARTPT, CASP4, CCDC3, CCL2, CCL20, CCL5, CCNA2, CD109, CD177, CD38, CD44, CEP55, CHI3L1, CHN2, CHRNB2, CPT1A, CRHBP, CTGF, CTSH, CX3CR1, CXCL10, CXCL11, CXCL8, CXCL9, CXXC5, CYP1B1, CYR61, DDX60, DHX58, DKK2, DOK5, DRD5, DUSP19, D…	[AACS, ABR, ACKR1, ADCYAP1, AKAP5, AKR1C1, AKR1C2, AKR1C3, ANGPT1, ANXA1, APCDD1, APLNR, ARHGAP36, ARHGAP6, ARRDC3, ATP2B2, ATP2B3, ATP6V1C1, BAIAP2L1, BCL6, BDNF, BGN, BMP6, BRINP1, CACNB3, CACNG3, CALB2, CCDC3, CCL19, CCL2, CD109, CD24, CD38, CD44, CDC34, CDK1, CDK5, CHGB, CHRDL1, CHRNB2, CHRNB3, CIB2, CNIH2, COLEC12, CPLX1, CX3CL1, CXCL11, CXCL2, CXCL9, CXCR4, CYP1B1, DCN, DPP4, DUSP14, DUSP4,…	[A2M, ACKR1, AGT, AHCYL1, AKAP5, AKR1C1, AKR1C2, ANXA1, ANXA2, APCDD1, APLNR, ARAP3, ARHGAP15, ARHGAP18, ARHGAP6, ARRDC3, AVPI1, BDNF, BMP1, C3, CACNG4, CALB1, CAMK2D, CAV1, CCL19, CCL2, CCL5, CD109, CD24, CD36, CD38, CD44, CDH13, CDK1, CHGB, CHI3L1, CITED2, CMTM5, CNIH2, COLEC12, CPAMD8, CRABP2, CRHBP, CROT, CSF1, CSPG4, CTH, CTSH, CXCL10, CXCL11, CXCL16, CXCL8, CXCL9, CXCR4, CYP1B1, DAAM2, DAB2…	44.8754	44.6732	43.2582
GO:0007166	cell surface receptor signaling pathway	3.6696e-10	[ACKR1, ACVR1C, ADGRA3, AGT, AIM2, ANGPT2, ANOS1, ANXA2, ARC, AREG, ARF4, B2M, BAG3, BAMBI, BDNF, BGN, BID, BLOC1S2, BMP3, BMP5, BMP6, BTBD11, BTN3A1, C3, CACNG3, CAMLG, CASP4, CCDC3, CCKBR, CCL2, CCL20, CCL5, CCNA2, CD109, CD177, CD38, CD44, CHRNB2, CRHBP, CTGF, CX3CR1, CXCL10, CXCL11, CXCL8, CXCL9, CYR61, DKK2, DOK5, DUSP6, EDNRB, EFEMP1, EFNA3, EFNB3, EGR1, EPGN, F13A1, F3, FAS, FCGR2A, FERMT1…	[ACKR1, ADAMTS1, ADAP1, ADGRA3, ADGRE1, ADORA3, ANGPT1, ANO6, ANXA1, APCDD1, ATP6V0D1, ATP6V1C1, ATP6V1E1, BAIAP2L1, BCL6, BDNF, BGN, BLOC1S2, BMP6, BRINP1, CA1, CACNB3, CACNG3, CALB2, CCDC3, CCKBR, CCL19, CCL2, CD109, CD24, CD38, CD44, CD53, CDK5, CES1, CHRDL1, CHRNA1, CHRNB2, CHRNB3, CIB2, CNIH2, CR1, CRHR2, CSNK1G2, CX3CL1, CXCL11, CXCL2, CXCL9, CXCR4, DCN, DUSP6, EDN1, EFNB3, ELMO2, EPHA4, EP…	[ACKR1, ADGRA3, ADGRE1, ADGRE2, AGT, ANGPT2, ANXA1, ANXA2, ANXA4, APCDD1, ATP6V0D2, B2M, BDNF, BMP1, C3, CACNG4, CAMK2D, CAV1, CCL19, CCL2, CCL5, CCRL2, CD109, CD24, CD36, CD38, CD44, CDH13, CITED2, CLEC4E, CNIH2, CORO1A, CR1, CRHBP, CROT, CSF1, CSPG4, CXCL10, CXCL11, CXCL8, CXCL9, CXCR4, CYBB, DAAM2, DAB2, DCC, DKK1, EFEMP1, EFNB3, ELMO2, EMP2, ERC2, F13A1, FAS, FCGR2A, FCGR2B, FGF1, FKBP1A, FLG…	46.7881	42.1093	43.279
GO:0010646	regulation of cell communication	4.92574e-10	[ACKR1, ACVR1C, ADH7, ADRA1B, AGT, AKAP5, AKR1C1, AKR1C2, APLNR, ARAP3, ARC, AREG, BAMBI, BCHE, BDH2, BDNF, BGN, BID, BMP3, BMP5, BMP6, C3, CACNG3, CALB1, CARTPT, CASP4, CCDC3, CCL2, CCL20, CCL5, CCNA2, CD109, CD177, CD38, CD44, CEP55, CHI3L1, CHN2, CHRNB2, CPT1A, CRHBP, CTGF, CTSH, CX3CR1, CXCL10, CXCL11, CXCL8, CXCL9, CXXC5, CYP1B1, CYR61, DDX60, DHX58, DKK2, DOK5, DRD5, DUSP19, DUSP5, DUSP6, E…	[AACS, ABR, ACKR1, ADCYAP1, AKAP5, AKR1C1, AKR1C2, AKR1C3, ANGPT1, ANXA1, APCDD1, APLNR, ARHGAP36, ARHGAP6, ARRDC3, ATP2B2, ATP6V1C1, BAIAP2L1, BCL6, BDNF, BGN, BMP6, BRINP1, CACNB3, CACNG3, CALB2, CCDC3, CCL19, CCL2, CD109, CD24, CD38, CD44, CDC34, CDK1, CDK5, CHGB, CHRDL1, CHRNB2, CHRNB3, CIB2, CNIH2, COLEC12, CPLX1, CX3CL1, CXCL11, CXCL2, CXCL9, CXCR4, CYP1B1, DCN, DPP4, DUSP14, DUSP4, DUSP6, …	[A2M, ACKR1, AGT, AKAP5, AKR1C1, AKR1C2, ANXA1, APCDD1, APLNR, ARAP3, ARHGAP15, ARHGAP18, ARHGAP6, ARRDC3, AVPI1, BDNF, BMP1, C3, CACNG4, CALB1, CAMK2D, CAV1, CCL19, CCL2, CCL5, CD109, CD24, CD36, CD38, CD44, CDH13, CDK1, CHGB, CHI3L1, CITED2, CMTM5, CNIH2, COLEC12, CPAMD8, CRABP2, CRHBP, CROT, CSF1, CSPG4, CTH, CTSH, CXCL10, CXCL11, CXCL16, CXCL8, CXCL9, CXCR4, CYP1B1, DAAM2, DAB2, DCC, DKK1, DL…	44.5151	44.9253	43.4894
GO:0007275	multicellular organism development	1.22855e-09	[ACKR1, ACVR1C, ADRA1B, AEBP1, AGT, AKR1C1, ANGPT2, ANGPTL4, ANOS1, ANXA2, APLNR, AQP1, ARC, AREG, ARF4, ASPA, ATRX, B2M, BAG3, BAMBI, BCHE, BDNF, BLOC1S2, BMP3, BMP5, BMP6, BRINP3, BRIP1, C3, CA10, CALB1, CARTPT, CATSPER2, CCKBR, CCL2, CCNA2, CCNB2, CD109, CD38, CD44, CEP55, CERS3, CHI3L1, CHRNB2, CLEC5A, COX7B, CTGF, CTSH, CX3CR1, CXCL10, CXCL8, CYP1B1, CYR61, DCT, DKK2, DOK5, DPPA3P2, DSP, DUS…	[AACS, ABR, ACKR1, ADAM23, ADAMTS1, ADAMTS9, ADCYAP1, AEBP1, AKR1C1, AKR1C3, ANGPT1, ANGPTL4, ANO6, ANXA1, APCDD1, APLNR, APOLD1, AQP1, ARRDC3, ASPA, ASS1, ATP2B2, ATP6V0D1, ATP6V1C1, BCAN, BCL11A, BCL6, BDNF, BLOC1S1, BLOC1S2, BMP6, BRINP1, BRINP3, BSN, BTG2, C6, CAMK1D, CCKBR, CCL19, CCL2, CD109, CD24, CD38, CD44, CDH23, CDHR1, CDK1, CDK5, CES1, CFH, CHRDL1, CHRNA1, CHRNB2, CLEC5A, CNTN5, COLEC…	[ACKR1, ACTG2, ACTN2, AEBP1, AGT, AKR1C1, ALPL, ANGPT2, ANGPTL4, ANLN, ANXA1, ANXA2, APCDD1, APLNR, APOLD1, AQP1, ARRDC3, ASPA, B2M, B3GNT2, B4GALT1, BCAN, BDNF, BHLHE22, BMP1, BRIP1, BTG4, C21orf91, C3, CA10, CALB1, CAMK2D, CAV1, CCDC39, CCL19, CCL2, CCRL2, CD109, CD24, CD36, CD38, CD44, CDH13, CDH9, CDK1, CDX4, CERS3, CFH, CHI3L1, CITED2, CLEC4E, CLEC5A, CNTN5, COLEC12, CPAMD8, CR1, CRABP2, CRY…	39.7178	47.8113	43.3149
GO:0051049	regulation of transport	4.76762e-09	[ACVR1C, AGT, AHNAK, AIM2, ANXA2, APLNR, APOC1, AQP1, ARC, ARV1, ASPA, B2M, BAG3, BID, BMP6, C3, CACNA1G, CACNG3, CARD17, CARTPT, CATSPER2, CCL2, CCL5, CD177, CD38, CHRNB2, CLEC5A, CLIC6, CPT1A, CRHBP, CUZD1, CXCL10, CXCL11, CXCL9, DDX58, EDNRA, EDNRB, EHD3, ENSA, F3, FAS, FCGR2A, FERMT1, GABRE, GADL1, GAS1, GFAP, GH1, GJA1, GRASP, GZMB, HMOX1, HOMER1, HPCA, ICAM1, IFIH1, IL13RA2, INHBA, KCNA3, K…	[AACS, ABR, ADCYAP1, AHNAK, ANGPT1, ANO6, ANXA1, APLNR, AQP1, ASPA, ATP1A3, ATP2B2, BMP6, BSN, CACNB3, CACNB4, CACNG3, CAMK1D, CCL19, CCL2, CD38, CDK1, CDK5, CFH, CHRNB2, CHRNB3, CLEC5A, CLEC9A, CNIH2, CPLX1, CX3CL1, CXCL11, CXCL9, DPP4, EDN1, EHD3, EXPH5, FCGR2B, FN1, FXYD7, GABRE, GEM, GJA1, GREM1, HAMP, HCN1, HCN2, HOMER1, HPCA, HSPA1A, HTR1A, HTR2A, HTR2C, IBSP, IL17RB, IL1A, IL1R2, IL1RL1, I…	[ACTN2, ADGRE2, AGT, AHCYL1, AHNAK, ANXA1, ANXA2, ANXA4, APLNR, APOC1, AQP1, ASPA, B2M, C3, CACNG4, CAMK2D, CAV1, CCL19, CCL2, CCL5, CD36, CD38, CD84, CDH13, CDK1, CEMIP, CFH, CLEC4E, CLEC5A, CNIH2, CORO1A, CRHBP, CRYAB, CSRP1, CTSS, CXCL10, CXCL11, CXCL9, CYBB, DAB2, DEPP1, DKK1, ENSA, EXPH5, F2R, FAS, FCGR2A, FCGR2B, FKBP1A, FLG, GFAP, GJA1, HOMER1, HPCA, HSPA2, HTR2A, ICAM1, IL13RA2, INHBA, IT…	41.6325	47.5305	45.1019
GO:0023056	positive regulation of signaling	5.1662e-08	[ADRA1B, AGT, AKR1C1, AKR1C2, ANXA2, ARC, AREG, BAMBI, BDNF, BID, BMP3, BMP5, BMP6, C3, CACNG3, CALB1, CARTPT, CASP4, CCL2, CCL20, CCL5, CCNA2, CD38, CD44, CHI3L1, CHN2, CHRNB2, CTGF, CTSH, CX3CR1, CXCL10, CXCL11, CXCL9, CXXC5, CYP1B1, CYR61, DDX60, DHX58, DKK2, DOK5, DUSP19, DUSP5, DUSP6, EPGN, F3, FAS, FCGR2A, FERMT1, FSHR, GADD45A, GBA, GFAP, GH1, GJA1, GPR183, GPR65, GSKIP, GZMB, HMOX1, HOMER…	[AACS, ADCYAP1, AKR1C1, AKR1C2, AKR1C3, ANGPT1, ARHGAP6, ATP6V1C1, BDNF, BMP6, BRINP1, CACNB3, CACNG3, CCL19, CCL2, CD24, CD38, CD44, CDK1, CHRNB2, CIB2, COLEC12, CX3CL1, CXCL11, CXCL9, CXCR4, CYP1B1, DCN, DUSP6, EDN1, EPHA4, EPHB6, FCGR2B, FGF5, FGF9, FSHR, GBA, GHR, GJA1, GPNMB, GPR183, GRB14, GREM1, GRIN2A, HOMER1, HSPA1A, HTR2A, HTR2C, IBSP, IGSF9B, IL18, IL1R1, INHBA, ITGB3, KCNK1, KDR, KL, …	[AGT, AKR1C1, AKR1C2, ANXA2, ARHGAP6, AVPI1, BDNF, C3, CACNG4, CALB1, CAMK2D, CAV1, CCL19, CCL2, CCL5, CD24, CD36, CD38, CD44, CDH13, CDK1, CHI3L1, CITED2, COLEC12, CROT, CSF1, CSPG4, CTH, CTSH, CXCL10, CXCL11, CXCL9, CXCR4, CYP1B1, DAAM2, DAB2, DKK1, DLEU2, EMP2, F2R, FAS, FCGR2A, FCGR2B, FGF1, FKBP1A, FLG, FRAT1, FSHR, GFAP, GJA1, GPR17, GPR183, GPR37, GPR65, HOMER1, HTR2A, ICAM1, IGFBP5, IGFBP…	45.7563	42.488	45.3932
GO:0010647	positive regulation of cell communication	1.13479e-07	[ADRA1B, AGT, AKR1C1, AKR1C2, ARC, AREG, BAMBI, BDNF, BID, BMP3, BMP5, BMP6, C3, CACNG3, CALB1, CARTPT, CASP4, CCL2, CCL20, CCL5, CCNA2, CD38, CD44, CHI3L1, CHN2, CHRNB2, CTGF, CTSH, CX3CR1, CXCL10, CXCL11, CXCL9, CXXC5, CYP1B1, CYR61, DDX60, DHX58, DKK2, DOK5, DUSP19, DUSP5, DUSP6, EPGN, F3, FAS, FCGR2A, FERMT1, FSHR, GADD45A, GBA, GFAP, GH1, GJA1, GPR183, GPR65, GSKIP, GZMB, HMOX1, HOMER1, ICAM…	[AACS, ADCYAP1, AKR1C1, AKR1C2, AKR1C3, ANGPT1, ARHGAP6, ATP6V1C1, BDNF, BMP6, BRINP1, CACNB3, CACNG3, CCL19, CCL2, CD24, CD38, CD44, CDK1, CHRNB2, CIB2, COLEC12, CX3CL1, CXCL11, CXCL9, CXCR4, CYP1B1, DCN, DUSP6, EDN1, EPHA4, EPHB6, FCGR2B, FGF5, FGF9, FSHR, GBA, GHR, GJA1, GPNMB, GPR183, GRB14, GREM1, GRIN2A, HOMER1, HSPA1A, HTR2A, HTR2C, IBSP, IGSF9B, IL18, IL1R1, INHBA, ITGB3, KCNK1, KDR, KL, …	[AGT, AKR1C1, AKR1C2, ARHGAP6, AVPI1, BDNF, C3, CACNG4, CALB1, CAMK2D, CAV1, CCL19, CCL2, CCL5, CD24, CD36, CD38, CD44, CDH13, CDK1, CHI3L1, CITED2, COLEC12, CROT, CSF1, CSPG4, CTH, CTSH, CXCL10, CXCL11, CXCL9, CXCR4, CYP1B1, DAAM2, DAB2, DKK1, DLEU2, EMP2, F2R, FAS, FCGR2A, FCGR2B, FGF1, FKBP1A, FLG, FRAT1, FSHR, GFAP, GJA1, GPR17, GPR183, GPR37, GPR65, HOMER1, HTR2A, ICAM1, IGFBP5, IGFBP7, IGSF…	45.5465	42.608	45.5465
GO:0046903	secretion	1.16528e-07	[ACVR1C, AGT, AIM2, ANXA2, AQP1, AQP9, ASPA, B2M, BMP6, BTN3A1, BTN3A2, BTN3A3, C3, CACNA1G, CARD17, CARTPT, CBLN4, CCKBR, CCL5, CD109, CD177, CD38, CD44, CHI3L1, CHRNB2, CLEC5A, CPT1A, CRHBP, CTGF, CTSH, DDX58, DSP, EDNRB, ENSA, F13A1, F3, FCGR2A, FERMT1, FGL2, GBP5, GJA1, GMFG, HBB, HLA-A, HMOX1, IFIH1, IL13RA2, INHBA, KCNK2, KLF5, LYZ, MMP8, MT1B, NDUFA2, NNAT, NOV, NRN1, OAS2, OLR1, P2RX7, P2…	[AACS, ABR, ADCYAP1, ALDH1A1, ANGPT1, ANO6, ANXA1, AQP1, ASPA, ATP6V1C1, BMP6, CALB2, CBLN4, CCKBR, CCL19, CD109, CD38, CD44, CD53, CDK5, CHRNB2, CHRNB3, CLEC5A, CLEC9A, CPLX1, CR1, CX3CL1, DPP4, DSP, EDN1, EPHB6, EQTN, EXPH5, F13A1, F5, FCAR, FCGR2B, FN1, GJA1, GOT2, HBB, HPR, HSPA1A, HTR1A, HTR2A, HTR2C, IBSP, IL17RB, IL1A, IL1R1, IL1R2, IL1RL1, IL33, ILDR2, INHBA, ITGB3, LAMTOR3, LYZ, MIF, NAP…	[A2M, ACTN2, ADGRE2, AGT, ALDOC, ANXA1, ANXA2, ANXA4, AQP1, AQP9, ASPA, ATP8B4, B2M, B4GALT1, BMP1, C3, CAV1, CBLN4, CCL19, CCL5, CD109, CD36, CD38, CD44, CD84, CHI3L1, CLEC4E, CLEC5A, CORO1A, CPAMD8, CR1, CRHBP, CSRP1, CTSH, CTSS, CYBB, DSC1, DSC3, DSP, ENSA, ERC2, EXPH5, F13A1, F2R, FCGR2A, FCGR2B, FGL2, FLG, GBP5, GJA1, GZMK, HBB, HP, HPR, HTR2A, IL13RA2, IL1R1, ILDR2, INHBA, ITGB3, LAMP2, LYZ…	42.324	46.5182	48.806
GO:0048870	cell motility	1.42068e-07	[ACKR1, ACVR1C, AGT, ANGPT2, ARAP3, ARC, ARF4, ASPA, BAMBI, BMP5, C3, CATSPER2, CCL2, CCL20, CCL5, CCNA2, CD177, CD44, CH25H, CTGF, CTSH, CUZD1, CX3CR1, CXCL10, CXCL11, CXCL8, CXCL9, CYP1B1, CYR61, DDX58, DNAH8, EDNRB, EGR3, F3, FBXO45, FERMT1, FSHB, GJA1, GPR183, HMOX1, ICAM1, IGFBP5, INHBA, ITGA5, ITGB4, JCHAIN, JUN, KDR, KLF4, KLF5, MACF1, MAG, MCAM, MDK, MET, NDN, NDNF, NET1, NOV, NOX4, NR2E1…	[ABR, ACKR1, ADAMTS1, ADAMTS9, ADORA3, ANGPT1, ANO6, ANXA1, APCDD1, ASPA, ATP1A3, ATP2B2, CAMK1D, CCL19, CCL2, CD24, CD44, CDK1, CDK5, CELF3, CX3CL1, CXCL11, CXCL2, CXCL9, CXCR4, CYP1B1, DCLK1, DCN, DPP4, EDN1, EGR3, ELMO2, EMX2, ENC1, EPHA4, FAM89B, FEZF2, FGF9, FLRT3, FN1, FRZB, FSCN1, GJA1, GPNMB, GPR183, GRB14, GREM1, IL1A, IL1R1, IL33, INHBA, ITGB3, KDR, LAMA4, MDGA1, MET, MIF, MMP10, NDNF, …	[ACKR1, ADGRE2, AGT, ANGPT2, ANLN, ANXA1, APCDD1, ARAP3, ARHGAP18, ASPA, B4GALT1, BMP1, C3, CAMK2D, CAV1, CCDC39, CCL19, CCL2, CCL5, CD24, CD36, CD44, CD84, CDH13, CDK1, CEMIP, CITED2, CORO1A, CSF1, CSPG4, CTSH, CXCL10, CXCL11, CXCL16, CXCL8, CXCL9, CXCR4, CYP1B1, DAB2, DCC, DNAH7, EGR3, ELMO2, EMP2, ENC1, ENPP2, EPCAM, F2R, FEZF2, FGF1, FLG, GJA1, GPR183, GPR32, HIST1H2BA, HMGB2, HNF1A-AS1, ICAM…	42.0278	41.6313	47.1821
GO:0050793	regulation of developmental process	1.80899e-07	[ACKR1, ACVR1C, AGT, ANGPT2, ANGPTL4, ANXA2, APLNR, AQP1, ARAP3, ARC, AREG, ASPA, B2M, BAMBI, BDNF, BMP5, BMP6, BRINP3, C3, CARTPT, CCDC3, CCL2, CCNA2, CD109, CD38, CD44, CDR1, CHI3L1, CHRNB2, CTGF, CTSH, CX3CR1, CXCL10, CXCL8, CXCL9, CYP1B1, CYR61, DCT, DUSP6, EDNRB, EFEMP1, EFNA3, EFNB3, EGR1, EGR3, ERMN, EVI2B, F3, FCGR2A, FERMT1, FIG4, FOS, FOXP2, FSHB, FSHR, FSTL4, GFAP, GH1, GJA1, GPR183, G…	[ABR, ACKR1, ADAMTS9, ADCYAP1, ANGPTL4, ANO6, ANXA1, APLNR, APOLD1, AQP1, ASPA, BCL6, BDNF, BMP6, BRINP1, BRINP3, C6, CAMK1D, CCDC3, CCL19, CCL2, CD109, CD24, CD38, CD44, CD53, CDK1, CDK5, CHRNB2, CPNE9, CR1, CSNK1G2, CX3CL1, CXCL9, CXCR4, CYP1B1, DCN, DUSP6, EAF2, EDN1, EFNB3, EGR3, ENAM, ENC1, EPHA4, EPHB6, ETV5, EVI2B, FCGR2B, FEZF2, FGF9, FLRT3, FN1, FNDC5, FOS, FRZB, FSHR, FSTL4, GHR, GJA1, …	[ACKR1, AGT, ANGPT2, ANGPTL4, ANXA1, ANXA2, APLNR, APOLD1, AQP1, ARAP3, ARHGAP15, ARHGAP18, ASPA, B2M, B4GALT1, BDNF, BMP1, C21orf91, C3, CAV1, CCL19, CCL2, CD109, CD24, CD36, CD38, CD44, CDK1, CDR1, CHI3L1, CITED2, CORO1A, CR1, CRABP2, CSF1, CSRP1, CTH, CTSH, CTSL, CXCL10, CXCL8, CXCL9, CXCR4, CYBB, CYP1B1, DAAM2, DAB2, DCC, DKK1, EFEMP1, EFNB3, EGR3, EMP2, ENC1, ENPP2, ERMN, FCGR2A, FCGR2B, FEZ…	41.9912	46.9968	45.3282
GO:0009966	regulation of signal transduction	1.87224e-07	[ACKR1, ADH7, ADRA1B, AGT, AKAP5, AKR1C1, AKR1C2, APLNR, ARAP3, ARC, AREG, BAMBI, BDH2, BDNF, BGN, BID, BMP3, BMP5, BMP6, C3, CACNG3, CARTPT, CASP4, CCDC3, CCL2, CCL20, CCL5, CCNA2, CD109, CD177, CD44, CEP55, CHI3L1, CHN2, CRHBP, CTGF, CTSH, CX3CR1, CXCL10, CXCL11, CXCL8, CXCL9, CXXC5, CYP1B1, CYR61, DDX60, DHX58, DKK2, DOK5, DUSP19, DUSP5, DUSP6, EFEMP1, EGR1, ENDOU, EPGN, F3, FAM13B, FAS, FCGR2…	[ABR, ACKR1, ADCYAP1, AKAP5, AKR1C1, AKR1C2, AKR1C3, ANGPT1, APCDD1, APLNR, ARHGAP36, ARHGAP6, ARRDC3, ATP2B2, ATP6V1C1, BAIAP2L1, BCL6, BDNF, BGN, BMP6, BRINP1, CACNB3, CACNG3, CALB2, CCDC3, CCL19, CCL2, CD109, CD24, CD44, CDC34, CDK1, CDK5, CHGB, CHRDL1, CIB2, CNIH2, COLEC12, CX3CL1, CXCL11, CXCL2, CXCL9, CXCR4, CYP1B1, DCN, DUSP14, DUSP4, DUSP6, EDN1, ENC1, EPHA4, EPHB6, FAM89B, FCGR2B, FGF5, …	[A2M, ACKR1, AGT, AKAP5, AKR1C1, AKR1C2, APCDD1, APLNR, ARAP3, ARHGAP15, ARHGAP18, ARHGAP6, ARRDC3, AVPI1, BDNF, BMP1, C3, CACNG4, CAMK2D, CAV1, CCL19, CCL2, CCL5, CD109, CD24, CD36, CD44, CDH13, CDK1, CHGB, CHI3L1, CITED2, CMTM5, CNIH2, COLEC12, CPAMD8, CRABP2, CRHBP, CROT, CSF1, CSPG4, CTH, CTSH, CXCL10, CXCL11, CXCL16, CXCL8, CXCL9, CXCR4, CYP1B1, DAAM2, DAB2, DCC, DKK1, DLEU2, DSC1, DSC3, DUS…	43.3178	44.2443	44.7076
GO:0048513	animal organ development	1.88997e-07	[ACKR1, AEBP1, AGT, AKR1C1, ANGPT2, ANXA2, APLNR, AQP1, AREG, ARF4, ASPA, ATRX, B2M, BAG3, BAMBI, BMP3, BMP5, BMP6, BRIP1, C3, CA10, CALB1, CARTPT, CCKBR, CCL2, CCNA2, CCNB2, CD109, CD44, CERS3, CHI3L1, CHRNB2, CLEC5A, CTGF, CTSH, CX3CR1, CXCL10, CXCL8, CYP1B1, CYR61, DCT, DSP, DUSP6, EDNRA, EDNRB, EFEMP1, EGR1, EGR2, EGR3, ERO1A, ETV6, EVI2B, F3, FAS, FBXO45, FCGR2A, FERMT1, FJX1, FOS, FOXP2, FS…	[AACS, ABR, ACKR1, ADAMTS1, ADAMTS9, ADCYAP1, AEBP1, AKR1C1, AKR1C3, ANGPT1, ANO6, ANXA1, APCDD1, APLNR, AQP1, ARRDC3, ASPA, ASS1, ATP2B2, ATP6V0D1, ATP6V1C1, BCAN, BCL6, BMP6, BTG2, CCKBR, CCL19, CCL2, CD109, CD24, CD44, CDH23, CDK1, CDK5, CES1, CFH, CHRDL1, CHRNA1, CHRNB2, CLEC5A, COLEC12, CR1, CRIP2, CXCR4, CYP1B1, DCLK1, DCN, DHCR24, DSP, DUSP6, EAF2, EDN1, EGR3, EMX2, ENAM, EPHA4, EPHB6, ETV…	[ACKR1, ACTG2, ACTN2, AEBP1, AGT, AKR1C1, ALPL, ANGPT2, ANLN, ANXA1, ANXA2, APCDD1, APLNR, AQP1, ARRDC3, ASPA, B2M, B4GALT1, BCAN, BMP1, BRIP1, C21orf91, C3, CA10, CALB1, CAMK2D, CAV1, CCDC39, CCL19, CCL2, CD109, CD24, CD36, CD44, CDK1, CDX4, CERS3, CFH, CHI3L1, CITED2, CLEC4E, CLEC5A, COLEC12, CPAMD8, CR1, CRYAB, CSF1, CSPG4, CSRP1, CTSH, CTSL, CXCL10, CXCL8, CXCR4, CYP1A1, CYP1B1, DAAM2, DAB2, …	39.8053	48.506	43.7206
GO:0032940	secretion by cell	1.90617e-07	[ACVR1C, AGT, AIM2, ANXA2, ASPA, B2M, BMP6, BTN3A1, BTN3A2, BTN3A3, C3, CACNA1G, CARD17, CARTPT, CBLN4, CCL5, CD109, CD177, CD38, CD44, CHI3L1, CHRNB2, CLEC5A, CPT1A, CRHBP, CTGF, CTSH, DDX58, DSP, ENSA, F13A1, F3, FCGR2A, FERMT1, FGL2, GBP5, GJA1, GMFG, HBB, HLA-A, HMOX1, IFIH1, IL13RA2, INHBA, KCNK2, KLF5, LYZ, MMP8, MT1B, NDUFA2, NNAT, NOV, NRN1, OLR1, P2RX7, P2RY12, PFKFB2, PLA2G2A, PLAC8, PO…	[AACS, ABR, ADCYAP1, ALDH1A1, ANGPT1, ANO6, ANXA1, ASPA, ATP6V1C1, BMP6, CALB2, CBLN4, CCL19, CD109, CD38, CD44, CD53, CDK5, CHRNB2, CHRNB3, CLEC5A, CLEC9A, CPLX1, CR1, CX3CL1, DPP4, DSP, EDN1, EPHB6, EQTN, EXPH5, F13A1, F5, FCAR, FCGR2B, FN1, GJA1, HBB, HPR, HSPA1A, HTR1A, HTR2A, HTR2C, IBSP, IL17RB, IL1A, IL1R1, IL1R2, IL1RL1, IL33, ILDR2, INHBA, ITGB3, LAMTOR3, LYZ, MIF, NAPA, NDUFA2, NNAT, NO…	[A2M, ACTN2, ADGRE2, AGT, ALDOC, ANXA1, ANXA2, ANXA4, ASPA, ATP8B4, B2M, B4GALT1, BMP1, C3, CBLN4, CCL19, CCL5, CD109, CD36, CD38, CD44, CD84, CHI3L1, CLEC4E, CLEC5A, CORO1A, CPAMD8, CR1, CRHBP, CSRP1, CTSH, CTSS, CYBB, DSC1, DSC3, DSP, ENSA, ERC2, EXPH5, F13A1, F2R, FCGR2A, FCGR2B, FGL2, FLG, GBP5, GJA1, GZMK, HBB, HP, HPR, HTR2A, IL13RA2, IL1R1, ILDR2, INHBA, ITGB3, LAMP2, LYZ, MAOB, METTL7A, M…	41.7079	47.0762	48.728
GO:0016477	cell migration	2.31943e-07	[ACKR1, ACVR1C, AGT, ANGPT2, ARAP3, ARC, ARF4, BAMBI, BMP5, CCL2, CCL20, CCL5, CCNA2, CD177, CD44, CH25H, CTGF, CTSH, CUZD1, CX3CR1, CXCL10, CXCL11, CXCL8, CXCL9, CYP1B1, CYR61, DDX58, EDNRB, EGR3, F3, FBXO45, FERMT1, FSHB, GJA1, GPR183, HMOX1, ICAM1, IGFBP5, INHBA, ITGA5, JCHAIN, JUN, KDR, KLF4, KLF5, MACF1, MAG, MCAM, MDK, MET, NDN, NDNF, NET1, NOV, NOX4, NR2E1, NR4A1, NR4A2, OLR1, OPRPN, P2RY1…	[ABR, ACKR1, ADAMTS1, ADAMTS9, ADORA3, ANGPT1, ANO6, ANXA1, APCDD1, ATP1A3, CAMK1D, CCL19, CCL2, CD24, CD44, CDK1, CDK5, CX3CL1, CXCL11, CXCL2, CXCL9, CXCR4, CYP1B1, DCLK1, DCN, DPP4, EDN1, EGR3, ELMO2, EMX2, ENC1, EPHA4, FAM89B, FEZF2, FGF9, FLRT3, FN1, FRZB, FSCN1, GJA1, GPNMB, GPR183, GRB14, GREM1, IL1A, IL1R1, IL33, INHBA, ITGB3, KDR, LAMA4, MDGA1, MET, MIF, MMP10, NDNF, NELL1, NELL2, NOV, NR…	[ACKR1, ADGRE2, AGT, ANGPT2, ANLN, ANXA1, APCDD1, ARAP3, B4GALT1, BMP1, CAMK2D, CAV1, CCL19, CCL2, CCL5, CD24, CD36, CD44, CD84, CDH13, CDK1, CEMIP, CITED2, CORO1A, CSF1, CSPG4, CTSH, CXCL10, CXCL11, CXCL16, CXCL8, CXCL9, CXCR4, CYP1B1, DAB2, DCC, EGR3, ELMO2, EMP2, ENC1, ENPP2, EPCAM, F2R, FEZF2, FGF1, FLG, GJA1, GPR183, GPR32, HIST1H2BA, HMGB2, HNF1A-AS1, ICAM1, IGFBP5, IL1R1, INHBA, ITGA2, ITG…	42.1335	41.7036	47.7227
GO:0055085	transmembrane transport	2.96898e-07	[ABCA10, ABCG2, AGT, AHNAK, APLNR, AQP1, AQP9, ARC, ASPA, C3, CACNA1G, CACNG3, CATSPER2, CHRNB2, CLIC6, COX7B, CPT1A, CRHBP, CUZD1, CXCL10, CXCL11, CXCL9, EDNRA, EHD3, ERO1A, GABRA5, GABRE, GADL1, GH1, GJA1, GLRA1, GLRA2, GRIK1, GRIN2B, HOMER1, HPCA, KCNA3, KCNIP3, KCNK1, KCNK2, KCNMB2, KCNS2, MFSD4A, NET1, ODC1, ORAI2, OSTN, P2RX7, P2RY12, PCSK1, PDE2A, PLA2G2A, PNOC, PRAF2, PTGS2, PTPRC, RFC1, …	[ABCG2, ADCYAP1, AHNAK, ANO6, ANXA6, APLNR, AQP1, ASPA, ATP1A3, ATP2B2, ATP2B3, ATP6V0D1, ATP6V1C1, ATP6V1E1, AZGP1, CACNB3, CACNB4, CACNG3, CCL19, CFH, CHRNA1, CHRNB2, CHRNB3, CNIH2, COX7B, CX3CL1, CXCL11, CXCL9, EDN1, EHD3, FXYD7, GABRA1, GABRA2, GABRA3, GABRA5, GABRE, GABRG2, GABRQ, GEM, GJA1, GRIN2A, HAMP, HCN1, HCN2, HOMER1, HPCA, HTR2A, HTR2C, HTR3B, KCNE4, KCNG1, KCNG3, KCNH1, KCNIP3, KCNJ…	[ABCG2, ACTN2, AGT, AHCYL1, AHNAK, APLNR, AQP1, AQP4, AQP9, ASPA, ATP6V0D2, AZGP1, C3, CACNG4, CALHM5, CAMK2D, CAV1, CCL19, CEMIP, CFH, CNIH2, CORO1A, COX6C, CRHBP, CSPG4, CTSS, CXCL10, CXCL11, CXCL9, CYBB, DEPP1, DKK1, F2R, FKBP1A, GABRA2, GABRA5, GABRG1, GABRQ, GDA, GJA1, GLRA2, GLRA3, GRIN2B, HOMER1, HPCA, HSPA2, HTR2A, KCNAB3, KCNJ13, KCNJ16, KCNK1, KCNMB2, LRP2, MFSD1, NMUR2, ORAI2, OSTN, P2…	41.6781	46.73	47.9929
GO:0030154	cell differentiation	4.60685e-07	[ACKR1, ACVR1C, AGT, AKR1C1, AKR1C2, ANGPT2, ANGPTL4, ANOS1, ANXA2, APLNR, ARC, AREG, ARF4, ASF1A, ASPA, ATRX, B2M, BAMBI, BCHE, BDH2, BDNF, BLOC1S2, BMP3, BMP5, BMP6, BRINP3, BRIP1, C3, CARTPT, CATSPER2, CCDC3, CCL2, CCNA2, CD109, CD38, CDR1, CERS3, CHRNB2, CLEC5A, CPT1A, CTGF, CTSH, CX3CR1, CXCL10, CXCL8, CXCL9, CYR61, DCT, DOK5, DSP, DUSP6, EDNRA, EDNRB, EFEMP1, EFNA3, EFNB3, EGR1, EGR2, EGR3,…	[AACS, ACKR1, ADAMTS9, ADCYAP1, AKR1C1, AKR1C2, AKR1C3, ALDH1A1, ANGPT1, ANGPTL4, ANXA1, APCDD1, APLNR, APOLD1, ASPA, ATP2B2, BCL11A, BCL6, BDNF, BLOC1S1, BLOC1S2, BMP6, BRINP1, BRINP3, BTG2, CAMK1D, CCDC3, CCL19, CCL2, CD109, CD24, CD38, CD53, CDH23, CDHR1, CDK1, CDK5, CES1, CFH, CHRDL1, CHRNB2, CLEC5A, CPNE9, CR1, CX3CL1, CXCL9, CXCR4, DCLK1, DIAPH2, DND1, DSP, DUSP6, EDN1, EFNB3, EGR3, ELAVL4,…	[A2M, ACKR1, ACTN2, AGT, AKR1C1, AKR1C2, ALDOC, ALPL, ANGPT2, ANGPTL4, ANLN, ANXA1, ANXA2, ANXA4, APCDD1, APLNR, APOLD1, ASPA, B2M, B3GNT2, B4GALT1, BDNF, BHLHE22, BMP1, BRIP1, BTG4, C21orf91, C3, CAMK2D, CAV1, CCL19, CCL2, CCRL2, CD109, CD24, CD36, CD38, CDK1, CDR1, CDX4, CERS3, CFH, CITED2, CLEC4E, CLEC5A, CR1, CRABP2, CSF1, CSPG4, CSRP1, CTH, CTSH, CTSL, CXCL10, CXCL8, CXCL9, CXCR4, CYP1A1, DA…	40.3355	46.9634	45.4485
GO:2000026	regulation of multicellular organismal development	1.29927e-06	[ACKR1, ACVR1C, AGT, ANGPT2, ANGPTL4, APLNR, AQP1, ARC, AREG, ASPA, B2M, BAMBI, BDNF, BMP5, BMP6, BRINP3, C3, CARTPT, CCNA2, CD109, CD38, CHI3L1, CHRNB2, CTGF, CTSH, CX3CR1, CXCL10, CXCL8, CYP1B1, CYR61, DCT, DUSP6, EDNRB, EFEMP1, EFNA3, EFNB3, EGR1, EGR3, EVI2B, F3, FCGR2A, FERMT1, FIG4, FOS, FOXP2, FSHB, FSHR, FSTL4, GFAP, GJA1, GPR183, GRHL2, HIST1H3I, HIST1H4B, HIST1H4C, HIST1H4D, HLA-G, HMOX…	[ACKR1, ADAMTS9, ADCYAP1, ANGPTL4, ANO6, ANXA1, APLNR, APOLD1, AQP1, ASPA, BCL6, BDNF, BMP6, BRINP1, BRINP3, C6, CAMK1D, CCL19, CD109, CD24, CD38, CDK1, CDK5, CHRNB2, CPNE9, CR1, CX3CL1, CXCR4, CYP1B1, DCN, DUSP6, EAF2, EDN1, EFNB3, EGR3, ENAM, ENC1, EPHA4, EPHB6, ETV5, EVI2B, FCGR2B, FEZF2, FGF9, FLRT3, FN1, FOS, FRZB, FSHR, FSTL4, GJA1, GPNMB, GPR183, GREM1, H3F3B, HAMP, HIST1H3B, HIST1H3F, HIS…	[ACKR1, AGT, ANGPT2, ANGPTL4, ANXA1, APLNR, APOLD1, AQP1, ASPA, B2M, B4GALT1, BDNF, BMP1, C21orf91, C3, CAV1, CCL19, CD109, CD24, CD38, CDK1, CHI3L1, CITED2, CR1, CRABP2, CSF1, CTH, CTSH, CTSL, CXCL10, CXCL8, CXCR4, CYBB, CYP1B1, DAAM2, DAB2, DCC, DKK1, EFEMP1, EFNB3, EGR3, EMP2, ENC1, ENPP2, FCGR2A, FCGR2B, FEZF2, FGF1, FLG, FSHR, GFAP, GJA1, GPR183, H3F3B, HIST1H3E, HMGB2, HSPB6, IL18, IL1R1, I…	43.1144	46.939	42.7667
GO:0050794	regulation of cellular process	2.03723e-06	[A2ML1, ACADL, ACKR1, ACVR1C, ADGRA3, ADH7, ADRA1B, AEBP1, AGT, AHNAK, AIM2, AKAP5, AKR1C1, AKR1C2, ANGPT2, ANGPTL4, ANOS1, ANXA2, APBB1IP, APLNR, APOC1, AQP1, ARAP3, ARC, AREG, ARF4, ASF1A, ASPA, ATRX, B2M, BAG3, BAMBI, BCHE, BDH2, BDNF, BGN, BID, BLOC1S2, BMP3, BMP5, BMP6, BRCC3, BRINP3, BRIP1, BTBD11, BTN3A1, BTN3A3, C3, CA11, CACNA1G, CACNG3, CALB1, CAMLG, CARD17, CARTPT, CASP4, CCDC3, CCKBR,…	[A2ML1, AACS, ABR, ACKR1, ADAMTS1, ADAMTS9, ADAP1, ADCYAP1, ADGRA3, ADGRE1, ADORA3, AEBP1, AHNAK, AKAP5, AKR1C1, AKR1C2, AKR1C3, ANGPT1, ANGPTL4, ANO6, ANXA1, ANXA6, APCDD1, APLNR, APOLD1, AQP1, ARHGAP36, ARHGAP6, ARRDC3, ARRDC4, ASB17, ASPA, ASS1, ATP1A3, ATP2B2, ATP6V0D1, ATP6V1C1, ATP6V1E1, AZGP1, BAIAP2L1, BCL11A, BCL6, BDNF, BGN, BLOC1S2, BMP6, BRINP1, BRINP3, BSN, BTG2, C6, CA1, CACNB3, CAC…	[A2M, A2ML1, ACKR1, ACTG2, ACTN2, ADGRA3, ADGRE1, ADGRE2, AEBP1, AGT, AHCYL1, AHNAK, AKAP5, AKR1C1, AKR1C2, ANGPT2, ANGPTL4, ANLN, ANXA1, ANXA2, ANXA4, APCDD1, APLNR, APOC1, APOLD1, AQP1, ARAP3, ARHGAP15, ARHGAP18, ARHGAP6, ARRDC3, ARRDC4, ASB17, ASPA, ATP6V0D2, AVPI1, AZGP1, B2M, B4GALT1, BDNF, BHLHE22, BMP1, BRIP1, BTG4, C1QL3, C21orf91, C3, CACNG4, CALB1, CAMK2D, CAV1, CCDC39, CCL19, CCL2, CCL…	43.6129	45.0086	42.5662
GO:0009967	positive regulation of signal transduction	2.45468e-06	[ADRA1B, AGT, AKR1C1, AKR1C2, ARC, AREG, BAMBI, BDNF, BID, BMP3, BMP5, BMP6, C3, CACNG3, CARTPT, CASP4, CCL2, CCL20, CCL5, CCNA2, CD44, CHI3L1, CHN2, CTGF, CTSH, CX3CR1, CXCL10, CXCL11, CXCL9, CXXC5, CYP1B1, CYR61, DDX60, DHX58, DKK2, DOK5, DUSP19, DUSP5, DUSP6, EPGN, F3, FAS, FCGR2A, FERMT1, FSHR, GADD45A, GH1, GJA1, GPR183, GPR65, GSKIP, GZMB, HMOX1, HOMER1, ICAM1, IGFBP5, IGFBP7, IGSF9B, INHBA…	[ADCYAP1, AKR1C1, AKR1C2, AKR1C3, ANGPT1, ARHGAP6, ATP6V1C1, BDNF, BMP6, BRINP1, CACNB3, CACNG3, CCL19, CCL2, CD24, CD44, CDK1, CIB2, COLEC12, CX3CL1, CXCL11, CXCL9, CXCR4, CYP1B1, DCN, DUSP6, EDN1, EPHA4, EPHB6, FCGR2B, FGF5, FGF9, FSHR, GHR, GJA1, GPNMB, GPR183, GRB14, GREM1, HOMER1, HSPA1A, HTR2A, HTR2C, IGSF9B, IL18, IL1R1, INHBA, ITGB3, KCNK1, KDR, KL, LAMTOR3, LY96, MAPK8IP1, MAS1, MET, MIF…	[AGT, AKR1C1, AKR1C2, ARHGAP6, AVPI1, BDNF, C3, CACNG4, CAMK2D, CAV1, CCL19, CCL2, CCL5, CD24, CD36, CD44, CDH13, CDK1, CHI3L1, CITED2, COLEC12, CROT, CSF1, CSPG4, CTH, CTSH, CXCL10, CXCL11, CXCL9, CXCR4, CYP1B1, DAAM2, DAB2, DKK1, DLEU2, EMP2, F2R, FAS, FCGR2A, FCGR2B, FGF1, FKBP1A, FLG, FRAT1, FSHR, GJA1, GPR17, GPR183, GPR37, GPR65, HOMER1, HTR2A, ICAM1, IGFBP5, IGFBP7, IGSF9B, IL18, IL1R1, IN…	45.0152	41.7413	45.4244
GO:0048518	positive regulation of biological process	2.68149e-06	[ACADL, ACKR1, ACVR1C, ADRA1B, AGT, AIM2, AKAP5, AKR1C1, AKR1C2, ANGPT2, ANGPTL4, ANXA2, APBB1IP, APLNR, APOC1, AQP1, ARC, AREG, ARF4, ASF1A, ASPA, ATRX, B2M, BAG3, BAMBI, BCHE, BDNF, BID, BMP3, BMP5, BMP6, BRCC3, BRINP3, BRIP1, BTN3A1, C1S, C3, CA11, CACNA1G, CACNG3, CALB1, CARTPT, CASP4, CCDC3, CCKBR, CCL2, CCL20, CCL5, CCNA2, CD177, CD38, CD44, CHI3L1, CHN2, CHRNB2, CKS2, CLEC5A, CPT1A, CSRNP2…	[AACS, ABI3BP, ABR, ACKR1, ADAMTS1, ADAMTS9, ADCYAP1, AKAP5, AKR1C1, AKR1C2, AKR1C3, ANGPT1, ANGPTL4, ANO6, ANXA1, APLNR, AQP1, ARHGAP6, ARRDC3, ARRDC4, ASPA, ASS1, ATP1A3, ATP2B2, ATP6V1C1, BAIAP2L1, BCL6, BDNF, BMP6, BRINP1, BRINP3, BTG2, C6, C7, CACNB3, CACNG3, CALB2, CAMK1D, CCDC3, CCKBR, CCL19, CCL2, CCNC, CD24, CD38, CD44, CD53, CDC34, CDK1, CDK5, CELF3, CES1, CFH, CHRNB2, CIB2, CIP2A, CIRB…	[A2M, ACKR1, ACTG2, ACTN2, ADGRE2, AGT, AHCYL1, AKAP5, AKR1C1, AKR1C2, ANGPT2, ANGPTL4, ANLN, ANXA1, ANXA2, APLNR, APOC1, AQP1, ARHGAP6, ARRDC3, ARRDC4, ASPA, AVPI1, B2M, B4GALT1, BDNF, BMP1, BRIP1, C1S, C21orf91, C3, C7, CACNG4, CALB1, CAMK2D, CAV1, CCL19, CCL2, CCL5, CD24, CD36, CD38, CD44, CD84, CDH13, CDK1, CDX4, CEMIP, CFH, CFI, CHI3L1, CITED2, CLEC4E, CLEC5A, COLEC12, CORO1A, CPAMD8, CR1, C…	44.2989	45.0157	44.0121
GO:0048583	regulation of response to stimulus	5.40742e-06	[ACKR1, ADH7, ADRA1B, AGT, AIM2, AKAP5, AKR1C1, AKR1C2, ANGPT2, ANXA2, AOAH, APLNR, ARAP3, ARC, AREG, ASPA, B2M, BAG3, BAMBI, BDH2, BDNF, BGN, BID, BMP3, BMP5, BMP6, BRCC3, BTN3A1, C1S, C3, CACNG3, CARTPT, CASP4, CCDC3, CCL2, CCL20, CCL5, CCNA2, CD109, CD177, CD38, CD44, CEP55, CHI3L1, CHN2, CHRNB2, CRHBP, CTGF, CTSH, CX3CR1, CXCL10, CXCL11, CXCL8, CXCL9, CXXC5, CYP1B1, CYR61, DDX58, DDX60, DHX58…	[ABR, ACKR1, ADCYAP1, AKAP5, AKR1C1, AKR1C2, AKR1C3, ANGPT1, ANO6, ANXA1, AOAH, APCDD1, APLNR, ARHGAP36, ARHGAP6, ARRDC3, ASPA, ATP2B2, ATP6V1C1, BAIAP2L1, BCL6, BDNF, BGN, BMP6, BRINP1, BTG2, C6, C7, CACNB3, CACNG3, CALB2, CAMK1D, CCDC3, CCL19, CCL2, CD109, CD24, CD38, CD44, CDC34, CDK1, CDK5, CFH, CHGB, CHRDL1, CHRNB2, CIB2, CNIH2, COLEC12, CR1, CX3CL1, CXCL11, CXCL2, CXCL9, CXCR4, CYP1B1, DCN,…	[A2M, ACKR1, ADGRE2, AGT, AKAP5, AKR1C1, AKR1C2, ANGPT2, ANXA1, ANXA2, APCDD1, APLNR, ARAP3, ARHGAP15, ARHGAP18, ARHGAP6, ARRDC3, ASPA, AVPI1, B2M, BDNF, BMP1, C1S, C3, C7, CACNG4, CAMK2D, CAV1, CCL19, CCL2, CCL5, CD109, CD24, CD36, CD38, CD44, CD84, CDH13, CDK1, CFH, CFI, CHGB, CHI3L1, CITED2, CLEC2B, CLEC4E, CMTM5, CNIH2, COLEC12, CPAMD8, CR1, CRABP2, CRHBP, CROT, CRYAB, CSF1, CSPG4, CTH, CTSH,…	44.4802	43.9123	46.1836
GO:0007399	nervous system development	5.70328e-06	[ACKR1, AGT, ANOS1, AQP1, ARC, AREG, ARF4, ASPA, ATRX, B2M, BAG3, BCHE, BDNF, BLOC1S2, BMP5, BMP6, BRINP3, C3, CA10, CCL2, CD38, CHRNB2, COX7B, CX3CR1, CXCL8, CYR61, DCT, DOK5, EDNRA, EDNRB, EFNA3, EFNB3, EGR2, EGR3, ETV6, FBXO45, FCGR2A, FIG4, FOS, FOXP2, FSHR, FSTL4, GABRA5, GFAP, GFRA2, GJA1, GPR183, GRHL2, GRIK1, GRIN2B, HPCA, IGSF9B, IL1RAPL2, INHBA, ISLR2, JUN, KCNK1, KDM7A, KLF4, LDLR, LGI…	[ABR, ACKR1, ADAM23, ADCYAP1, ANXA1, APCDD1, AQP1, ASPA, ATP2B2, ATP6V0D1, ATP6V1C1, BCAN, BCL11A, BCL6, BDNF, BLOC1S1, BLOC1S2, BMP6, BRINP1, BRINP3, BSN, BTG2, CAMK1D, CCL2, CD38, CDH23, CDHR1, CDK1, CDK5, CES1, CHRDL1, CHRNB2, CNTN5, COLEC12, COX7B, CPNE9, CX3CL1, CXCR4, DCLK1, EFNB3, EGR3, ELAVL4, EMX2, ENC1, EPHA4, ETV5, FAM126A, FCGR2B, FEZF2, FGF5, FGF9, FLRT3, FN1, FOS, FRZB, FSHR, FSTL4,…	[ACKR1, AGT, ANXA1, APCDD1, AQP1, ASPA, B2M, B3GNT2, BCAN, BDNF, BHLHE22, BTG4, C21orf91, C3, CA10, CAMK2D, CCL2, CD38, CDH9, CDK1, CITED2, CNTN5, COLEC12, CRABP2, CSF1, CSPG4, CXCL8, CXCR4, DAAM2, DCC, DKK1, DSC1, DSC3, EFNB3, EGR2, EGR3, ENC1, FABP7, FCGR2A, FCGR2B, FEZF2, FLG, FMN1, FSHR, GABRA5, GBP3, GDA, GFAP, GJA1, GPR183, GRIN2B, HMGB2, HPCA, ID3, IGSF9B, INHBA, ISLR2, ITM2A, KCNK1, KIRRE…	36.7998	50.7898	43.7948
GO:0042127	regulation of cell proliferation	7.25689e-06	[ACKR1, ACVR1C, AGT, AKR1C1, AKR1C2, ANXA2, APLNR, AQP1, AREG, BAMBI, BCHE, BID, BMP5, BMP6, BRIP1, CA11, CCKBR, CCL2, CCL5, CCNA2, CD109, CD38, CHRNB2, CTGF, CTSH, CX3CR1, CXCL10, CXCL11, CXCL8, CXCL9, CYP1B1, CYR61, DCT, EDNRB, EGR1, EGR3, EGR4, EPGN, F3, FABP3, FAS, FCGR2A, FERMT1, FOXP2, FSHB, GFAP, GJA1, GJB6, GLP2R, GPR183, HLA-A, HLA-DMB, HLA-DPA1, HLA-G, HMOX1, IFIT3, IFT74, IGFBP5, IGFBP…	[ACKR1, ADAMTS1, ADCYAP1, ADORA3, AKR1C1, AKR1C2, AKR1C3, ANGPT1, ANXA1, APLNR, AQP1, AZGP1, BCL6, BMP6, BTG2, CALB2, CCKBR, CCL19, CCL2, CD109, CD24, CD38, CDK1, CHRNB2, CIB2, CIP2A, CRIP2, CX3CL1, CXCL11, CXCL2, CXCL9, CYP1B1, DHCR24, DPP4, EAF2, EDN1, EGR3, EMP3, EPHB6, ETV5, FABP3, FCGR2B, FEZF2, FGF5, FGF9, FN1, FRZB, GJA1, GLP2R, GPNMB, GPR183, GREM1, HLA-DPA1, HLA-DPB1, HSPA1A, HTR1A, HTR2…	[ACKR1, AGT, AKR1C1, AKR1C2, ANXA1, ANXA2, APLNR, AQP1, AZGP1, B4GALT1, BMP1, BRIP1, BTG4, CAMK2D, CAV1, CCL19, CCL2, CCL5, CD109, CD24, CD38, CDH13, CDK1, CITED2, CORO1A, CPAMD8, CSF1, CTSH, CXCL10, CXCL11, CXCL8, CXCL9, CYP1B1, EGR3, EMP2, EPCAM, F2R, FABP3, FABP7, FAS, FCGR2A, FCGR2B, FEZF2, FGF1, FLG, GFAP, GJA1, GJB6, GLP2R, GPR183, HILPDA, HIST1H2AE, HLA-DMB, HLA-DPA1, HLA-DPB1, HMGB2, HPSE…	45.5307	45.5307	46.3157
GO:0045595	regulation of cell differentiation	9.15852e-06	[ACKR1, AGT, ARC, AREG, ASPA, B2M, BAMBI, BDNF, BMP5, BMP6, BRINP3, C3, CARTPT, CCDC3, CCNA2, CD109, CD38, CDR1, CHRNB2, CTGF, CX3CR1, CXCL10, CXCL9, CYR61, DCT, DUSP6, EDNRB, EFEMP1, EFNB3, EGR3, EVI2B, FCGR2A, FIG4, FOS, FSHB, FSHR, FSTL4, GFAP, GJA1, GPR183, GRHL2, HDAC8, HIST1H3I, HIST1H4B, HIST1H4C, HIST1H4D, HLA-G, IGFBP5, IL34, INHBA, IRF1, ISLR2, ITPKB, JUN, KDR, KLF10, KLF4, KLF5, LDLR, …	[ACKR1, ADAMTS9, ADCYAP1, ANXA1, APOLD1, ASPA, BCL6, BDNF, BMP6, BRINP1, BRINP3, CAMK1D, CCDC3, CCL19, CD109, CD24, CD38, CD53, CDK1, CDK5, CHRNB2, CPNE9, CR1, CX3CL1, CXCL9, CXCR4, DUSP6, EDN1, EFNB3, EGR3, ENC1, EPHA4, ETV5, EVI2B, FCGR2B, FEZF2, FGF9, FN1, FNDC5, FOS, FRZB, FSHR, FSTL4, GHR, GJA1, GPR183, GREM1, H3F3B, HAMP, HIST1H3B, HIST1H3F, HIST1H4B, HIST1H4C, HIST1H4D, HOPX, HSPA1A, HTR2A…	[ACKR1, AGT, ANXA1, APOLD1, ASPA, B2M, BDNF, C21orf91, C3, CAV1, CCL19, CD109, CD24, CD36, CD38, CDK1, CDR1, CITED2, CR1, CRABP2, CSF1, CSRP1, CTH, CTSL, CXCL10, CXCL9, CXCR4, DAAM2, DAB2, DCC, DKK1, EFEMP1, EFNB3, EGR3, EMP2, ENC1, FCGR2A, FCGR2B, FEZF2, FLG, FSHR, GDPD2, GFAP, GJA1, GPR183, H3F3B, HIST1H3E, HMGB2, HTR2A, ID3, IGFBP5, IL18, IL34, INHBA, ISLR2, ITGB3, ITPKB, JUNB, KLK6, LINGO1, L…	41.2302	48.9368	45.8541
GO:0048522	positive regulation of cellular process	1.27328e-05	[ACKR1, ACVR1C, ADRA1B, AGT, AIM2, AKR1C1, AKR1C2, ANGPTL4, ANXA2, APLNR, APOC1, AQP1, ARC, AREG, ARF4, ASF1A, ASPA, ATRX, B2M, BAMBI, BCHE, BDNF, BID, BMP3, BMP5, BMP6, BRCC3, BRINP3, BRIP1, C3, CA11, CACNA1G, CACNG3, CALB1, CARTPT, CASP4, CCDC3, CCKBR, CCL2, CCL20, CCL5, CCNA2, CD177, CD38, CD44, CHI3L1, CHN2, CHRNB2, CKS2, CLEC5A, CPT1A, CSRNP2, CTGF, CTSH, CUZD1, CX3CR1, CXCL10, CXCL11, CXCL8…	[AACS, ABR, ACKR1, ADAMTS1, ADAMTS9, ADCYAP1, AKR1C1, AKR1C2, AKR1C3, ANGPT1, ANGPTL4, ANO6, ANXA1, APLNR, AQP1, ARHGAP6, ARRDC3, ARRDC4, ASPA, ASS1, ATP2B2, ATP6V1C1, BAIAP2L1, BCL6, BDNF, BMP6, BRINP1, BRINP3, BTG2, C6, CACNB3, CACNG3, CALB2, CAMK1D, CCDC3, CCKBR, CCL19, CCL2, CCNC, CD24, CD38, CD44, CD53, CDC34, CDK1, CDK5, CELF3, CES1, CHRNB2, CIB2, CIP2A, CIRBP, CLEC5A, CLEC9A, COLEC12, CPNE…	[ACKR1, ACTG2, ACTN2, AGT, AKR1C1, AKR1C2, ANGPTL4, ANLN, ANXA1, ANXA2, APLNR, APOC1, AQP1, ARHGAP6, ARRDC3, ARRDC4, ASPA, AVPI1, B2M, B4GALT1, BDNF, BRIP1, C21orf91, C3, CACNG4, CALB1, CAMK2D, CAV1, CCL19, CCL2, CCL5, CD24, CD36, CD38, CD44, CDH13, CDK1, CDX4, CEMIP, CHI3L1, CITED2, CLEC4E, CLEC5A, COLEC12, CORO1A, CPAMD8, CR1, CRABP2, CROT, CSF1, CSPG4, CSRP1, CTH, CTSH, CXCL10, CXCL11, CXCL16,…	44.8309	45.6343	42.742
GO:0035556	intracellular signal transduction	1.73776e-05	[ADRA1B, AGT, AKAP5, AKR1C1, AKR1C2, APLNR, AQP1, ARAP3, ARC, AREG, ATRX, BDH2, BGN, BID, BMP3, BMP5, BMP6, BRCC3, CARTPT, CASP4, CCL2, CCL20, CCL5, CCNA2, CD44, CEP55, CHI3L1, CHML, CHN2, CTGF, CTSH, CUZD1, CX3CR1, CXCL10, CXCL11, CXCL8, CXCL9, CXXC5, CYP1B1, CYR61, DDX58, DDX60, DHX58, DOK5, DRD5, DUSP19, DUSP5, DUSP6, EDNRB, EPGN, ERO1A, F3, FAM13B, FAS, FCGR2A, FSHR, GADD45A, GBA, GFRA2, GH1,…	[ABR, ADCYAP1, AKAP5, AKR1C1, AKR1C2, AKR1C3, ANGPT1, APLNR, AQP1, ARHGAP36, ARHGAP6, ARRDC3, ASB17, ATP2B2, BCL6, BGN, BMP6, BRINP1, BTG2, CAMK1D, CAMK1G, CCL19, CCL2, CD24, CD44, CDC34, CDK1, CDK5, CHML, COLEC12, CRIP2, CX3CL1, CXCL11, CXCL9, CXCR4, CYP1B1, DCLK1, DCN, DEPDC1, DHCR24, DUSP14, DUSP4, DUSP6, EDN1, EPHA4, EPHB6, FCGR2B, FGF5, FGF9, FIBIN, FLRT3, FN1, FSHR, GBA, GFRA2, GHR, GJA1, G…	[A2M, ACTN2, AGT, AKAP5, AKR1C1, AKR1C2, APLNR, AQP1, ARAP3, ARHGAP15, ARHGAP18, ARHGAP6, ARRDC3, ASB17, AVPI1, CAMK2D, CAV1, CCL19, CCL2, CCL5, CD24, CD36, CD44, CDH13, CDK1, CHI3L1, COLEC12, CPAMD8, CROT, CRYAB, CSF1, CSPG4, CSRP1, CTH, CTSH, CXCL10, CXCL11, CXCL8, CXCL9, CXCR4, CYP1B1, DEPDC1, DKK1, DLEU2, DSC1, DSC3, DUSP4, F2R, FAS, FCGR2A, FCGR2B, FGF1, FIBIN, FKBP1A, FLG, FSHR, GJA1, GNG2,…	42.206	46.835	41.9337
GO:1902531	regulation of intracellular signal transduction	1.74259e-05	[ADRA1B, AGT, AKAP5, AKR1C1, AKR1C2, APLNR, ARAP3, ARC, AREG, BDH2, BGN, BID, BMP3, BMP5, BMP6, CARTPT, CCL2, CCL20, CCL5, CCNA2, CD44, CEP55, CHI3L1, CHN2, CTGF, CX3CR1, CXCL10, CXCL11, CXCL9, CXXC5, CYP1B1, CYR61, DDX60, DHX58, DOK5, DUSP19, DUSP5, DUSP6, EPGN, F3, FAM13B, FAS, FCGR2A, FSHR, GADD45A, GBA, GFRA2, GH1, GJA1, GPR183, GPR65, HMOX1, ICAM1, IGFBP5, IGFBP7, INHBA, ITPKB, JUN, KCNK1, K…	[ABR, ADCYAP1, AKAP5, AKR1C1, AKR1C2, AKR1C3, ANGPT1, APLNR, ARHGAP36, ARHGAP6, ARRDC3, ATP2B2, BCL6, BGN, BMP6, BRINP1, CCL19, CCL2, CD24, CD44, CDC34, CDK1, CDK5, COLEC12, CX3CL1, CXCL11, CXCL9, CXCR4, CYP1B1, DCN, DUSP14, DUSP4, DUSP6, EDN1, EPHA4, EPHB6, FCGR2B, FGF5, FGF9, FLRT3, FN1, FSHR, GBA, GFRA2, GHR, GJA1, GPNMB, GPR183, GREM1, HSPA1A, HTR2A, HTR2C, IL18, IL1RL1, INHBA, IRAK3, KCNK1, …	[A2M, AGT, AKAP5, AKR1C1, AKR1C2, APLNR, ARAP3, ARHGAP15, ARHGAP18, ARHGAP6, ARRDC3, AVPI1, CAMK2D, CAV1, CCL19, CCL2, CCL5, CD24, CD36, CD44, CDH13, CDK1, CHI3L1, COLEC12, CROT, CSF1, CSPG4, CTH, CXCL10, CXCL11, CXCL9, CXCR4, CYP1B1, DKK1, DLEU2, DSC1, DSC3, DUSP4, F2R, FAS, FCGR2A, FCGR2B, FGF1, FKBP1A, FLG, FSHR, GJA1, GPR17, GPR183, GPR37, GPR65, HTR2A, ICAM1, IGFBP5, IGFBP7, IL18, INHBA, ITP…	42.9797	43.7144	44.4491
GO:0019220	regulation of phosphate metabolic process	1.93346e-05	[ADRA1B, AGT, ANXA2, APLNR, APOC1, AREG, ASPA, BDNF, BGN, BMP3, BMP5, BMP6, C3, CARTPT, CCKBR, CCL2, CCL20, CCL5, CCNA2, CD109, CD44, CHI3L1, CKS2, CSRNP2, CTGF, CX3CR1, CXCL10, CYR61, DOK5, DUSP19, DUSP5, DUSP6, EDNRB, EGR1, ENSA, EPGN, F3, FABP3, FABP4, FAS, FCGR2A, FSHR, GADD45A, GBA, GFRA2, GH1, GJA1, GMFG, GPR183, GSKIP, GUCA1C, HPCA, ICAM1, IL34, INHBA, ITGA5, ITPKB, JUN, KCNK1, KDR, KLF4, …	[ADCYAP1, ANGPT1, APLNR, ASPA, ATP2B2, BDNF, BGN, BMP6, CCKBR, CCL19, CCL2, CCNC, CD109, CD24, CD44, CDK1, CDK5, CIB2, COLEC12, CX3CL1, CXCR4, DCN, DUSP14, DUSP4, DUSP6, EDN1, EPHA4, FABP3, FAM20A, FCGR2B, FGF9, FLRT3, FN1, FSHR, GBA, GFRA2, GHR, GJA1, GPNMB, GPR183, GREM1, GUCA1C, HPCA, HTR2A, HTR2C, IL18, INHBA, IRAK3, ITGB3, KCNK1, KDR, KL, LAMTOR3, LIMK2, LRRC4B, LRRTM1, MAPK8IP1, MAS1, MIF, …	[AGT, ANXA2, APLNR, APOC1, ASPA, AVPI1, BDNF, C3, CAMK2D, CAV1, CCL19, CCL2, CCL5, CD109, CD24, CD36, CD44, CDK1, CEMIP, CHI3L1, COLEC12, CROT, CSF1, CSPG4, CXCL10, CXCR4, DAB2, DKK1, DSC1, DSC3, DUSP4, EMP2, ENPP2, ENSA, F2R, FABP3, FAS, FCGR2A, FCGR2B, FGF1, FKBP1A, FLG, FSHR, GJA1, GPR183, GPR37, HPCA, HSPA2, HTR2A, ICAM1, IL18, IL34, INHBA, ITGA2, ITGB3, ITPKB, KCNK1, LPAR3, MMD, MMD2, MPEG1,…	43.3023	44.0825	43.3023
GO:0048584	positive regulation of response to stimulus	2.75118e-05	[ADRA1B, AGT, AIM2, AKR1C1, AKR1C2, ARC, AREG, B2M, BAMBI, BDNF, BID, BMP3, BMP5, BMP6, BRCC3, BTN3A1, C1S, C3, CACNG3, CARTPT, CASP4, CCL2, CCL20, CCL5, CCNA2, CD177, CD38, CD44, CHI3L1, CHN2, CHRNB2, CTGF, CTSH, CX3CR1, CXCL10, CXCL11, CXCL8, CXCL9, CXXC5, CYP1B1, CYR61, DDX58, DDX60, DHX58, DKK2, DOK5, DUSP19, DUSP5, DUSP6, EPGN, F3, FABP4, FAS, FCGR2A, FERMT1, FSHR, GADD45A, GBP5, GH1, GJA1, …	[ADCYAP1, AKR1C1, AKR1C2, AKR1C3, ANGPT1, ANO6, ANXA1, ARHGAP6, ATP6V1C1, BDNF, BMP6, BRINP1, BTG2, C6, C7, CACNB3, CACNG3, CALB2, CAMK1D, CCL19, CCL2, CD24, CD38, CD44, CDK1, CFH, CHRNB2, CIB2, COLEC12, CR1, CX3CL1, CXCL11, CXCL2, CXCL9, CXCR4, CYP1B1, DCN, DUSP6, EDN1, ELMO2, EPHA4, EPHB6, FCGR2B, FGF5, FGF9, FSHR, GHR, GJA1, GPNMB, GPR183, GRB14, GREM1, HLA-DPA1, HLA-DPB1, HLA-DQA1, HLA-DRA, H…	[A2M, AGT, AKR1C1, AKR1C2, ANXA1, ARHGAP6, AVPI1, B2M, BDNF, C1S, C3, C7, CACNG4, CAMK2D, CAV1, CCL19, CCL2, CCL5, CD24, CD36, CD38, CD44, CDH13, CDK1, CFH, CFI, CHI3L1, CITED2, CLEC4E, COLEC12, CR1, CROT, CSF1, CSPG4, CTH, CTSH, CTSS, CXCL10, CXCL11, CXCL8, CXCL9, CXCR4, CYP1B1, DAAM2, DAB2, DKK1, DLEU2, ELMO2, EMP2, F2R, FAS, FCGR2A, FCGR2B, FGF1, FKBP1A, FLG, FRAT1, FSHR, GBP5, GJA1, GPR17, GP…	45.8217	43.3614	45.5141
GO:0006810	transport	6.27266e-05	[ABCA10, ABCG2, ACKR1, ACVR1C, AGT, AHNAK, AIM2, AKAP5, AKR1C1, ANGPT2, ANXA2, AP1S1, APLNR, APOC1, APOL6, AQP1, AQP9, ARAP3, ARC, AREG, ARF4, ARV1, ASPA, B2M, BAG3, BID, BLOC1S2, BMP6, BTN3A1, BTN3A2, BTN3A3, C3, CA12, CACNA1G, CACNG3, CARD17, CARTPT, CATSPER2, CBLN4, CCKBR, CCL2, CCL5, CD109, CD177, CD38, CD44, CHI3L1, CHML, CHRNB2, CLEC5A, CLIC6, COX7B, CP, CPT1A, CRHBP, CTGF, CTSH, CUZD1, CX3…	[AACS, ABCG2, ABR, ACKR1, ADAMTS9, ADCYAP1, AHNAK, AKAP5, AKR1C1, AKR1C3, ALDH1A1, ANGPT1, ANO6, ANXA1, ANXA6, AP1S1, APLNR, APOLD1, AQP1, ARRDC4, ASPA, ATP1A3, ATP2B2, ATP2B3, ATP6V0D1, ATP6V1C1, ATP6V1E1, AZGP1, BCL6, BLOC1S1, BLOC1S2, BMP6, BSN, CA1, CA12, CACNB3, CACNB4, CACNG3, CALB2, CAMK1D, CBLN4, CCKBR, CCL19, CCL2, CD109, CD163, CD24, CD38, CD44, CD53, CDH23, CDK1, CDK5, CES1, CFH, CHML,…	[A2M, ABCG2, ACKR1, ACTN2, ADGRE2, AGT, AHCYL1, AHNAK, AKAP5, AKR1B10, AKR1C1, ALDOC, ANGPT2, ANXA1, ANXA2, ANXA4, AP1S1, APLNR, APOC1, APOLD1, AQP1, AQP4, AQP9, ARAP3, ARRDC4, ASPA, ATP6V0D2, ATP8B4, AZGP1, B2M, B4GALT1, BMP1, C3, CA12, CA3, CACNG4, CALHM5, CAMK2D, CAV1, CBLN4, CCL19, CCL2, CCL5, CCRL2, CD109, CD163, CD24, CD36, CD38, CD44, CD84, CDH13, CDK1, CEMIP, CFH, CFI, CHI3L1, CLEC4E, CLE…	40.3919	47.6459	47.6459
GO:0048519	negative regulation of biological process	0.000128263	[A2ML1, ACADL, ACKR1, ACVR1C, ADH7, AEBP1, AGT, AIM2, AKR1C1, ANGPT2, ANGPTL4, ANOS1, ANXA2, AOAH, APLNR, APOC1, AQP1, ARAP3, ARC, AREG, ARF4, ASF1A, ASPA, ATRX, B2M, BAG3, BAMBI, BCHE, BDNF, BGN, BID, BMP5, BMP6, BRCC3, BRINP3, BRIP1, C3, CARD17, CARTPT, CCDC3, CCL2, CCL5, CCNA2, CD109, CD38, CD44, CDR1, CHRNB2, CLEC5A, CRHBP, CSRNP2, CTGF, CTSH, CUZD1, CX3CR1, CXCL10, CXCL11, CXCL8, CXCL9, CXXC…	[A2ML1, ABR, ACKR1, ADAMTS1, ADAMTS9, ADCYAP1, ADORA3, AEBP1, AKR1C1, AKR1C3, ALDH1A1, ANGPT1, ANGPTL4, ANXA1, AOAH, APCDD1, APLNR, AQP1, ARHGAP6, ARRDC3, ASPA, ASS1, ATP1A3, ATP2B2, AZGP1, BCL11A, BCL6, BDNF, BGN, BMP6, BRINP1, BRINP3, BTG2, CACNB3, CALB2, CAMK1D, CCDC3, CCL19, CCL2, CD109, CD24, CD38, CD44, CDC34, CDK1, CDK5, CES1, CFH, CHRDL1, CHRNB2, CIB2, CIRBP, CLEC5A, CNIH2, COLEC12, CR1, …	[A2M, A2ML1, ACKR1, ACTN2, AEBP1, AGT, AKR1C1, ALDOC, ANGPT2, ANGPTL4, ANXA1, ANXA2, ANXA4, APCDD1, APLNR, APOC1, AQP1, ARAP3, ARHGAP6, ARRDC3, ASPA, AZGP1, B2M, B4GALT1, BDNF, BMP1, BRIP1, BTG4, C3, CAMK2D, CAV1, CCL19, CCL2, CCL5, CD109, CD24, CD36, CD38, CD44, CD84, CDH13, CDK1, CDR1, CDX4, CEMIP, CFH, CITED2, CLEC5A, CNIH2, COLEC12, CORO1A, CPAMD8, CR1, CRHBP, CRYAB, CSPG4, CSRP1, CTH, CTSH, …	42.6873	45.4361	45.4361
GO:0022008	neurogenesis	0.000272736	[AGT, ANOS1, ARC, AREG, ARF4, ASPA, B2M, BCHE, BDNF, BLOC1S2, BMP5, BMP6, BRINP3, C3, CCL2, CD38, CHRNB2, CX3CR1, DCT, DOK5, EDNRB, EFNA3, EFNB3, EGR2, ETV6, FBXO45, FIG4, FSHR, FSTL4, GABRA5, GFAP, GFRA2, GJA1, GPR183, INHBA, ISLR2, JUN, KLF4, LDLR, LGI1, LINGO1, MACF1, MAG, MMD, MT1A, NCDN, NDN, NDNF, NNAT, NOV, NR2E1, NR4A2, NRN1, OSTN, P2RY12, PCSK1, PLXNA4, PROM1, PRTG, RASAL1, RIT2, RNASE1,…	[ADCYAP1, ANXA1, APCDD1, ASPA, ATP2B2, BCL11A, BCL6, BDNF, BLOC1S1, BLOC1S2, BMP6, BRINP1, BRINP3, BTG2, CAMK1D, CCL2, CD38, CDH23, CDHR1, CDK1, CDK5, CHRNB2, CPNE9, CX3CL1, CXCR4, DCLK1, EFNB3, ELAVL4, EMX2, ENC1, EPHA4, ETV5, FEZF2, FGF5, FLRT3, FN1, FRZB, FSHR, FSTL4, GABRA5, GBP3, GFRA2, GJA1, GPR183, GRIN2A, HCN1, HPRT1, IBSP, ID3, IL1RL1, IL33, INHBA, KRT6A, LHX2, LINGO1, LRFN3, MCOLN3, MDG…	[AGT, ANXA1, APCDD1, ASPA, B2M, B3GNT2, BDNF, BHLHE22, BTG4, C21orf91, C3, CCL2, CD38, CDK1, CRABP2, CSF1, CSPG4, CXCR4, DAAM2, DCC, DKK1, EFNB3, EGR2, ENC1, FABP7, FEZF2, FLG, FMN1, FSHR, GABRA5, GBP3, GFAP, GJA1, GPR183, HMGB2, ID3, INHBA, ISLR2, KIRREL3, KLK6, KRT6A, LHX6, LINGO1, LPAR3, LRP2, MAG, MMD, MMD2, NEK3, NEUROD1, NNAT, NOV, NR4A2, NRN1, OGN, OSTN, P2RY12, PAX6, PCDH15, PHGDH, PLA2G1…	34.446	52.7874	42.4983
GO:0048468	cell development	0.000337842	[AGT, ANGPT2, ANOS1, ANXA2, ARC, AREG, ARF4, ASPA, ATRX, B2M, BDNF, BLOC1S2, BMP3, BMP5, BMP6, BRINP3, BRIP1, C3, CD38, CHRNB2, CLEC5A, CX3CR1, DCT, DOK5, EDNRA, EDNRB, EFNA3, EFNB3, EGR2, EVI2B, FAS, FBXO45, FIG4, FSHR, FSTL4, GABRA5, GALNT15, GFAP, GFRA2, GJA1, GPR183, GRHL2, HOMER1, ICAM1, IFT74, INHBA, ISLR2, JUN, KLF4, KLF5, LDLR, LGI1, LGR5, LINGO1, MACF1, MAG, MET, MMD, MT1A, MYORG, NCDN, …	[ADCYAP1, ASPA, BCL6, BDNF, BLOC1S1, BLOC1S2, BMP6, BRINP1, BRINP3, BTG2, CAMK1D, CCL19, CD38, CDH23, CDHR1, CDK1, CDK5, CHRNB2, CLEC5A, CPNE9, CX3CL1, CXCR4, DCLK1, DIAPH2, DND1, EDN1, EFNB3, ELAVL4, ENC1, EPHA4, ETV5, EVI2B, EXPH5, FEZF2, FLRT3, FN1, FRZB, FSHR, FSTL4, GABRA5, GALNT15, GBP3, GFRA2, GJA1, GPR183, HAMP, HCN1, HOMER1, HPRT1, IBSP, IL1A, INHBA, ITGB3, JUND, KRT6A, LHX2, LINGO1, LRF…	[ACTN2, AGT, ANGPT2, ANXA2, ASPA, B2M, B3GNT2, B4GALT1, BDNF, BRIP1, C21orf91, C3, CAMK2D, CCL19, CD36, CD38, CDK1, CITED2, CLEC5A, CRABP2, CSF1, CSPG4, CXCR4, DAAM2, DCC, DEPP1, DIAPH2, DKK1, EFNB3, EGR2, ENC1, EXPH5, FAS, FEZF2, FLG, FMN1, FSHR, GABRA5, GALNT15, GALNT18, GALNTL5, GBP3, GFAP, GJA1, GPR183, HIST1H2BA, HMGB2, HOMER1, HSPA2, ICAM1, INHBA, ISLR2, ITGB3, KIRREL3, KLK6, KRT6A, LHX6, L…	37.7769	48.4685	44.9046
GO:0006796	phosphate-containing compound metabolic process	0.000404995	[ACVR1C, ADRA1B, AGT, ANXA2, APLNR, APOC1, AQP9, AREG, ASPA, BDNF, BGN, BID, BMP3, BMP5, BMP6, C3, CARTPT, CCKBR, CCL2, CCL20, CCL5, CCNA2, CD109, CD38, CD44, CDKL2, CHI3L1, CKS2, CPT1A, CSRNP2, CTGF, CTSH, CUZD1, CX3CR1, CXCL10, CXCL9, CYR61, DOK5, DUSP19, DUSP5, DUSP6, EDNRB, EFEMP1, EFNB3, EGR1, ENSA, EPGN, F3, FABP3, FABP4, FAS, FCGR2A, FIG4, FMO1, FMO2, FSHR, GADD45A, GBA, GFRA2, GH1, GJA1, …	[ADCYAP1, ALDH1A1, ANGPT1, APLNR, ASPA, ASPDH, ATP1A3, ATP2B2, BDNF, BGN, BMP6, CAMK1D, CAMK1G, CCKBR, CCL19, CCL2, CCNC, CD109, CD24, CD38, CD44, CDK1, CDK5, CDKL4, CES1, CIB2, CLK1, COLEC12, CSNK1G2, CX3CL1, CXCL9, CXCR4, DCLK1, DCN, DUSP14, DUSP4, DUSP6, EDN1, EFNB3, ELOVL7, EPHA4, EPHA6, EPHB6, FABP3, FAM126A, FAM20A, FCGR2B, FGF5, FGF9, FLRT3, FMO2, FN1, FSHR, GBA, GFPT2, GFRA2, GHR, GJA1, G…	[ACTN2, AGT, ALDOC, ALPL, ANXA2, APLNR, APOC1, AQP9, ASPA, AVPI1, BDNF, BMP1, C3, CA3, CAMK2D, CAV1, CCL19, CCL2, CCL5, CD109, CD24, CD36, CD38, CD44, CDK1, CEMIP, CHI3L1, COLEC12, CROT, CRYAB, CSF1, CSPG4, CTSH, CXCL10, CXCL9, CXCR4, DAB2, DKK1, DSC1, DSC3, DUSP4, EFEMP1, EFNB3, ELOVL1, ELOVL7, EMP2, ENPP2, ENPP6, ENSA, F2R, FABP3, FAS, FBP2, FCGR2A, FCGR2B, FGF1, FKBP1A, FLG, FMO4, FSHR, GDA, G…	40.3261	44.9981	43.5227
GO:0048699	generation of neurons	0.000405245	[AGT, ANOS1, ARC, AREG, ARF4, ASPA, B2M, BCHE, BDNF, BLOC1S2, BMP5, BMP6, BRINP3, C3, CD38, CHRNB2, CX3CR1, DCT, DOK5, EDNRB, EFNA3, EFNB3, EGR2, FBXO45, FIG4, FSHR, FSTL4, GABRA5, GFAP, GFRA2, GJA1, GPR183, INHBA, ISLR2, JUN, KLF4, LDLR, LGI1, LINGO1, MACF1, MAG, MMD, MT1A, NCDN, NDN, NDNF, NNAT, NOV, NR2E1, NR4A2, NRN1, OSTN, P2RY12, PCSK1, PLXNA4, PROM1, PRTG, RASAL1, RIT2, RNASE1, SDC4, SEMA3…	[ADCYAP1, ASPA, ATP2B2, BCL6, BDNF, BLOC1S1, BLOC1S2, BMP6, BRINP1, BRINP3, BTG2, CAMK1D, CD38, CDH23, CDHR1, CDK1, CDK5, CHRNB2, CPNE9, CX3CL1, CXCR4, DCLK1, EFNB3, ELAVL4, EMX2, ENC1, EPHA4, ETV5, FEZF2, FLRT3, FN1, FRZB, FSHR, FSTL4, GABRA5, GBP3, GFRA2, GJA1, GPR183, HCN1, HPRT1, IBSP, ID3, IL1RL1, INHBA, KRT6A, LHX2, LINGO1, LRFN3, MCOLN3, MDGA1, NAP1L2, NAPA, NCDN, NDNF, NEFH, NELL1, NELL2,…	[AGT, ASPA, B2M, B3GNT2, BDNF, BTG4, C21orf91, C3, CD38, CDK1, CRABP2, CSF1, CXCR4, DAAM2, DCC, DKK1, EFNB3, EGR2, ENC1, FEZF2, FLG, FMN1, FSHR, GABRA5, GBP3, GFAP, GJA1, GPR183, HMGB2, ID3, INHBA, ISLR2, KIRREL3, KLK6, KRT6A, LHX6, LINGO1, LPAR3, LRP2, MAG, MMD, MMD2, NEK3, NEUROD1, NNAT, NOV, NR4A2, NRN1, OGN, OSTN, P2RY12, PAX6, PCDH15, PHGDH, PLA2G10, PLP2, PLPPR4, PLXNB1, PMAIP1, POSTN, PRDM…	35.2337	52.8505	41.8995
GO:0048523	negative regulation of cellular process	0.000677619	[A2ML1, ACADL, ACKR1, ACVR1C, ADH7, AEBP1, AGT, AKR1C1, ANGPT2, ANGPTL4, ANOS1, ANXA2, APLNR, APOC1, AQP1, ARAP3, ARC, AREG, ARF4, ASF1A, ASPA, ATRX, B2M, BAG3, BAMBI, BCHE, BDNF, BGN, BID, BMP5, BMP6, BRCC3, BRINP3, BRIP1, C3, CARD17, CARTPT, CCDC3, CCL2, CCL5, CCNA2, CD109, CD38, CD44, CDR1, CLEC5A, CRHBP, CSRNP2, CTGF, CTSH, CUZD1, CX3CR1, CXCL10, CXCL11, CXCL8, CXCL9, CXXC5, CYP1B1, CYR61, DH…	[A2ML1, ABR, ACKR1, ADAMTS1, ADAMTS9, ADCYAP1, ADORA3, AEBP1, AKR1C1, AKR1C3, ANGPT1, ANGPTL4, ANXA1, APCDD1, APLNR, AQP1, ARHGAP6, ARRDC3, ASPA, ASS1, ATP1A3, ATP2B2, AZGP1, BCL11A, BCL6, BDNF, BGN, BMP6, BRINP1, BRINP3, BTG2, CALB2, CAMK1D, CCDC3, CCL19, CCL2, CD109, CD38, CD44, CDC34, CDK1, CDK5, CFH, CHRDL1, CIB2, CIRBP, CLEC5A, CNIH2, COLEC12, CR1, CRIP2, CRYM, CST4, CX3CL1, CXCL11, CXCL9, C…	[A2M, A2ML1, ACKR1, ACTN2, AEBP1, AGT, AKR1C1, ANGPT2, ANGPTL4, ANXA1, ANXA2, ANXA4, APCDD1, APLNR, APOC1, AQP1, ARAP3, ARHGAP6, ARRDC3, ASPA, AZGP1, B2M, B4GALT1, BDNF, BMP1, BRIP1, BTG4, C3, CAMK2D, CAV1, CCL19, CCL2, CCL5, CD109, CD36, CD38, CD44, CD84, CDH13, CDK1, CDR1, CDX4, CEMIP, CFH, CITED2, CLEC5A, CNIH2, COLEC12, CORO1A, CPAMD8, CR1, CRHBP, CRYAB, CSPG4, CSRP1, CTH, CTSH, CXCL10, CXCL1…	41.4893	45.4406	46.5183
GO:0006468	protein phosphorylation	0.00102729	[ACVR1C, ADRA1B, AGT, ANXA2, APLNR, AREG, ASPA, BDNF, BGN, BMP3, BMP5, BMP6, C3, CARTPT, CCL2, CCL20, CCL5, CCNA2, CD109, CD44, CDKL2, CHI3L1, CKS2, CTGF, CTSH, CUZD1, CX3CR1, CXCL10, CYR61, DOK5, DUSP19, DUSP5, DUSP6, EDNRB, EFEMP1, EFNB3, EGR1, EPGN, F3, FABP4, FAS, FCGR2A, FSHR, GADD45A, GBA, GFRA2, GH1, GJA1, GMFG, GPR183, GRIN2B, GSKIP, ICAM1, IL2RG, IL34, INHBA, ITGA5, ITPKB, JUN, KCNK1, KD…	[ADCYAP1, ANGPT1, APLNR, ASPA, ATP2B2, BDNF, BGN, BMP6, CAMK1D, CAMK1G, CCL19, CCL2, CCNC, CD109, CD24, CD44, CDK1, CDK5, CDKL4, CIB2, CLK1, COLEC12, CSNK1G2, CX3CL1, CXCR4, DCLK1, DCN, DUSP14, DUSP4, DUSP6, EDN1, EFNB3, EPHA4, EPHA6, EPHB6, FAM20A, FCGR2B, FGF5, FGF9, FLRT3, FN1, FSHR, GBA, GFRA2, GHR, GJA1, GPNMB, GPR183, GREM1, GRIN2A, HSPB8, HTR2A, HTR2C, HUNK, IL12RB2, IL18, INHBA, IRAK3, IT…	[ACTN2, AGT, ANXA2, APLNR, ASPA, AVPI1, BDNF, C3, CAMK2D, CAV1, CCL19, CCL2, CCL5, CD109, CD24, CD36, CD44, CDK1, CEMIP, CHI3L1, COLEC12, CROT, CRYAB, CSF1, CSPG4, CTSH, CXCL10, CXCR4, DAB2, DKK1, DUSP4, EFEMP1, EFNB3, EMP2, ENPP2, F2R, FAS, FCGR2A, FCGR2B, FGF1, FKBP1A, FLG, FSHR, GJA1, GPR183, GPR37, GRIN2B, HSPA2, HSPB8, HTR2A, ICAM1, IL12RB2, IL18, IL34, INHBA, ITGB3, ITPKB, KCNK1, LPAR3, MET…	41.8583	45.2831	41.4778
GO:0030030	cell projection organization	0.00111914	[ACKR1, AGT, ANOS1, ARC, AREG, ARF4, ASPA, B2M, BDNF, BLOC1S2, BMP5, C3, CD38, CD44, CHRNB2, CXCL8, DNAH8, DOK5, DYNC2LI1, EFNA3, EFNB3, EGR2, EHD3, EMP1, ERMN, FBXO45, FCGR2A, FIG4, FNBP1L, FSHR, FSTL4, GFAP, GFRA2, GJA1, GRIN2B, HOMER1, ICAM1, IFT74, INHBA, ISLR2, JUN, KLF4, KLF5, LAP3, LGI1, LINGO1, MACF1, MAG, MT1A, NCDN, NDN, NDNF, NOV, NR2E1, NR4A2, NRN1, NXPH1, OSTN, P2RX7, P2RY12, PCSK1, …	[ACKR1, ADCYAP1, ANO6, ASPA, ATP1A3, ATP6V0D1, ATP6V1C1, BDNF, BLOC1S1, BLOC1S2, BTG2, CAMK1D, CCL19, CD38, CD44, CDH23, CDK1, CDK5, CFAP126, CHRNB2, CPNE9, CX3CL1, CXCR4, DCLK1, DYNLT3, EFNB3, EHD3, ELAVL4, EMP1, EMP3, ENC1, EPHA4, FCGR2B, FEZF2, FLRT3, FN1, FRZB, FSCN1, FSHR, FSTL4, GBP3, GFRA2, GJA1, HOMER1, HPRT1, IBSP, INHBA, KRT6A, LHX2, LINGO1, LRFN3, NCDN, NDNF, NEFH, NELL1, NELL2, NEURL1…	[ACKR1, ACTN2, AGT, ANLN, ASPA, B2M, B3GNT2, BDNF, C21orf91, C3, CAV1, CCDC39, CCL19, CD38, CD44, CDH13, CDK1, CORO1A, CRABP2, CXCL8, CXCR4, DCC, DNAH7, EFNB3, EGR2, EMP2, ENC1, ENPP2, ERMN, FCGR2A, FCGR2B, FEZF2, FLG, FMN1, FSHR, GBP3, GFAP, GJA1, GRIN2B, HOMER1, ICAM1, INHBA, ISLR2, ITGA2, KIRREL3, KLK6, KRT6A, LINGO1, LPAR3, LRGUK, LRP2, MAG, NEK3, NOV, NR4A2, NRN1, OGN, OSTN, P2RY12, PAX6, PC…	38.1238	50.0375	44.3189
GO:0120036	plasma membrane bounded cell projection organization	0.00115699	[ACKR1, AGT, ANOS1, ARC, AREG, ARF4, ASPA, B2M, BDNF, BLOC1S2, BMP5, C3, CD38, CD44, CHRNB2, CXCL8, DNAH8, DOK5, DYNC2LI1, EFNA3, EFNB3, EGR2, EHD3, EMP1, FBXO45, FCGR2A, FIG4, FNBP1L, FSHR, FSTL4, GFAP, GFRA2, GJA1, GRIN2B, HOMER1, ICAM1, IFT74, INHBA, ISLR2, JUN, KLF4, KLF5, LAP3, LGI1, LINGO1, MACF1, MAG, MT1A, NCDN, NDN, NDNF, NOV, NR2E1, NR4A2, NRN1, NXPH1, OSTN, P2RX7, P2RY12, PCSK1, PHF11,…	[ACKR1, ADCYAP1, ANO6, ASPA, ATP1A3, ATP6V0D1, ATP6V1C1, BDNF, BLOC1S1, BLOC1S2, BTG2, CAMK1D, CCL19, CD38, CD44, CDH23, CDK1, CDK5, CFAP126, CHRNB2, CPNE9, CX3CL1, CXCR4, DCLK1, DYNLT3, EFNB3, EHD3, ELAVL4, EMP1, EMP3, ENC1, EPHA4, FCGR2B, FEZF2, FLRT3, FN1, FRZB, FSCN1, FSHR, FSTL4, GBP3, GFRA2, GJA1, HOMER1, HPRT1, IBSP, INHBA, KRT6A, LHX2, LINGO1, LRFN3, NCDN, NDNF, NEFH, NELL1, NELL2, NEURL1…	[ACKR1, ACTN2, AGT, ANLN, ASPA, B2M, B3GNT2, BDNF, C21orf91, C3, CAV1, CCDC39, CCL19, CD38, CD44, CDH13, CDK1, CORO1A, CRABP2, CXCL8, CXCR4, DCC, DNAH7, EFNB3, EGR2, EMP2, ENC1, ENPP2, FCGR2A, FCGR2B, FEZF2, FLG, FMN1, FSHR, GBP3, GFAP, GJA1, GRIN2B, HOMER1, ICAM1, INHBA, ISLR2, KIRREL3, KLK6, KRT6A, LINGO1, LPAR3, LRGUK, LRP2, MAG, NEK3, NOV, NR4A2, NRN1, OGN, OSTN, P2RY12, PAX6, PCDH15, PHGDH, …	37.7331	50.7945	44.0219
GO:0048585	negative regulation of response to stimulus	0.00128655	[ACKR1, ADH7, AGT, ANGPT2, ANXA2, AOAH, APLNR, ARAP3, ARC, AREG, BAMBI, BGN, BID, BMP5, CARTPT, CCDC3, CCL2, CCL5, CD109, CD44, CRHBP, CX3CR1, CXCL8, DHX58, DKK2, DUSP19, DUSP5, DUSP6, EGR1, FAS, FCGR2A, FERMT1, FSTL4, GBA, GJA1, GREM2, HLA-A, HLA-G, HMOX1, ICAM1, IFI16, IFI6, IFIT1, IGFBP5, IL13RA2, INHBA, KCNK1, KLF4, LDLR, LRTM2, MET, NDUFA2, NMI, NOV, NR4A2, P2RX7, PARP14, PCSK1, PDE2A, PDGFR…	[ABR, ACKR1, ADCYAP1, ANGPT1, ANXA1, AOAH, APCDD1, APLNR, ARRDC3, ATP2B2, BCL6, BGN, BRINP1, CACNB3, CALB2, CCDC3, CCL2, CD109, CD44, CDC34, CHRDL1, CR1, CX3CL1, DCN, DUSP14, DUSP4, DUSP6, EDN1, EPHA4, FAM89B, FCGR2B, FGF9, FLRT3, FRZB, FSTL4, GBA, GJA1, GRB14, GREM1, GREM2, HSPA1A, IBSP, IFI16, IFI6, IL1A, IL1R1, IL1R2, IL1RL1, IL33, INHBA, IRAK3, KCNK1, LRRC4B, LRRTM1, LY96, MAPK8IP1, MET, MIF,…	[A2M, ACKR1, AGT, ANGPT2, ANXA1, ANXA2, APCDD1, APLNR, ARAP3, ARRDC3, BMP1, CAV1, CCL2, CCL5, CD109, CD44, CD84, CR1, CRHBP, CTH, CXCL8, DAB2, DCC, DKK1, DSC1, DSC3, DUSP4, FABP7, FAS, FCGR2A, FCGR2B, GJA1, GPR17, GPR37, HMGB2, ICAM1, IFI16, IGFBP5, IL13RA2, IL1R1, INHBA, INSL6, KCNK1, LFNG, LILRA2, LRP2, MET, NECAB2, NEUROD1, NHLRC1, NMI, NOV, NPY5R, NR4A2, PADI2, PARP14, PDE2A, PDGFRA, PHLDB2, …	43.801	47.0285	43.801
GO:0031399	regulation of protein modification process	0.0012937	[ADRA1B, AGT, ANXA2, APLNR, AREG, ASPA, ATRX, BDNF, BGN, BMP3, BMP5, BMP6, C3, CARTPT, CCL2, CCL20, CCL5, CCNA2, CD109, CD44, CHI3L1, CKS2, CTGF, CX3CR1, CXCL10, CYR61, DOK5, DUSP19, DUSP5, DUSP6, EDNRB, EGR1, ENSA, EPGN, F3, FABP4, FAS, FCGR2A, FNTA, FSHR, GADD45A, GBA, GFRA2, GH1, GJA1, GMFG, GPR183, GSKIP, HDAC8, ICAM1, IL34, INHBA, ITGA5, ITPKB, JUN, KCNK1, KDR, KLF4, LRTM2, MAS1, MID1, MMD, …	[ADCYAP1, ANGPT1, APLNR, ARRDC3, ARRDC4, ASPA, ATP2B2, BCL6, BDNF, BGN, BMP6, BRINP1, CCL19, CCL2, CCNC, CD109, CD24, CD44, CDK1, CDK5, CIB2, COLEC12, CX3CL1, CXCR4, DCN, DUSP14, DUSP4, DUSP6, EDN1, EPHA4, FAM20A, FCGR2B, FGF9, FLRT3, FN1, FSHR, GBA, GFRA2, GHR, GJA1, GPNMB, GPR183, GREM1, HSPA1A, HTR2A, HTR2C, IL18, INHBA, IRAK3, ITGB3, KCNK1, KDR, KL, LAMTOR3, LRRC4B, LRRTM1, MAPK8IP1, MAS1, MI…	[AGT, ANXA2, APLNR, ARRDC3, ARRDC4, ASPA, AVPI1, BDNF, C3, CAMK2D, CAV1, CCL19, CCL2, CCL5, CD109, CD24, CD36, CD44, CDK1, CEMIP, CHI3L1, COLEC12, CROT, CSF1, CSPG4, CXCL10, CXCR4, DAB2, DKK1, DSC1, DSC3, DUSP4, EMP2, ENPP2, ENSA, F2R, FAS, FCGR2A, FCGR2B, FGF1, FKBP1A, FLG, FSHR, GJA1, GPR183, GPR37, HHATL, HIST1H1B, HSPA2, HTR2A, ICAM1, IL18, IL34, INHBA, INSL6, ITGB3, ITPKB, KCNK1, LPAR3, MMD,…	41.8082	43.7991	42.6046
GO:0030182	neuron differentiation	0.00131129	[AGT, ANOS1, ARC, AREG, ARF4, B2M, BDNF, BLOC1S2, BMP5, BMP6, BRINP3, CD38, CHRNB2, DOK5, EDNRB, EFNA3, EFNB3, EGR2, FBXO45, FIG4, FSHR, FSTL4, GABRA5, GFAP, GFRA2, GJA1, INHBA, ISLR2, JUN, KLF4, LGI1, LINGO1, MACF1, MAG, MMD, MT1A, NCDN, NDN, NDNF, NNAT, NOV, NR2E1, NR4A2, NRN1, OSTN, PCSK1, PLXNA4, PROM1, RASAL1, RIT2, SDC4, SEMA3A, SLC25A4, SLC4A4, TAP2, TIMP1, TNC, TUBB2B, UGT8, VCAM1, VEGFA,…	[ADCYAP1, ATP2B2, BCL6, BDNF, BLOC1S1, BLOC1S2, BMP6, BRINP1, BRINP3, BTG2, CAMK1D, CD38, CDH23, CDHR1, CDK5, CHRNB2, CPNE9, CX3CL1, CXCR4, DCLK1, EFNB3, ELAVL4, EMX2, ENC1, EPHA4, ETV5, FEZF2, FLRT3, FN1, FRZB, FSHR, FSTL4, GABRA5, GBP3, GFRA2, GJA1, HCN1, HPRT1, IBSP, ID3, IL1RL1, INHBA, KRT6A, LHX2, LINGO1, LRFN3, MCOLN3, MDGA1, NAP1L2, NAPA, NCDN, NDNF, NEFH, NELL1, NELL2, NEURL1, NNAT, NOV, …	[AGT, B2M, B3GNT2, BDNF, BTG4, C21orf91, CD38, CRABP2, CXCR4, DCC, DKK1, EFNB3, EGR2, ENC1, FEZF2, FLG, FMN1, FSHR, GABRA5, GBP3, GFAP, GJA1, ID3, INHBA, ISLR2, KIRREL3, KLK6, KRT6A, LHX6, LINGO1, LPAR3, LRP2, MAG, MMD, MMD2, NEK3, NEUROD1, NNAT, NOV, NR4A2, NRN1, OGN, OSTN, PAX6, PCDH15, PHGDH, PLA2G10, PLP2, PLPPR4, PLXNB1, PMAIP1, POSTN, PRDM1, PTN, PTPRO, PTPRR, RASAL1, RND1, S100A8, S100B, S…	33.3379	56.6215	39.6879
GO:0016310	phosphorylation	0.00541577	[ACVR1C, ADRA1B, AGT, ANXA2, APLNR, AREG, ASPA, BDNF, BGN, BID, BMP3, BMP5, BMP6, C3, CARTPT, CCKBR, CCL2, CCL20, CCL5, CCNA2, CD109, CD44, CDKL2, CHI3L1, CKS2, CTGF, CTSH, CUZD1, CX3CR1, CXCL10, CXCL9, CYR61, DOK5, DUSP19, DUSP5, DUSP6, EDNRB, EFEMP1, EFNB3, EGR1, EPGN, F3, FABP4, FAS, FCGR2A, FSHR, GADD45A, GBA, GFRA2, GH1, GJA1, GMFG, GPR183, GRIN2B, GSKIP, ICAM1, IL2RG, IL34, INHBA, ITGA5, IT…	[ADCYAP1, ALDH1A1, ANGPT1, APLNR, ASPA, ATP2B2, BDNF, BGN, BMP6, CAMK1D, CAMK1G, CCKBR, CCL19, CCL2, CCNC, CD109, CD24, CD44, CDK1, CDK5, CDKL4, CIB2, CLK1, COLEC12, CSNK1G2, CX3CL1, CXCL9, CXCR4, DCLK1, DCN, DUSP14, DUSP4, DUSP6, EDN1, EFNB3, EPHA4, EPHA6, EPHB6, FAM126A, FAM20A, FCGR2B, FGF5, FGF9, FLRT3, FN1, FSHR, GBA, GFRA2, GHR, GJA1, GPNMB, GPR183, GREM1, GRIN2A, HSPB8, HTR2A, HTR2C, HUNK,…	[ACTN2, AGT, ALDOC, ANXA2, APLNR, ASPA, AVPI1, BDNF, C3, CAMK2D, CAV1, CCL19, CCL2, CCL5, CD109, CD24, CD36, CD44, CDK1, CEMIP, CHI3L1, COLEC12, CROT, CRYAB, CSF1, CSPG4, CTSH, CXCL10, CXCL9, CXCR4, DAB2, DKK1, DUSP4, EFEMP1, EFNB3, EMP2, ENPP2, F2R, FAS, FCGR2A, FCGR2B, FGF1, FKBP1A, FLG, FSHR, GJA1, GPR183, GPR37, GRIN2B, HSPA2, HSPB8, HTR2A, ICAM1, IL12RB2, IL18, IL34, INHBA, ITGB3, ITPKB, KCN…	41.5482	46.9528	39.8592
GO:0032268	regulation of cellular protein metabolic process	0.00629543	[A2ML1, ACVR1C, ADRA1B, AGT, AIM2, ANOS1, ANXA2, APLNR, AQP1, ARC, AREG, ASPA, ATRX, BDNF, BGN, BID, BMP3, BMP5, BMP6, C3, CARD17, CARTPT, CCL2, CCL20, CCL5, CCNA2, CD109, CD44, CHI3L1, CKS2, CNDP1, CTGF, CTSH, CX3CR1, CXCL10, CYR61, DIO2, DOK5, DUSP19, DUSP5, DUSP6, EDNRB, EFNA3, EGR1, ENSA, EPGN, F3, FABP4, FAS, FCGR2A, FNTA, FSHR, GADD45A, GAS1, GBA, GFRA2, GH1, GJA1, GMFG, GPR183, GRIN2B, GSK…	[A2ML1, ADCYAP1, ANGPT1, APLNR, AQP1, ARRDC3, ARRDC4, ASPA, ATP1A3, ATP2B2, BCL6, BDNF, BGN, BMP6, BRINP1, BTG2, C6, CALB2, CCL19, CCL2, CCNC, CD109, CD24, CD44, CDK1, CDK5, CIB2, CIRBP, CNDP1, COLEC12, CR1, CST4, CX3CL1, CXCR4, DCN, DHCR24, DIO2, DUSP14, DUSP4, DUSP6, EDN1, ENC1, EPHA4, FAM20A, FCGR2B, FGF9, FLRT3, FN1, FSHR, GBA, GFRA2, GHR, GJA1, GPNMB, GPR183, GREM1, GRIN2A, HSPA1A, HTR2A, HT…	[A2M, A2ML1, AGT, ANXA2, APLNR, AQP1, ARRDC3, ARRDC4, ASPA, AVPI1, BDNF, C3, CAMK2D, CAV1, CCL19, CCL2, CCL5, CD109, CD24, CD36, CD44, CDK1, CEMIP, CHI3L1, CNDP1, COLEC12, CPAMD8, CR1, CROT, CRYAB, CSF1, CSPG4, CTSH, CXCL10, CXCR4, DAB2, DIO2, DKK1, DSC1, DSC3, DUSP4, EMP2, ENC1, ENPP2, ENSA, ERC2, F2R, FAS, FCGR2A, FCGR2B, FGF1, FKBP1A, FLG, FSHR, GJA1, GPR183, GPR37, GRIN2B, HHATL, HIST1H1B, HS…	40.2248	44.8307	44.2166
