# Supplementary material
Source: publisher figshare collection journal article supplement (https://tandf.figshare.com/articles/dataset/_/9888425)

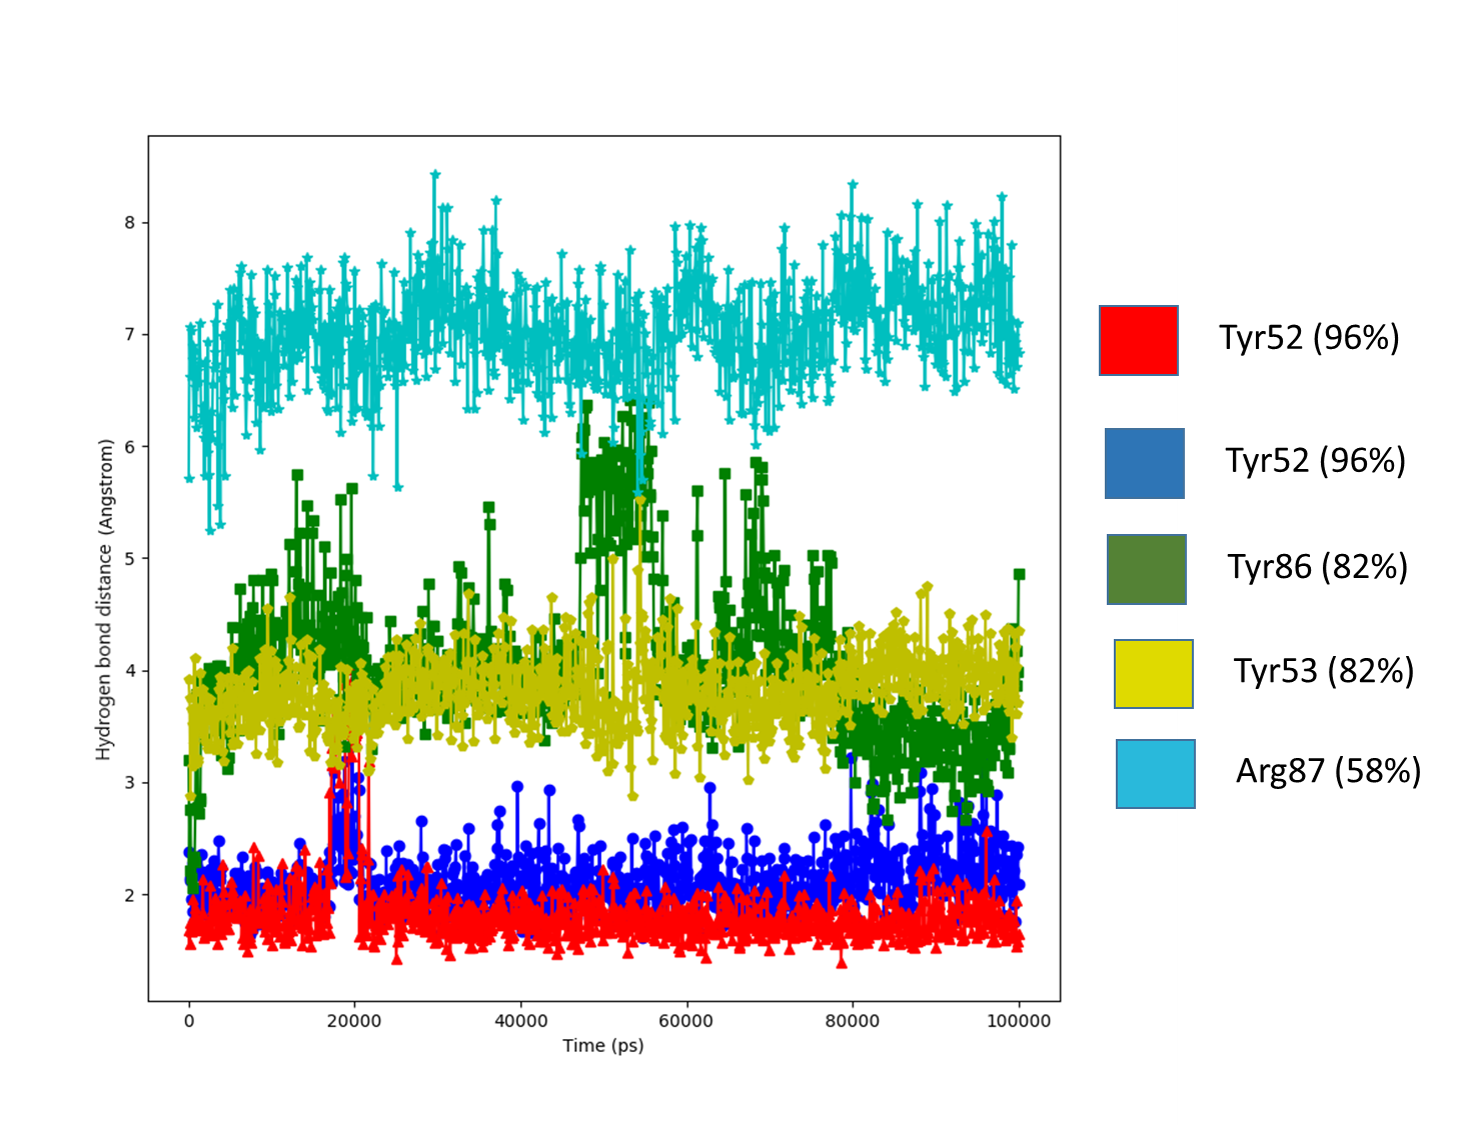

Supplement: Supplementary file 1 [file 2 › tbsd_a_1671231_sm6015.tif]

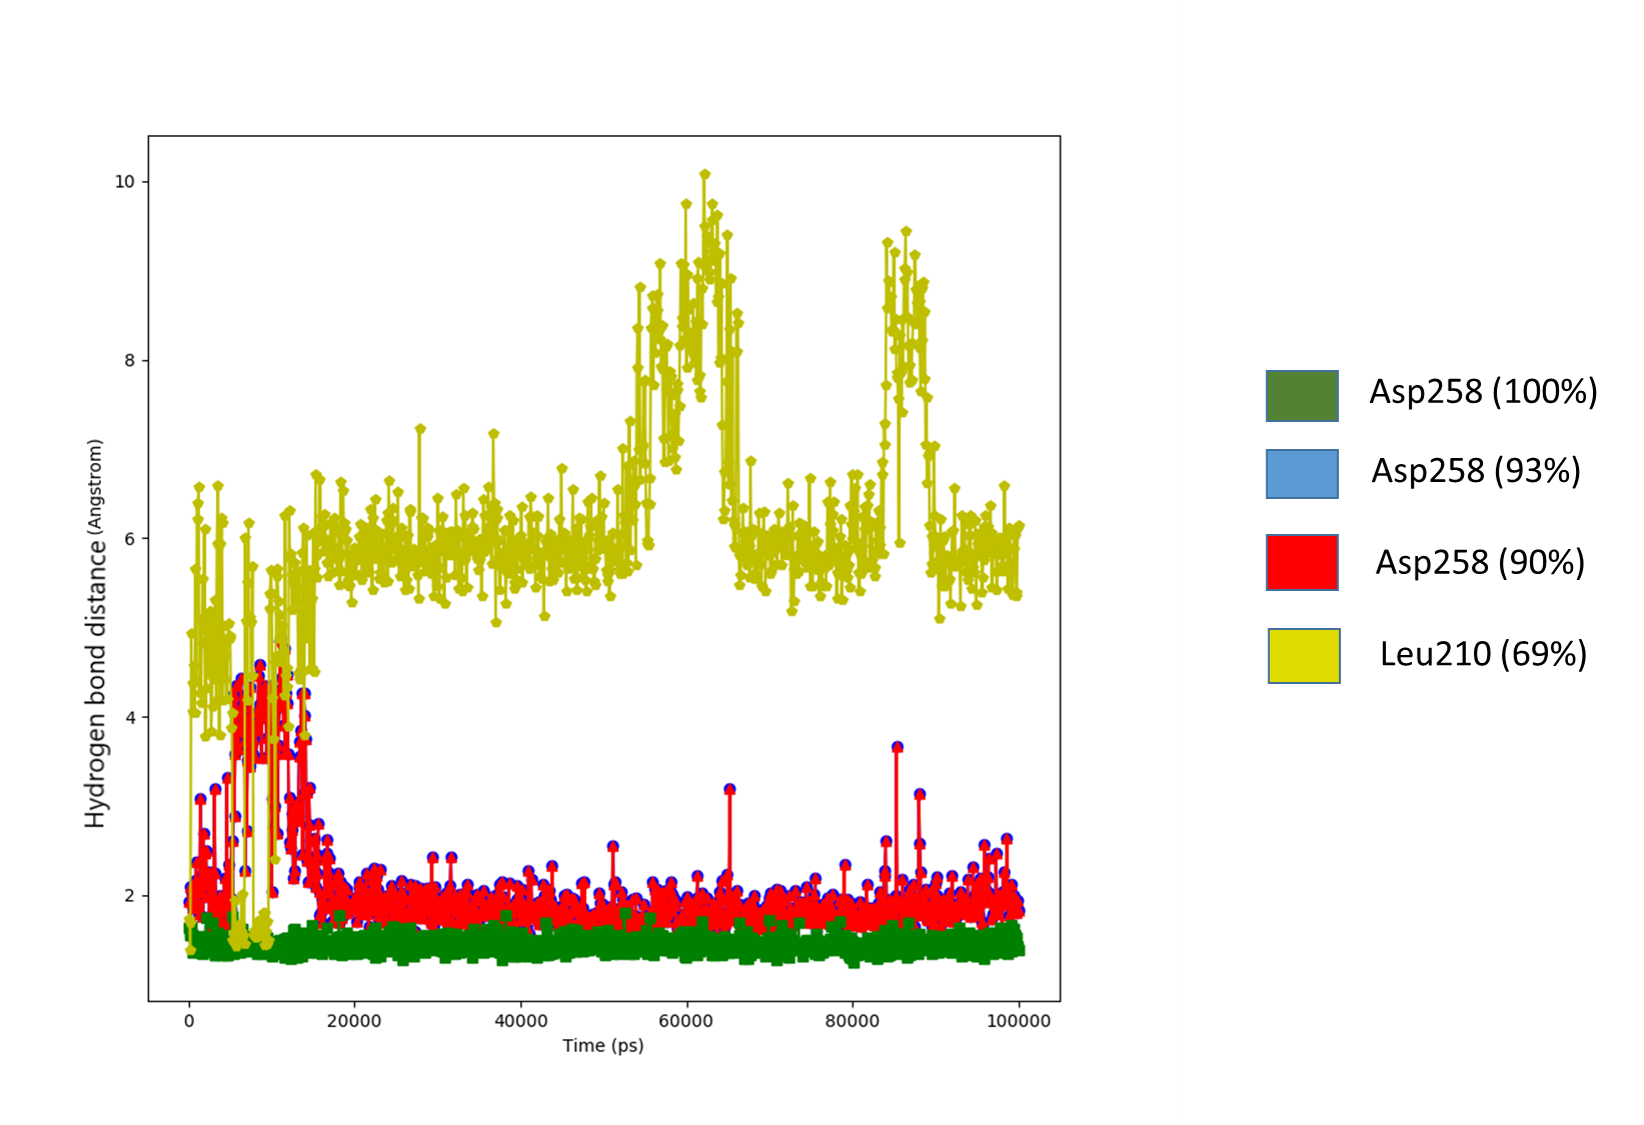

Supplement: Supplementary file 1 [file 2 › tbsd_a_1671231_sm6014.tif]
